# Supplementary material
Source: PubMed Central journal article supplement (PMC3007598)
Supplement: NIHMS245748-supplement-all.pdf [file NIHMS245748-supplement-all.pdf]

### A. IQVVDVR ( $p = 0.084$ )

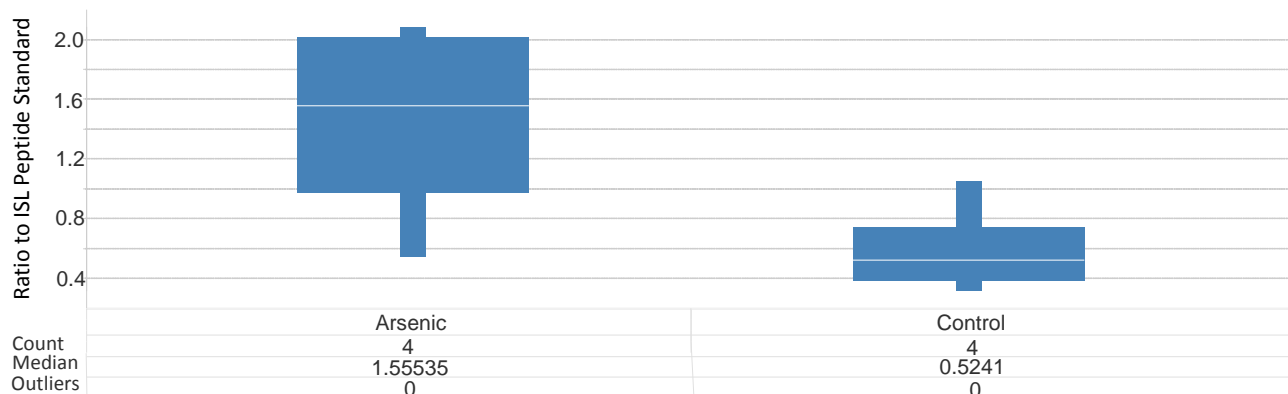

### B. SPNQNVQQAAGALR ( $p = 0.365$ )

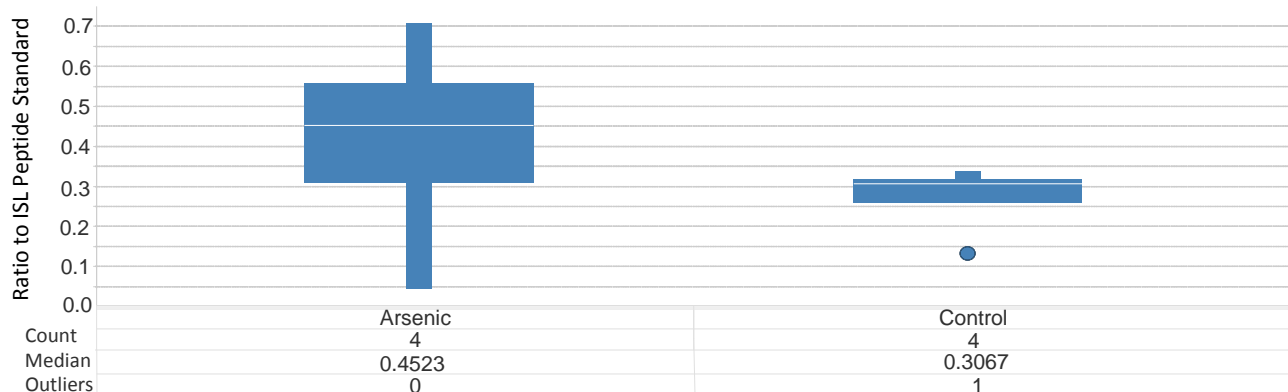

*Supplementary Figure 1.* Relative quantitation of peptides (A) IQVVDVR and (B) SPNQNVQQAAGALR using isotope labeled peptide standards and triple quadrupole (QQQ) mass spectrometry. Each box plot represents the median amount and distribution among the 4 biological replicates tested per condition. In neither case did the p values indicate significant differences between the samples from participants drinking water with high versus low arsenic levels.

**Table S1. Unique Peptides of Nail and Hair Samples from Caucasian and Mongolian Volunteers**

| Identified Proteins                                 | Accession   | MW      | Caucasian Nail ----- |    |     |     |                   |    |    |     |  |
|-----------------------------------------------------|-------------|---------|----------------------|----|-----|-----|-------------------|----|----|-----|--|
|                                                     |             |         | Insoluble -----      |    |     |     | Solubilized ----- |    |    |     |  |
|                                                     |             |         | PMP                  | BP | DP  | RRP | RRS               | BS | DS | PMS |  |
| 1 KRT86 Keratin, type II cuticular Hb6              | IPI00182655 | 53 kDa  | 37                   | 42 | 46  | 47  | 77                | 82 | 82 | 86  |  |
| 2 KRT33B Keratin, type I cuticular Ha3-II           | IPI00031423 | 46 kDa  | 27                   | 31 | 25  | 26  | 59                | 51 | 50 | 64  |  |
| 3 KRT85 Keratin, type II cuticular Hb5              | IPI00032541 | 56 kDa  | 12                   | 13 | 10  | 15  | 38                | 44 | 38 | 45  |  |
| 4 DSP Isoform DPI of Desmoplakin                    | IPI00013933 | 332 kDa | 101                  | 91 | 101 | 55  | 10                | 13 | 15 | 26  |  |
| 5 KRT31 Keratin, type I cuticular Ha1               | IPI00032513 | 47 kDa  | 11                   | 9  | 10  | 12  | 24                | 23 | 22 | 24  |  |
| 6 KRT34 45 kDa protein                              | IPI00917731 | 45 kDa  | 13                   | 14 | 15  | 19  | 21                | 21 | 20 | 16  |  |
| 7 KRT84 Keratin, type II cuticular Hb4              | IPI00300052 | 65 kDa  | 14                   | 25 | 19  | 5   | 20                | 28 | 25 | 28  |  |
| 8 KRT6A Keratin, type II cytoskeletal 6A            | IPI00300725 | 60 kDa  | 8                    | 7  | 17  | 3   | 13                | 32 | 30 | 31  |  |
| 9 LRRC15 Leucine-rich repeat-containing prot        | IPI00152871 | 64 kDa  | 33                   | 41 | 33  | 29  | 11                | 13 | 9  | 7   |  |
| 10 KRT14 Keratin, type I cytoskeletal 14            | IPI00384444 | 52 kDa  | 10                   | 15 | 14  | 7   | 23                | 29 | 23 | 30  |  |
| 11 EPPK1 epiplakin 1                                | IPI00010951 | 556 kDa | 27                   | 20 | 11  | 8   | 0                 | 2  | 0  | 4   |  |
| 12 KRT81 Keratin, type II cuticular Hb1             | IPI00760863 | 55 kDa  | 2                    | 4  | 4   | 4   | 8                 | 5  | 7  | 6   |  |
| 13 JUP Junction plakoglobin                         | IPI00554711 | 82 kDa  | 27                   | 33 | 30  | 22  | 0                 | 0  | 3  | 2   |  |
| 14 KRT17 Keratin, type I cytoskeletal 17            | IPI00450768 | 48 kDa  | 2                    | 0  | 0   | 0   | 6                 | 12 | 13 | 18  |  |
| 15 KRT16 Keratin, type I cytoskeletal 16            | IPI00217963 | 51 kDa  | 6                    | 3  | 4   | 0   | 14                | 21 | 19 | 23  |  |
| 16 KRT5 Keratin, type II cytoskeletal 5             | IPI00009867 | 62 kDa  | 9                    | 4  | 11  | 5   | 9                 | 11 | 11 | 12  |  |
| 17 PKP1 Isoform 1 of Plakophilin-1                  | IPI00218528 | 80 kDa  | 23                   | 26 | 23  | 16  | 0                 | 0  | 0  | 0   |  |
| 18 KRT36 Isoform 1 of Keratin, type I cuticular     | IPI00008692 | 52 kDa  | 6                    | 4  | 5   | 4   | 14                | 17 | 16 | 24  |  |
| 19 KRT82 Keratin, type II cuticular Hb2             | IPI00300053 | 57 kDa  | 0                    | 0  | 0   | 0   | 0                 | 0  | 0  | 0   |  |
| 20 VSIG8 Isoform 1 of V-set and immunoglobulin      | IPI00376274 | 44 kDa  | 19                   | 14 | 16  | 13  | 4                 | 4  | 3  | 0   |  |
| 21 KRT32 Keratin, type I cuticular Ha2              | IPI00291540 | 50 kDa  | 2                    | 0  | 2   | 2   | 4                 | 5  | 5  | 9   |  |
| 22 KRT83 Keratin, type II cuticular Hb3             | IPI00297795 | 54 kDa  | 2                    | 2  | 3   | 3   | 9                 | 9  | 8  | 7   |  |
| 23 KRTAP2-4;LOC728934;KAP2.1B;LOC644350             | IPI00013265 | 13 kDa  | 6                    | 6  | 9   | 8   | 7                 | 4  | 6  | 6   |  |
| 24 FABP4 Fatty acid-binding protein, adipocyte      | IPI00215746 | 15 kDa  | 10                   | 12 | 6   | 6   | 3                 | 0  | 0  | 2   |  |
| 25 KRTAP13-2 Keratin-associated protein 13-2        | IPI00373959 | 19 kDa  | 7                    | 14 | 16  | 9   | 4                 | 5  | 10 | 7   |  |
| 26 HIST1H2BB Histone H2B type 1-B                   | IPI00220403 | 14 kDa  | 4                    | 4  | 3   | 3   | 0                 | 0  | 0  | 0   |  |
| 27 SELENBP1 cDNA FLJ55757, highly similar to        | IPI00012303 | 57 kDa  | 21                   | 27 | 16  | 21  | 0                 | 3  | 0  | 0   |  |
| 28 KRTAP13-4 Keratin-associated protein 13-4        | IPI00373947 | 18 kDa  | 12                   | 16 | 14  | 11  | 5                 | 5  | 4  | 8   |  |
| 29 LGALS7;LGALS7B Galectin-7                        | IPI00219221 | 15 kDa  | 6                    | 5  | 9   | 7   | 4                 | 4  | 0  | 5   |  |
| 30 KRT35 Keratin, type I cuticular Ha5              | IPI00790172 | 50 kDa  | 0                    | 0  | 0   | 0   | 0                 | 0  | 0  | 4   |  |
| 31 SFN Isoform 1 of 14-3-3 protein sigma            | IPI00013890 | 28 kDa  | 10                   | 13 | 11  | 10  | 3                 | 0  | 3  | 5   |  |
| 32 KRTAP11-1 Keratin-associated protein 11-1        | IPI00216711 | 17 kDa  | 0                    | 0  | 15  | 8   | 4                 | 3  | 3  | 3   |  |
| 33 HSPB1 Heat shock protein beta-1                  | IPI00025512 | 23 kDa  | 11                   | 11 | 8   | 10  | 0                 | 0  | 0  | 2   |  |
| 34 GAPDH Glyceraldehyde-3-phosphate dehydrogenase   | IPI00219018 | 36 kDa  | 8                    | 10 | 9   | 7   | 0                 | 0  | 0  | 4   |  |
| 35 ACTB Actin, cytoplasmic 1                        | IPI00021439 | 42 kDa  | 11                   | 10 | 16  | 14  | 0                 | 0  | 0  | 0   |  |
| 36 KRT39 Keratin, type I cytoskeletal 39            | IPI00741855 | 56 kDa  | 9                    | 6  | 12  | 3   | 9                 | 6  | 8  | 7   |  |
| 37 DSG1 Desmoglein-1                                | IPI00025753 | 114 kDa | 18                   | 13 | 20  | 11  | 0                 | 0  | 0  | 0   |  |
| 38 KRTAP13-1 21 kDa protein                         | IPI00328109 | 21 kDa  | 10                   | 11 | 11  | 6   | 5                 | 5  | 6  | 5   |  |
| 39 KRT35 46 kDa protein                             | IPI00798228 | 46 kDa  | 2                    | 3  | 0   | 2   | 0                 | 0  | 0  | 0   |  |
| 40 HIST1H2AH Histone H2A type 1-H                   | IPI00081836 | 14 kDa  | 5                    | 11 | 5   | 11  | 0                 | 0  | 0  | 0   |  |
| 41 DSG4 Isoform 1 of Desmoglein-4                   | IPI00515022 | 114 kDa | 4                    | 7  | 12  | 6   | 0                 | 0  | 0  | 0   |  |
| 42 PRDX6 Peroxiredoxin-6                            | IPI00220301 | 25 kDa  | 11                   | 12 | 11  | 11  | 0                 | 0  | 0  | 0   |  |
| 43 KRTAP3-1;LOC100132802 Keratin-associated protein | IPI00011212 | 11 kDa  | 0                    | 0  | 0   | 2   | 4                 | 0  | 0  | 6   |  |
| 44 KPRP Keratinocyte proline-rich protein           | IPI00514908 | 64 kDa  | 14                   | 10 | 15  | 6   | 0                 | 0  | 0  | 0   |  |
| 45 HIST1H4D;HIST1H4K;HIST1H4B;HIST1H4A;HIST1H4C     | IPI00453473 | 11 kDa  | 8                    | 6  | 6   | 7   | 0                 | 0  | 0  | 2   |  |

|    |                                              |                      |    |    |    |    |   |   |   |    |
|----|----------------------------------------------|----------------------|----|----|----|----|---|---|---|----|
| 46 | EEF1A1 Elongation factor 1-alpha 1           | IPI00396485 ( 50 kDa | 11 | 11 | 7  | 8  | 0 | 0 | 0 | 0  |
| 47 | TAGLN2 Transgelin-2                          | IPI00550363 ( 22 kDa | 6  | 10 | 7  | 6  | 0 | 0 | 0 | 0  |
| 48 | HSPA5 HSPA5 protein                          | IPI00003362 72 kDa   | 6  | 12 | 11 | 2  | 0 | 0 | 0 | 0  |
| 49 | LAP3 Isoform 1 of Cytosol aminopeptidase     | IPI00419237 ( 56 kDa | 9  | 15 | 9  | 13 | 0 | 0 | 0 | 0  |
| 50 | EEF2 Elongation factor 2                     | IPI00186290 95 kDa   | 10 | 13 | 5  | 4  | 0 | 0 | 0 | 0  |
| 51 | AHNAK Neuroblast differentiation-associate   | IPI00021812 629 kDa  | 9  | 2  | 2  | 4  | 0 | 0 | 0 | 0  |
| 52 | ANXA2 annexin A2 isoform 1                   | IPI00418169 ( 40 kDa | 8  | 8  | 8  | 7  | 0 | 0 | 0 | 0  |
| 53 | CALML3 Calmodulin-like protein 3             | IPI00216984 17 kDa   | 6  | 5  | 4  | 5  | 0 | 0 | 0 | 0  |
| 54 | PKP3 Plakophilin-3                           | IPI00026952 87 kDa   | 10 | 6  | 11 | 9  | 0 | 0 | 0 | 0  |
| 55 | KRT1 Keratin, type II cytoskeletal 1         | IPI00220327 66 kDa   | 3  | 3  | 0  | 0  | 3 | 5 | 8 | 10 |
| 56 | FABP5;FABP5L7 Fatty acid-binding protein,    | IPI00007797 15 kDa   | 5  | 4  | 6  | 5  | 0 | 0 | 0 | 3  |
| 57 | PPL Perioplakin                              | IPI00298057 205 kDa  | 17 | 11 | 6  | 2  | 0 | 0 | 0 | 0  |
| 58 | ANXA1 Annexin A1                             | IPI00218918 39 kDa   | 9  | 6  | 8  | 7  | 0 | 0 | 0 | 0  |
| 59 | CRYAB Alpha-crystallin B chain               | IPI00021369 20 kDa   | 4  | 6  | 6  | 3  | 0 | 0 | 0 | 0  |
| 60 | ENO1 Isoform alpha-enolase of Alpha-enolase  | IPI00465248 47 kDa   | 7  | 9  | 6  | 6  | 0 | 0 | 0 | 0  |
| 61 | cDNA FLJ54554, highly similar to Pyruvate k  | IPI00910979 56 kDa   | 7  | 6  | 8  | 6  | 0 | 0 | 0 | 0  |
| 62 | S100A3 Protein S100-A3                       | IPI00016752 12 kDa   | 0  | 6  | 0  | 4  | 0 | 0 | 0 | 0  |
| 63 | TUBA1A Tubulin alpha-1A chain                | IPI00180675 50 kDa   | 8  | 5  | 4  | 4  | 0 | 0 | 0 | 0  |
| 64 | KRT33A Keratin, type I cuticular Ha3-I       | IPI00297632 46 kDa   | 0  | 0  | 0  | 0  | 0 | 0 | 0 | 0  |
| 65 | LGALS3 Galectin-3                            | IPI00465431 26 kDa   | 2  | 6  | 4  | 4  | 0 | 0 | 0 | 0  |
| 66 | HSPA2 Heat shock-related 70 kDa protein 2    | IPI00007702 70 kDa   | 2  | 5  | 3  | 3  | 0 | 0 | 0 | 0  |
| 67 | TUBB2A Tubulin beta-2A chain                 | IPI00013475 50 kDa   | 7  | 5  | 2  | 5  | 0 | 0 | 0 | 0  |
| 68 | TGM3 Protein-glutamine gamma-glutamylt       | IPI00300376 77 kDa   | 6  | 10 | 4  | 3  | 0 | 0 | 0 | 0  |
| 69 | PGK1 Phosphoglycerate kinase 1               | IPI00169383 45 kDa   | 9  | 5  | 7  | 6  | 0 | 0 | 0 | 0  |
| 71 | SERPINB2 Plasminogen activator inhibitor 2   | IPI00007117 47 kDa   | 4  | 4  | 2  | 3  | 0 | 0 | 0 | 0  |
| 72 | YWHAZ 14-3-3 protein zeta/delta              | IPI00021263 28 kDa   | 6  | 3  | 5  | 5  | 0 | 0 | 0 | 2  |
| 73 | CKB Creatine kinase B-type                   | IPI00022977 43 kDa   | 5  | 9  | 0  | 5  | 0 | 0 | 0 | 0  |
| 74 | TPI1 Isoform 1 of Triosephosphate isomera    | IPI00465028 31 kDa   | 5  | 5  | 5  | 4  | 0 | 0 | 0 | 0  |
| 75 | LDHA cDNA FLJ55792, highly similar to L-lac  | IPI00217966 40 kDa   | 5  | 7  | 4  | 4  | 0 | 0 | 0 | 0  |
| 76 | KRTAP3-3;LOC100132276 Keratin-associate      | IPI00013267 10 kDa   | 0  | 0  | 0  | 0  | 0 | 0 | 0 | 0  |
| 77 | KRT80 Isoform 2 of Keratin, type II cytoskel | IPI00431749 ( 47 kDa | 7  | 2  | 5  | 0  | 0 | 0 | 0 | 0  |
| 78 | LOC440926;H3F3B;H3F3A Histone H3.3           | IPI00219038 15 kDa   | 3  | 5  | 3  | 3  | 0 | 0 | 0 | 0  |
| 79 | LMNA Isoform A of Lamin-A/C                  | IPI00021405 74 kDa   | 6  | 0  | 3  | 2  | 0 | 0 | 0 | 0  |
| 80 | ALDOC cDNA FLJ56450, highly similar to Fru   | IPI00418262 48 kDa   | 4  | 2  | 6  | 5  | 0 | 0 | 0 | 0  |
| 81 | 29 kDa protein                               | IPI00453476 ( 29 kDa | 5  | 5  | 3  | 5  | 0 | 0 | 0 | 0  |
| 82 | PLCD1 phospholipase C, delta 1 isoform 1     | IPI00016461 ( 88 kDa | 2  | 3  | 3  | 2  | 0 | 0 | 0 | 0  |
| 83 | LOC654188 similar to peptidylprolyl isomer   | IPI00887678 24 kDa   | 5  | 7  | 5  | 3  | 0 | 0 | 0 | 0  |
| 84 | FLG Filaggrin                                | IPI00026256 435 kDa  | 0  | 0  | 0  | 0  | 0 | 0 | 0 | 0  |
| 86 | SERPINB5 Serpin B5                           | IPI00783625 42 kDa   | 6  | 7  | 6  | 4  | 0 | 0 | 0 | 0  |
| 87 | KRTAP3-2;LOC100128819 Keratin-associate      | IPI00011214 10 kDa   | 0  | 0  | 0  | 0  | 3 | 0 | 0 | 0  |
| 88 | DSC3 Isoform 3A of Desmocollin-3             | IPI00031549 100 kDa  | 4  | 5  | 12 | 2  | 0 | 0 | 0 | 0  |
| 89 | LOC100131696 Putative keratin-associated     | IPI00791014 54 kDa   | 0  | 0  | 0  | 0  | 0 | 0 | 0 | 0  |
| 90 | PLEC1 Isoform 3 of Plectin-1                 | IPI00398002 518 kDa  | 0  | 3  | 0  | 3  | 0 | 0 | 0 | 0  |
| 91 | EZR Ezrin                                    | IPI00843975 ( 69 kDa | 4  | 4  | 3  | 4  | 0 | 0 | 0 | 0  |
| 92 | CTNNB1 Isoform 1 of Catenin beta-1           | IPI00017292 ( 85 kDa | 3  | 3  | 0  | 0  | 0 | 0 | 0 | 0  |
| 93 | KRT6C Keratin, type II cytoskeletal 6C       | IPI00299145 60 kDa   | 0  | 0  | 0  | 0  | 0 | 0 | 0 | 0  |
| 94 | KRT40 Keratin, type I cytoskeletal 40        | IPI00552959 48 kDa   | 0  | 0  | 0  | 0  | 0 | 0 | 0 | 0  |
| 95 | HIST2H2AA3;HIST2H2AA4 Histone H2A type       | IPI00216457 ( 14 kDa | 2  | 3  | 2  | 0  | 0 | 0 | 0 | 0  |
| 96 | PABPC1 Isoform 1 of Polyadenylate-binding    | IPI00008524 ( 71 kDa | 3  | 6  | 2  | 0  | 0 | 0 | 0 | 0  |

|     |                                              |             |          |   |   |   |   |   |   |   |   |
|-----|----------------------------------------------|-------------|----------|---|---|---|---|---|---|---|---|
| 97  | HIST1H1E Histone H1.4                        | IPI00217467 | 22 kDa   | 0 | 0 | 0 | 0 | 0 | 0 | 0 | 0 |
| 98  | KRT10 Keratin, type I cytoskeletal 10        | IPI00009865 | 60 kDa   | 0 | 0 | 0 | 0 | 0 | 5 | 3 | 5 |
| 99  | CALML5 Calmodulin-like protein 5             | IPI00021536 | 16 kDa   | 6 | 3 | 5 | 6 | 0 | 0 | 0 | 0 |
| 101 | HIST1H1B Histone H1.5                        | IPI00217468 | 23 kDa   | 3 | 0 | 0 | 0 | 0 | 0 | 0 | 0 |
| 102 | S100A11 Protein S100-A11                     | IPI00013895 | 12 kDa   | 5 | 4 | 2 | 4 | 0 | 0 | 0 | 0 |
| 103 | RPSA 33 kDa protein                          | IPI00413108 | (33 kDa  | 0 | 3 | 2 | 2 | 0 | 0 | 0 | 0 |
| 104 | Keratin-81-like protein                      | IPI00008669 | 53 kDa   | 0 | 0 | 2 | 0 | 2 | 0 | 4 | 0 |
| 105 | RNH1 Ribonuclease inhibitor                  | IPI00550069 | 50 kDa   | 2 | 3 | 2 | 2 | 0 | 0 | 0 | 0 |
| 106 | ALB Isoform 1 of Serum albumin               | IPI00745872 | 69 kDa   | 0 | 0 | 0 | 0 | 0 | 3 | 0 | 0 |
| 107 | KRT9 Keratin, type I cytoskeletal 9          | IPI00019359 | 62 kDa   | 0 | 0 | 0 | 0 | 0 | 3 | 0 | 6 |
| 108 | DUSP14 Dual specificity protein phosphatase  | IPI00013031 | 22 kDa   | 2 | 2 | 2 | 2 | 0 | 0 | 0 | 0 |
| 109 | UBA52 ubiquitin and ribosomal protein L40    | IPI00456429 | 15 kDa   | 2 | 0 | 2 | 0 | 0 | 0 | 0 | 0 |
| 110 | POF1B Isoform 1 of Protein POF1B             | IPI00103242 | (69 kDa  | 6 | 5 | 3 | 3 | 0 | 0 | 0 | 0 |
| 111 | EEF1G cDNA FLJ56389, highly similar to Elo   | IPI00000875 | (56 kDa  | 3 | 5 | 2 | 3 | 0 | 0 | 0 | 0 |
| 112 | RPS3 40S ribosomal protein S3                | IPI00011253 | 27 kDa   | 3 | 3 | 4 | 0 | 0 | 0 | 0 | 0 |
| 113 | EIF4A1 Eukaryotic initiation factor 4A-I     | IPI00025491 | (46 kDa  | 4 | 2 | 3 | 2 | 0 | 0 | 0 | 0 |
| 114 | IVL cDNA FLJ61407, highly similar to Involuc | IPI00011692 | 70 kDa   | 3 | 0 | 4 | 0 | 0 | 0 | 0 | 0 |
| 115 | TXNRD1 Isoform 5 of Thioredoxin reductase    | IPI00554786 | 55 kDa   | 5 | 3 | 3 | 0 | 0 | 0 | 2 | 0 |
| 116 | KRTAP24-1 Keratin-associated protein 24-1    | IPI00414750 | 28 kDa   | 0 | 0 | 0 | 0 | 0 | 0 | 0 | 0 |
| 117 | SERPINB13 Isoform 2 of Serpin B13            | IPI00220494 | 38 kDa   | 4 | 0 | 0 | 2 | 0 | 0 | 0 | 0 |
| 118 | HSP90AB1 Heat shock protein HSP 90-beta      | IPI00414676 | 83 kDa   | 0 | 3 | 2 | 2 | 0 | 0 | 0 | 0 |
| 119 | ATP5B ATP synthase subunit beta, mitochon    | IPI00303476 | 57 kDa   | 0 | 2 | 0 | 0 | 0 | 0 | 0 | 0 |
| 122 | YWHAE 14-3-3 protein epsilon                 | IPI00000816 | 29 kDa   | 2 | 0 | 2 | 0 | 0 | 0 | 0 | 0 |
| 123 | RPLP2 60S acidic ribosomal protein P2        | IPI00008529 | 12 kDa   | 4 | 3 | 0 | 2 | 0 | 0 | 0 | 0 |
| 124 | CFL1 Cofilin-1                               | IPI00012011 | 19 kDa   | 2 | 5 | 0 | 0 | 0 | 0 | 0 | 0 |
| 125 | RPL4 60S ribosomal protein L4                | IPI00003918 | 48 kDa   | 4 | 0 | 2 | 2 | 0 | 0 | 0 | 0 |
| 126 | RPLP0 60S acidic ribosomal protein P0        | IPI00008530 | 34 kDa   | 0 | 7 | 0 | 2 | 0 | 0 | 0 | 0 |
| 127 | DSC1 Isoform 1A of Desmocollin-1             | IPI00216099 | (100 kDa | 5 | 2 | 4 | 0 | 0 | 0 | 0 | 0 |
| 128 | KRT38 Keratin, type I cuticular Ha8          | IPI00297641 | 50 kDa   | 0 | 0 | 0 | 0 | 0 | 0 | 0 | 0 |
| 129 | HSD17B4 Peroxisomal multifunctional enzy     | IPI00019912 | 80 kDa   | 0 | 4 | 0 | 0 | 0 | 0 | 0 | 0 |
| 130 | 48 kDa protein                               | IPI00798387 | 48 kDa   | 0 | 0 | 0 | 0 | 0 | 0 | 0 | 0 |
| 131 | AIM1 Absent in melanoma 1 protein            | IPI00294840 | 189 kDa  | 0 | 0 | 0 | 0 | 0 | 0 | 0 | 0 |
| 132 | HSPA1B;HSPA1A Heat shock 70 kDa protein      | IPI00304925 | (70 kDa  | 2 | 0 | 0 | 2 | 0 | 0 | 0 | 0 |
| 133 | HEPHL1 Hephaestin-like protein 1             | IPI00848044 | 132 kDa  | 0 | 0 | 0 | 0 | 0 | 0 | 0 | 0 |
| 134 | MDH2 Malate dehydrogenase, mitochondri       | IPI00291006 | 36 kDa   | 0 | 3 | 0 | 0 | 0 | 0 | 0 | 0 |
| 135 | H2AFY H2A histone family, member Y isofo     | IPI00059366 | (39 kDa  | 3 | 3 | 2 | 2 | 0 | 0 | 0 | 0 |
| 136 | KRT4 cDNA FLJ55805, highly similar to Kera   | IPI00797452 | 52 kDa   | 0 | 0 | 0 | 0 | 0 | 0 | 0 | 0 |
| 137 | DSC2 cDNA FLJ55716, highly similar to Desr   | IPI00025846 | 101 kDa  | 0 | 2 | 6 | 0 | 0 | 0 | 0 | 0 |
| 138 | GDI2 cDNA FLJ60299, highly similar to Rab (  | IPI00031461 | 51 kDa   | 3 | 4 | 0 | 0 | 0 | 0 | 0 | 0 |
| 139 | RPS8 40S ribosomal protein S8                | IPI00216587 | (24 kDa  | 2 | 2 | 2 | 0 | 0 | 0 | 0 | 0 |
| 143 | PRDX2 Peroxiredoxin-2                        | IPI00027350 | (22 kDa  | 0 | 2 | 0 | 0 | 0 | 0 | 0 | 0 |
| 144 | EFHD1 EF-hand domain-containing protein      | IPI00031091 | 27 kDa   | 2 | 0 | 0 | 0 | 0 | 0 | 0 | 0 |
| 145 | RPL3 60S ribosomal protein L3                | IPI00550021 | 46 kDa   | 2 | 2 | 3 | 0 | 0 | 0 | 0 | 0 |
| 146 | Putative uncharacterized protein ENSP000C    | IPI00871908 | 32 kDa   | 0 | 2 | 3 | 2 | 0 | 0 | 0 | 0 |
| 147 | HSPA8 Isoform 1 of Heat shock cognate 71     | IPI00003865 | 71 kDa   | 2 | 0 | 0 | 0 | 0 | 0 | 0 | 0 |
| 148 | EVPL Envoplakin                              | IPI00023711 | 232 kDa  | 2 | 0 | 0 | 0 | 0 | 0 | 0 | 0 |
| 149 | FASN Fatty acid synthase                     | IPI00026781 | 273 kDa  | 2 | 3 | 0 | 0 | 0 | 0 | 0 | 0 |
| 150 | ALDOA Fructose-bisphosphate aldolase A       | IPI00465439 | 39 kDa   | 0 | 0 | 2 | 0 | 0 | 0 | 0 | 0 |
| 151 | TUBA1B cDNA FLJ60097, highly similar to Tu   | IPI00792677 | 46 kDa   | 0 | 2 | 0 | 0 | 0 | 0 | 0 | 0 |





Mongolian Nail -----

Low Arsenic ----- High Arsenic -----

Insoluble ----- Solubilized ----- Insoluble ----- Solubilized -----

|     | c127 | c129 | c130 | c134 | c127s | c129s | c130s | c134s | a24 | a28 | a29 | a30 | a24s | a30s | a29s | a28s |
|-----|------|------|------|------|-------|-------|-------|-------|-----|-----|-----|-----|------|------|------|------|
|     | 49   | 62   | 56   | 51   | 84    | 87    | 73    | 72    | 47  | 50  | 50  | 53  | 83   | 76   | 90   | 83   |
|     | 31   | 44   | 35   | 34   | 59    | 58    | 53    | 55    | 39  | 29  | 31  | 31  | 63   | 46   | 58   | 59   |
|     | 16   | 25   | 20   | 18   | 30    | 35    | 34    | 29    | 21  | 17  | 21  | 17  | 41   | 34   | 40   | 36   |
| 126 | 121  | 124  | 137  | 16   | 41    | 35    | 22    | 41    | 78  | 143 | 129 | 25  | 25   | 28   | 40   |      |
|     | 13   | 13   | 13   | 13   | 22    | 25    | 19    | 22    | 16  | 16  | 13  | 13  | 21   | 19   | 21   | 20   |
|     | 13   | 17   | 18   | 15   | 19    | 26    | 19    | 25    | 14  | 13  | 16  | 18  | 28   | 27   | 22   | 21   |
|     | 10   | 18   | 28   | 27   | 24    | 38    | 41    | 44    | 11  | 19  | 34  | 25  | 55   | 51   | 54   | 44   |
|     | 10   | 12   | 29   | 18   | 30    | 50    | 57    | 45    | 5   | 10  | 19  | 24  | 35   | 45   | 35   | 50   |
|     | 30   | 30   | 27   | 28   | 9     | 9     | 10    | 7     | 8   | 21  | 26  | 28  | 14   | 9    | 10   | 9    |
|     | 18   | 18   | 24   | 19   | 26    | 42    | 36    | 35    | 10  | 15  | 24  | 19  | 33   | 30   | 33   | 35   |
|     | 32   | 29   | 36   | 34   | 0     | 7     | 10    | 7     | 6   | 9   | 44  | 32  | 6    | 5    | 8    | 4    |
|     | 3    | 4    | 3    | 3    | 6     | 6     | 5     | 6     | 6   | 4   | 3   | 3   | 6    | 6    | 6    | 6    |
|     | 34   | 32   | 32   | 30   | 3     | 8     | 5     | 6     | 9   | 24  | 39  | 28  | 3    | 3    | 3    | 6    |
|     | 0    | 9    | 17   | 12   | 9     | 26    | 29    | 22    | 2   | 7   | 11  | 11  | 18   | 26   | 19   | 29   |
|     | 4    | 4    | 12   | 10   | 6     | 28    | 23    | 24    | 4   | 2   | 6   | 11  | 15   | 22   | 18   | 23   |
|     | 9    | 14   | 17   | 15   | 22    | 30    | 26    | 29    | 8   | 12  | 18  | 14  | 21   | 21   | 20   | 23   |
|     | 31   | 27   | 25   | 28   | 0     | 0     | 0     | 0     | 8   | 18  | 23  | 24  | 0    | 0    | 0    | 0    |
|     | 3    | 9    | 8    | 12   | 19    | 21    | 21    | 21    | 6   | 8   | 14  | 9   | 25   | 23   | 24   | 21   |
|     | 0    | 0    | 0    | 0    | 0     | 0     | 0     | 0     | 0   | 0   | 0   | 0   | 0    | 0    | 0    | 0    |
|     | 13   | 14   | 11   | 10   | 7     | 5     | 4     | 5     | 2   | 10  | 10  | 11  | 3    | 5    | 0    | 0    |
|     | 0    | 3    | 3    | 3    | 6     | 7     | 4     | 5     | 0   | 2   | 0   | 2   | 3    | 4    | 4    | 5    |
|     | 0    | 3    | 3    | 0    | 7     | 7     | 7     | 6     | 4   | 4   | 0   | 0   | 9    | 8    | 8    | 7    |
|     | 9    | 12   | 5    | 11   | 15    | 9     | 12    | 12    | 8   | 11  | 7   | 7   | 8    | 11   | 10   | 8    |
|     | 12   | 9    | 9    | 11   | 4     | 6     | 5     | 4     | 3   | 10  | 10  | 10  | 6    | 3    | 6    | 5    |
|     | 16   | 15   | 12   | 14   | 15    | 17    | 14    | 15    | 7   | 11  | 15  | 12  | 16   | 17   | 16   | 10   |
|     | 5    | 5    | 3    | 5    | 0     | 0     | 2     | 0     | 3   | 4   | 5   | 4   | 0    | 0    | 0    | 0    |
|     | 27   | 24   | 20   | 20   | 5     | 2     | 2     | 3     | 0   | 7   | 22  | 14  | 0    | 0    | 2    | 0    |
|     | 13   | 11   | 14   | 15   | 8     | 15    | 12    | 13    | 7   | 10  | 14  | 10  | 10   | 12   | 12   | 5    |
|     | 10   | 8    | 7    | 10   | 4     | 4     | 2     | 3     | 5   | 6   | 9   | 10  | 3    | 0    | 4    | 3    |
|     | 0    | 4    | 2    | 0    | 3     | 4     | 4     | 3     | 0   | 2   | 0   | 0   | 5    | 4    | 5    | 4    |
|     | 18   | 14   | 19   | 17   | 0     | 3     | 0     | 0     | 3   | 9   | 18  | 12  | 4    | 3    | 2    | 0    |
|     | 13   | 10   | 5    | 10   | 7     | 5     | 5     | 4     | 14  | 11  | 5   | 7   | 5    | 5    | 5    | 5    |
|     | 11   | 13   | 17   | 13   | 0     | 9     | 9     | 5     | 4   | 10  | 12  | 13  | 3    | 6    | 5    | 11   |
|     | 11   | 11   | 13   | 12   | 6     | 6     | 8     | 5     | 0   | 7   | 14  | 13  | 4    | 8    | 6    | 5    |
|     | 14   | 16   | 16   | 12   | 0     | 7     | 5     | 0     | 2   | 9   | 15  | 14  | 0    | 5    | 3    | 6    |
|     | 11   | 11   | 9    | 12   | 4     | 6     | 4     | 4     | 2   | 5   | 10  | 9   | 4    | 6    | 4    | 4    |
|     | 17   | 20   | 18   | 16   | 0     | 7     | 5     | 3     | 3   | 5   | 19  | 16  | 5    | 4    | 4    | 6    |
|     | 8    | 6    | 8    | 9    | 7     | 10    | 7     | 9     | 3   | 6   | 9   | 6   | 8    | 8    | 9    | 7    |
|     | 0    | 0    | 0    | 0    | 3     | 0     | 0     | 0     | 0   | 0   | 0   | 0   | 0    | 0    | 2    | 0    |
|     | 8    | 5    | 4    | 5    | 0     | 0     | 0     | 0     | 0   | 3   | 6   | 6   | 0    | 0    | 0    | 0    |
|     | 13   | 11   | 14   | 9    | 0     | 0     | 0     | 0     | 0   | 8   | 6   | 8   | 0    | 0    | 0    | 0    |
|     | 12   | 11   | 13   | 10   | 0     | 0     | 0     | 0     | 0   | 5   | 12  | 11  | 0    | 0    | 0    | 0    |
|     | 4    | 2    | 3    | 3    | 4     | 3     | 3     | 2     | 4   | 2   | 0   | 2   | 5    | 3    | 3    | 2    |
|     | 6    | 17   | 16   | 19   | 0     | 0     | 4     | 4     | 5   | 7   | 19  | 22  | 3    | 9    | 4    | 3    |
|     | 6    | 5    | 7    | 7    | 0     | 0     | 0     | 0     | 0   | 6   | 9   | 6   | 0    | 0    | 0    | 2    |

|    |    |    |    |   |    |   |    |   |   |    |    |   |   |   |    |
|----|----|----|----|---|----|---|----|---|---|----|----|---|---|---|----|
| 10 | 11 | 11 | 12 | 0 | 0  | 0 | 0  | 3 | 5 | 12 | 12 | 0 | 0 | 0 | 0  |
| 9  | 10 | 10 | 9  | 0 | 0  | 0 | 0  | 2 | 5 | 10 | 11 | 0 | 0 | 0 | 0  |
| 10 | 12 | 12 | 12 | 0 | 0  | 0 | 0  | 0 | 4 | 21 | 15 | 0 | 0 | 0 | 0  |
| 13 | 12 | 9  | 12 | 0 | 0  | 0 | 0  | 0 | 0 | 11 | 17 | 0 | 0 | 0 | 0  |
| 13 | 14 | 11 | 14 | 0 | 0  | 0 | 0  | 0 | 3 | 14 | 10 | 0 | 0 | 0 | 0  |
| 8  | 8  | 6  | 6  | 0 | 0  | 0 | 0  | 0 | 6 | 12 | 4  | 0 | 0 | 0 | 0  |
| 10 | 12 | 9  | 7  | 0 | 3  | 3 | 2  | 3 | 7 | 8  | 13 | 0 | 0 | 0 | 0  |
| 5  | 4  | 5  | 3  | 0 | 0  | 3 | 0  | 3 | 4 | 4  | 6  | 3 | 0 | 0 | 2  |
| 10 | 11 | 13 | 13 | 0 | 0  | 0 | 0  | 3 | 4 | 12 | 9  | 0 | 0 | 0 | 0  |
| 0  | 0  | 0  | 4  | 0 | 18 | 8 | 23 | 0 | 0 | 0  | 0  | 7 | 7 | 6 | 10 |
| 4  | 3  | 6  | 4  | 3 | 5  | 4 | 5  | 0 | 3 | 7  | 6  | 6 | 5 | 4 | 6  |
| 20 | 9  | 10 | 11 | 0 | 0  | 0 | 0  | 0 | 8 | 22 | 12 | 0 | 0 | 0 | 0  |
| 6  | 11 | 9  | 9  | 0 | 0  | 0 | 0  | 2 | 5 | 13 | 8  | 0 | 0 | 0 | 0  |
| 7  | 6  | 8  | 10 | 0 | 0  | 0 | 0  | 0 | 4 | 7  | 7  | 0 | 0 | 0 | 0  |
| 9  | 10 | 11 | 9  | 0 | 3  | 3 | 0  | 0 | 5 | 9  | 10 | 0 | 0 | 0 | 0  |
| 13 | 13 | 13 | 14 | 0 | 0  | 3 | 0  | 0 | 6 | 9  | 14 | 0 | 0 | 0 | 0  |
| 5  | 4  | 5  | 0  | 0 | 0  | 0 | 0  | 0 | 4 | 0  | 4  | 0 | 0 | 0 | 0  |
| 3  | 7  | 7  | 5  | 0 | 3  | 0 | 0  | 0 | 0 | 8  | 8  | 0 | 0 | 0 | 2  |
| 0  | 0  | 0  | 0  | 0 | 0  | 0 | 0  | 0 | 0 | 2  | 0  | 0 | 0 | 0 | 0  |
| 5  | 4  | 4  | 4  | 0 | 0  | 0 | 0  | 0 | 3 | 4  | 4  | 0 | 0 | 0 | 0  |
| 5  | 6  | 9  | 8  | 0 | 0  | 0 | 0  | 0 | 5 | 10 | 10 | 0 | 0 | 0 | 0  |
| 4  | 4  | 5  | 5  | 0 | 0  | 0 | 0  | 0 | 0 | 6  | 3  | 0 | 0 | 0 | 0  |
| 5  | 9  | 4  | 5  | 0 | 0  | 3 | 0  | 2 | 3 | 8  | 5  | 3 | 4 | 0 | 0  |
| 10 | 6  | 8  | 7  | 0 | 0  | 0 | 0  | 0 | 2 | 8  | 9  | 0 | 0 | 0 | 0  |
| 4  | 14 | 9  | 12 | 0 | 0  | 0 | 0  | 0 | 7 | 11 | 13 | 0 | 0 | 0 | 0  |
| 4  | 6  | 6  | 6  | 0 | 3  | 6 | 0  | 3 | 5 | 10 | 5  | 0 | 0 | 0 | 0  |
| 5  | 10 | 9  | 9  | 0 | 0  | 0 | 0  | 0 | 2 | 7  | 8  | 0 | 0 | 0 | 0  |
| 5  | 5  | 6  | 6  | 0 | 0  | 0 | 0  | 0 | 3 | 8  | 9  | 0 | 0 | 0 | 0  |
| 4  | 6  | 7  | 8  | 0 | 0  | 0 | 0  | 3 | 4 | 6  | 7  | 0 | 0 | 0 | 0  |
| 2  | 2  | 2  | 2  | 0 | 0  | 2 | 0  | 3 | 2 | 2  | 0  | 0 | 0 | 0 | 0  |
| 5  | 8  | 5  | 9  | 0 | 6  | 2 | 0  | 2 | 4 | 9  | 4  | 0 | 0 | 4 | 4  |
| 2  | 0  | 2  | 2  | 0 | 0  | 0 | 0  | 0 | 0 | 0  | 0  | 0 | 0 | 0 | 0  |
| 9  | 6  | 6  | 11 | 0 | 0  | 2 | 0  | 2 | 7 | 7  | 2  | 0 | 0 | 0 | 0  |
| 4  | 6  | 8  | 7  | 0 | 0  | 0 | 0  | 0 | 4 | 7  | 5  | 0 | 0 | 0 | 0  |
| 6  | 5  | 7  | 6  | 0 | 0  | 0 | 0  | 0 | 0 | 3  | 5  | 0 | 0 | 0 | 0  |
| 5  | 4  | 6  | 3  | 0 | 0  | 0 | 0  | 0 | 2 | 6  | 3  | 0 | 0 | 0 | 0  |
| 3  | 4  | 5  | 5  | 0 | 0  | 0 | 0  | 0 | 0 | 6  | 4  | 0 | 0 | 0 | 0  |
| 0  | 0  | 4  | 7  | 0 | 6  | 3 | 3  | 0 | 0 | 0  | 8  | 0 | 3 | 0 | 4  |
| 6  | 5  | 5  | 5  | 0 | 0  | 0 | 0  | 0 | 2 | 5  | 4  | 0 | 0 | 0 | 0  |
| 0  | 0  | 0  | 0  | 3 | 0  | 0 | 0  | 5 | 2 | 0  | 0  | 0 | 2 | 3 | 0  |
| 12 | 6  | 8  | 5  | 0 | 0  | 0 | 0  | 0 | 0 | 6  | 5  | 0 | 0 | 0 | 0  |
| 0  | 0  | 0  | 0  | 0 | 0  | 0 | 0  | 0 | 0 | 0  | 0  | 0 | 0 | 0 | 0  |
| 7  | 6  | 7  | 6  | 0 | 0  | 0 | 0  | 0 | 0 | 4  | 5  | 0 | 0 | 0 | 0  |
| 6  | 3  | 6  | 5  | 0 | 0  | 0 | 0  | 0 | 2 | 7  | 5  | 0 | 0 | 0 | 0  |
| 0  | 0  | 0  | 0  | 0 | 0  | 0 | 0  | 0 | 0 | 0  | 0  | 0 | 0 | 0 | 0  |
| 0  | 0  | 0  | 0  | 0 | 4  | 5 | 5  | 0 | 0 | 0  | 0  | 3 | 5 | 3 | 7  |
| 0  | 0  | 0  | 0  | 0 | 0  | 0 | 0  | 0 | 0 | 0  | 0  | 0 | 0 | 0 | 0  |
| 2  | 2  | 2  | 2  | 0 | 0  | 0 | 0  | 0 | 0 | 2  | 0  | 0 | 0 | 0 | 0  |
| 5  | 4  | 5  | 6  | 0 | 0  | 0 | 0  | 0 | 0 | 4  | 0  | 0 | 0 | 0 | 0  |



|    |   |   |    |   |    |    |    |   |   |    |   |   |   |   |   |
|----|---|---|----|---|----|----|----|---|---|----|---|---|---|---|---|
| 0  | 0 | 2 | 5  | 0 | 0  | 0  | 0  | 0 | 0 | 4  | 0 | 0 | 0 | 0 | 0 |
| 0  | 0 | 0 | 0  | 0 | 11 | 6  | 12 | 0 | 0 | 0  | 0 | 0 | 3 | 2 | 0 |
| 5  | 5 | 4 | 5  | 0 | 0  | 0  | 0  | 0 | 0 | 6  | 5 | 0 | 0 | 0 | 0 |
| 2  | 2 | 2 | 2  | 0 | 0  | 0  | 0  | 0 | 0 | 3  | 2 | 0 | 0 | 0 | 0 |
| 5  | 4 | 3 | 4  | 0 | 0  | 0  | 0  | 0 | 0 | 4  | 4 | 0 | 0 | 0 | 0 |
| 4  | 4 | 3 | 6  | 0 | 0  | 0  | 0  | 0 | 0 | 3  | 7 | 0 | 0 | 0 | 0 |
| 0  | 0 | 0 | 0  | 3 | 0  | 2  | 2  | 0 | 0 | 0  | 0 | 0 | 0 | 0 | 2 |
| 11 | 5 | 7 | 6  | 0 | 0  | 0  | 0  | 0 | 0 | 7  | 4 | 0 | 0 | 0 | 0 |
| 0  | 0 | 0 | 5  | 0 | 6  | 26 | 0  | 0 | 0 | 0  | 0 | 6 | 0 | 0 | 4 |
| 0  | 0 | 0 | 2  | 0 | 5  | 4  | 10 | 0 | 0 | 0  | 0 | 2 | 0 | 0 | 7 |
| 0  | 0 | 0 | 0  | 0 | 0  | 0  | 0  | 0 | 0 | 0  | 2 | 0 | 0 | 0 | 0 |
| 2  | 3 | 0 | 0  | 0 | 0  | 0  | 0  | 0 | 0 | 0  | 3 | 0 | 0 | 0 | 0 |
| 6  | 2 | 3 | 11 | 0 | 0  | 0  | 0  | 0 | 0 | 10 | 3 | 0 | 0 | 0 | 0 |
| 3  | 6 | 4 | 6  | 0 | 0  | 0  | 0  | 0 | 0 | 2  | 5 | 0 | 0 | 0 | 0 |
| 5  | 2 | 4 | 3  | 0 | 0  | 0  | 0  | 2 | 3 | 2  | 4 | 0 | 0 | 0 | 0 |
| 4  | 6 | 3 | 2  | 0 | 0  | 0  | 0  | 0 | 3 | 4  | 2 | 0 | 0 | 0 | 0 |
| 5  | 7 | 8 | 7  | 0 | 0  | 0  | 0  | 0 | 6 | 5  | 7 | 0 | 0 | 0 | 0 |
| 0  | 2 | 0 | 0  | 0 | 0  | 0  | 0  | 0 | 0 | 0  | 0 | 0 | 0 | 0 | 0 |
| 0  | 0 | 0 | 0  | 0 | 0  | 0  | 0  | 0 | 0 | 0  | 0 | 0 | 0 | 0 | 0 |
| 3  | 3 | 4 | 5  | 0 | 0  | 0  | 0  | 0 | 0 | 8  | 2 | 0 | 0 | 0 | 0 |
| 3  | 2 | 4 | 4  | 0 | 0  | 0  | 0  | 0 | 5 | 6  | 4 | 0 | 0 | 0 | 0 |
| 0  | 0 | 0 | 0  | 0 | 0  | 0  | 0  | 0 | 0 | 0  | 0 | 0 | 0 | 0 | 0 |
| 3  | 0 | 0 | 2  | 0 | 0  | 0  | 0  | 0 | 2 | 2  | 2 | 0 | 0 | 0 | 0 |
| 5  | 4 | 3 | 3  | 0 | 0  | 0  | 0  | 0 | 0 | 3  | 0 | 0 | 0 | 0 | 0 |
| 3  | 4 | 4 | 4  | 0 | 0  | 0  | 0  | 0 | 0 | 4  | 3 | 0 | 0 | 0 | 0 |
| 3  | 5 | 2 | 0  | 0 | 0  | 0  | 0  | 0 | 0 | 3  | 2 | 0 | 0 | 0 | 0 |
| 6  | 4 | 3 | 4  | 0 | 0  | 0  | 0  | 0 | 0 | 5  | 2 | 0 | 0 | 0 | 0 |
| 6  | 4 | 4 | 2  | 0 | 0  | 0  | 0  | 0 | 3 | 4  | 0 | 0 | 0 | 0 | 0 |
| 0  | 0 | 0 | 0  | 0 | 0  | 0  | 0  | 0 | 0 | 0  | 0 | 0 | 0 | 0 | 0 |
| 2  | 0 | 2 | 0  | 0 | 0  | 0  | 0  | 0 | 0 | 0  | 0 | 0 | 0 | 0 | 0 |
| 0  | 0 | 0 | 0  | 0 | 0  | 2  | 2  | 0 | 0 | 0  | 0 | 0 | 0 | 0 | 3 |
| 3  | 0 | 0 | 2  | 0 | 0  | 0  | 0  | 0 | 3 | 4  | 3 | 0 | 0 | 0 | 0 |
| 4  | 3 | 5 | 4  | 0 | 0  | 0  | 0  | 0 | 3 | 6  | 2 | 0 | 0 | 0 | 0 |
| 0  | 0 | 0 | 0  | 0 | 0  | 0  | 0  | 0 | 0 | 0  | 0 | 0 | 0 | 0 | 0 |
| 0  | 0 | 0 | 0  | 0 | 0  | 0  | 0  | 0 | 0 | 0  | 0 | 0 | 0 | 0 | 0 |
| 0  | 0 | 2 | 0  | 0 | 0  | 0  | 0  | 0 | 0 | 2  | 0 | 0 | 0 | 0 | 0 |
| 0  | 0 | 0 | 3  | 0 | 3  | 4  | 0  | 0 | 0 | 2  | 0 | 0 | 0 | 2 | 0 |
| 2  | 3 | 4 | 2  | 0 | 0  | 0  | 0  | 0 | 0 | 0  | 2 | 0 | 0 | 0 | 0 |
| 2  | 0 | 0 | 2  | 0 | 0  | 0  | 0  | 0 | 0 | 0  | 0 | 0 | 0 | 0 | 0 |
| 3  | 4 | 4 | 2  | 0 | 0  | 0  | 0  | 0 | 0 | 2  | 3 | 0 | 0 | 0 | 0 |
| 0  | 0 | 4 | 3  | 0 | 0  | 0  | 0  | 0 | 0 | 0  | 2 | 0 | 0 | 0 | 0 |
| 5  | 3 | 3 | 4  | 0 | 0  | 0  | 0  | 0 | 0 | 0  | 0 | 0 | 0 | 0 | 0 |
| 2  | 2 | 4 | 3  | 0 | 0  | 0  | 0  | 0 | 0 | 5  | 0 | 0 | 0 | 0 | 0 |
| 0  | 2 | 2 | 0  | 0 | 0  | 0  | 0  | 0 | 0 | 2  | 2 | 0 | 0 | 0 | 0 |
| 0  | 0 | 2 | 4  | 0 | 0  | 0  | 0  | 0 | 0 | 5  | 3 | 0 | 0 | 0 | 0 |
| 4  | 4 | 6 | 5  | 0 | 0  | 0  | 0  | 0 | 0 | 12 | 4 | 0 | 0 | 0 | 0 |
| 2  | 3 | 2 | 0  | 0 | 0  | 0  | 0  | 0 | 0 | 0  | 0 | 0 | 0 | 0 | 0 |
| 3  | 3 | 3 | 4  | 0 | 0  | 0  | 0  | 0 | 3 | 3  | 4 | 0 | 0 | 0 | 0 |
| 0  | 2 | 2 | 2  | 0 | 0  | 0  | 0  | 0 | 0 | 2  | 2 | 0 | 0 | 0 | 0 |

|   |   |   |   |   |   |   |   |   |   |   |   |   |   |   |
|---|---|---|---|---|---|---|---|---|---|---|---|---|---|---|
| 2 | 2 | 2 | 2 | 0 | 0 | 0 | 0 | 0 | 0 | 2 | 0 | 0 | 0 | 0 |
| 0 | 0 | 0 | 0 | 0 | 0 | 0 | 0 | 0 | 0 | 0 | 0 | 0 | 0 | 0 |
| 0 | 0 | 0 | 0 | 0 | 0 | 0 | 0 | 0 | 0 | 0 | 0 | 0 | 0 | 0 |
| 3 | 0 | 2 | 2 | 0 | 0 | 0 | 0 | 0 | 0 | 3 | 0 | 0 | 0 | 0 |
| 0 | 3 | 0 | 0 | 0 | 0 | 0 | 0 | 0 | 0 | 0 | 0 | 0 | 0 | 0 |
| 3 | 0 | 3 | 4 | 0 | 0 | 0 | 0 | 0 | 0 | 0 | 0 | 0 | 0 | 0 |
| 2 | 0 | 0 | 2 | 0 | 0 | 2 | 0 | 0 | 0 | 0 | 3 | 0 | 0 | 0 |
| 0 | 0 | 0 | 0 | 0 | 0 | 0 | 0 | 0 | 0 | 0 | 0 | 0 | 0 | 0 |
| 3 | 0 | 3 | 0 | 0 | 0 | 0 | 0 | 0 | 0 | 0 | 0 | 0 | 0 | 0 |
| 0 | 3 | 0 | 2 | 0 | 0 | 0 | 0 | 0 | 3 | 0 | 0 | 0 | 0 | 0 |
| 0 | 0 | 0 | 0 | 0 | 0 | 0 | 0 | 0 | 0 | 0 | 0 | 0 | 0 | 0 |
| 2 | 3 | 2 | 2 | 0 | 0 | 0 | 0 | 0 | 0 | 3 | 3 | 0 | 0 | 0 |
| 3 | 0 | 0 | 2 | 0 | 0 | 0 | 0 | 0 | 0 | 2 | 3 | 0 | 0 | 0 |
| 0 | 0 | 0 | 0 | 0 | 0 | 0 | 0 | 0 | 0 | 0 | 0 | 0 | 0 | 0 |
| 2 | 0 | 0 | 0 | 0 | 0 | 0 | 0 | 0 | 0 | 0 | 3 | 0 | 0 | 0 |
| 2 | 2 | 0 | 2 | 0 | 0 | 0 | 0 | 0 | 0 | 3 | 0 | 0 | 0 | 0 |
| 2 | 2 | 0 | 0 | 0 | 0 | 0 | 0 | 0 | 0 | 2 | 0 | 0 | 0 | 0 |
| 3 | 0 | 2 | 3 | 0 | 0 | 0 | 0 | 0 | 0 | 3 | 3 | 0 | 0 | 0 |
| 2 | 0 | 0 | 0 | 0 | 0 | 0 | 0 | 0 | 0 | 2 | 0 | 0 | 0 | 0 |
| 3 | 0 | 0 | 0 | 0 | 0 | 0 | 0 | 0 | 0 | 2 | 0 | 0 | 0 | 0 |
| 2 | 0 | 0 | 0 | 0 | 0 | 0 | 0 | 0 | 0 | 0 | 2 | 0 | 0 | 0 |
| 0 | 0 | 0 | 0 | 0 | 0 | 0 | 0 | 0 | 0 | 2 | 0 | 0 | 0 | 0 |
| 2 | 0 | 3 | 4 | 0 | 0 | 0 | 0 | 0 | 0 | 3 | 2 | 0 | 0 | 0 |
| 0 | 0 | 0 | 0 | 0 | 0 | 0 | 0 | 0 | 0 | 0 | 0 | 0 | 0 | 0 |
| 0 | 2 | 0 | 2 | 0 | 0 | 0 | 0 | 0 | 2 | 0 | 0 | 0 | 0 | 0 |
| 0 | 0 | 0 | 0 | 0 | 0 | 0 | 0 | 0 | 0 | 0 | 0 | 0 | 0 | 0 |
| 0 | 0 | 7 | 0 | 0 | 0 | 0 | 0 | 0 | 2 | 0 | 4 | 0 | 0 | 0 |
| 0 | 2 | 2 | 2 | 0 | 0 | 0 | 0 | 0 | 2 | 2 | 2 | 0 | 0 | 0 |
| 0 | 2 | 0 | 2 | 0 | 0 | 0 | 0 | 0 | 2 | 0 | 0 | 0 | 0 | 0 |
| 3 | 2 | 2 | 0 | 0 | 0 | 0 | 0 | 0 | 0 | 2 | 0 | 0 | 0 | 0 |
| 2 | 2 | 0 | 0 | 0 | 0 | 0 | 0 | 0 | 0 | 2 | 0 | 0 | 0 | 0 |
| 2 | 2 | 3 | 2 | 0 | 0 | 0 | 0 | 0 | 0 | 0 | 2 | 0 | 0 | 0 |
| 0 | 0 | 0 | 0 | 0 | 0 | 0 | 0 | 0 | 0 | 0 | 0 | 0 | 0 | 0 |
| 0 | 2 | 2 | 2 | 0 | 0 | 0 | 0 | 0 | 0 | 2 | 2 | 0 | 0 | 0 |
| 0 | 0 | 2 | 2 | 0 | 0 | 0 | 0 | 0 | 0 | 0 | 0 | 0 | 0 | 0 |
| 2 | 3 | 2 | 0 | 0 | 0 | 0 | 0 | 0 | 2 | 4 | 2 | 0 | 0 | 0 |
| 0 | 2 | 4 | 2 | 0 | 0 | 0 | 0 | 0 | 0 | 6 | 0 | 0 | 0 | 0 |
| 0 | 0 | 0 | 0 | 0 | 0 | 0 | 0 | 0 | 0 | 0 | 0 | 0 | 0 | 0 |
| 0 | 0 | 0 | 0 | 0 | 0 | 0 | 0 | 0 | 0 | 0 | 0 | 0 | 0 | 0 |
| 2 | 0 | 0 | 0 | 0 | 0 | 0 | 0 | 0 | 0 | 0 | 0 | 0 | 0 | 0 |
| 3 | 4 | 0 | 0 | 0 | 0 | 0 | 0 | 0 | 0 | 2 | 0 | 0 | 0 | 0 |
| 3 | 0 | 4 | 2 | 0 | 0 | 0 | 0 | 0 | 0 | 0 | 0 | 0 | 0 | 0 |
| 0 | 2 | 2 | 4 | 0 | 0 | 0 | 0 | 0 | 0 | 0 | 0 | 0 | 0 | 0 |
| 2 | 0 | 2 | 0 | 0 | 0 | 0 | 0 | 0 | 0 | 0 | 0 | 0 | 0 | 0 |
| 2 | 2 | 0 | 2 | 0 | 0 | 0 | 0 | 0 | 0 | 2 | 0 | 0 | 0 | 0 |
| 3 | 0 | 0 | 0 | 0 | 0 | 0 | 0 | 0 | 0 | 0 | 0 | 0 | 0 | 0 |
| 3 | 2 | 0 | 2 | 0 | 0 | 0 | 0 | 0 | 0 | 2 | 6 | 0 | 0 | 0 |
| 0 | 0 | 0 | 0 | 0 | 0 | 0 | 0 | 0 | 0 | 0 | 0 | 0 | 0 | 0 |
| 0 | 0 | 3 | 3 | 0 | 0 | 0 | 0 | 0 | 0 | 3 | 2 | 0 | 0 | 0 |



| Mongolian Hair ----- |       |       |       |                   |       |       |       |                    |      |      |      |                   |      |      |      |
|----------------------|-------|-------|-------|-------------------|-------|-------|-------|--------------------|------|------|------|-------------------|------|------|------|
| Low Arsenic -----    |       |       |       |                   |       |       |       | High Arsenic ----- |      |      |      |                   |      |      |      |
| Insoluble -----      |       |       |       | Solubilized ----- |       |       |       | Insoluble -----    |      |      |      | Solubilized ----- |      |      |      |
| C128P                | C129P | C130P | C133P | C128S             | C129S | C130S | C133S | A3P                | A15P | A24P | A25P | A3S               | A15S | A24S | A25S |
| 48                   | 64    | 44    | 47    | 92                | 72    | 76    | 78    | 60                 | 44   | 49   | 85   | 91                | 82   | 93   | 80   |
| 29                   | 40    | 21    | 26    | 59                | 55    | 57    | 57    | 29                 | 24   | 31   | 55   | 66                | 61   | 64   | 64   |
| 19                   | 27    | 21    | 16    | 34                | 34    | 34    | 33    | 23                 | 23   | 27   | 33   | 35                | 38   | 37   | 34   |
| 66                   | 46    | 58    | 58    | 9                 | 3     | 12    | 2     | 53                 | 68   | 75   | 43   | 9                 | 5    | 10   | 7    |
| 14                   | 16    | 10    | 11    | 26                | 21    | 21    | 17    | 16                 | 12   | 11   | 25   | 23                | 23   | 26   | 24   |
| 15                   | 17    | 10    | 15    | 23                | 12    | 19    | 16    | 15                 | 14   | 19   | 22   | 20                | 25   | 25   | 15   |
| 4                    | 0     | 0     | 2     | 0                 | 0     | 0     | 0     | 0                  | 0    | 10   | 0    | 0                 | 0    | 0    | 0    |
| 0                    | 0     | 0     | 0     | 0                 | 0     | 0     | 0     | 0                  | 0    | 0    | 0    | 0                 | 0    | 0    | 0    |
| 10                   | 0     | 7     | 10    | 0                 | 0     | 0     | 0     | 10                 | 11   | 13   | 4    | 0                 | 0    | 0    | 0    |
| 0                    | 0     | 0     | 0     | 0                 | 0     | 0     | 0     | 0                  | 0    | 0    | 0    | 0                 | 0    | 0    | 0    |
| 0                    | 0     | 0     | 0     | 0                 | 0     | 0     | 0     | 0                  | 0    | 0    | 0    | 0                 | 0    | 0    | 0    |
| 3                    | 3     | 2     | 2     | 7                 | 6     | 6     | 7     | 4                  | 0    | 2    | 4    | 7                 | 5    | 9    | 5    |
| 25                   | 13    | 18    | 16    | 4                 | 0     | 4     | 0     | 17                 | 22   | 26   | 19   | 0                 | 0    | 3    | 0    |
| 0                    | 0     | 0     | 0     | 0                 | 0     | 0     | 0     | 0                  | 0    | 0    | 0    | 0                 | 0    | 0    | 0    |
| 0                    | 0     | 0     | 0     | 0                 | 0     | 0     | 0     | 0                  | 0    | 0    | 0    | 0                 | 0    | 0    | 0    |
| 0                    | 0     | 0     | 0     | 0                 | 0     | 0     | 0     | 0                  | 0    | 0    | 0    | 0                 | 0    | 0    | 0    |
| 21                   | 14    | 18    | 20    | 0                 | 0     | 0     | 0     | 24                 | 22   | 24   | 16   | 0                 | 0    | 0    | 0    |
| 2                    | 0     | 2     | 2     | 0                 | 0     | 0     | 0     | 0                  | 3    | 3    | 4    | 0                 | 0    | 0    | 0    |
| 47                   | 16    | 45    | 47    | 3                 | 0     | 3     | 0     | 45                 | 51   | 48   | 29   | 0                 | 5    | 2    | 0    |
| 14                   | 0     | 13    | 13    | 3                 | 0     | 0     | 0     | 15                 | 16   | 16   | 8    | 2                 | 7    | 5    | 3    |
| 27                   | 14    | 18    | 22    | 3                 | 0     | 2     | 0     | 28                 | 23   | 23   | 16   | 0                 | 3    | 2    | 0    |
| 3                    | 8     | 0     | 0     | 11                | 12    | 12    | 12    | 7                  | 6    | 7    | 13   | 14                | 13   | 14   | 14   |
| 6                    | 7     | 4     | 6     | 11                | 9     | 9     | 5     | 5                  | 5    | 4    | 8    | 10                | 9    | 8    | 6    |
| 0                    | 3     | 4     | 4     | 2                 | 0     | 0     | 0     | 5                  | 3    | 4    | 0    | 0                 | 2    | 2    | 3    |
| 3                    | 0     | 2     | 2     | 6                 | 8     | 7     | 7     | 0                  | 3    | 0    | 2    | 6                 | 9    | 8    | 8    |
| 7                    | 4     | 10    | 6     | 0                 | 0     | 2     | 0     | 9                  | 9    | 9    | 4    | 2                 | 3    | 0    | 2    |
| 22                   | 8     | 11    | 13    | 4                 | 0     | 0     | 0     | 18                 | 23   | 20   | 22   | 3                 | 7    | 9    | 10   |
| 0                    | 0     | 0     | 0     | 0                 | 0     | 0     | 0     | 0                  | 0    | 0    | 0    | 0                 | 0    | 0    | 0    |
| 5                    | 2     | 5     | 5     | 0                 | 0     | 0     | 0     | 5                  | 4    | 5    | 0    | 0                 | 0    | 0    | 0    |
| 12                   | 6     | 12    | 15    | 26                | 18    | 15    | 15    | 18                 | 21   | 16   | 15   | 19                | 22   | 19   | 20   |
| 14                   | 10    | 13    | 9     | 6                 | 0     | 4     | 0     | 10                 | 13   | 14   | 9    | 0                 | 4    | 3    | 5    |
| 10                   | 5     | 7     | 11    | 3                 | 4     | 0     | 3     | 14                 | 11   | 17   | 7    | 4                 | 5    | 5    | 3    |
| 3                    | 0     | 2     | 3     | 0                 | 0     | 0     | 0     | 0                  | 0    | 0    | 0    | 0                 | 0    | 0    | 0    |
| 4                    | 2     | 6     | 3     | 0                 | 0     | 0     | 0     | 7                  | 7    | 4    | 4    | 0                 | 6    | 0    | 3    |
| 12                   | 3     | 6     | 7     | 0                 | 0     | 0     | 0     | 8                  | 6    | 10   | 7    | 0                 | 0    | 0    | 0    |
| 11                   | 6     | 7     | 10    | 14                | 6     | 5     | 6     | 13                 | 14   | 14   | 9    | 10                | 11   | 6    | 10   |
| 0                    | 0     | 0     | 0     | 0                 | 0     | 0     | 0     | 0                  | 0    | 0    | 0    | 0                 | 0    | 0    | 0    |
| 0                    | 0     | 0     | 0     | 4                 | 2     | 3     | 4     | 0                  | 0    | 0    | 0    | 0                 | 3    | 3    | 3    |
| 4                    | 8     | 2     | 3     | 8                 | 8     | 7     | 8     | 3                  | 0    | 3    | 7    | 6                 | 10   | 6    | 4    |
| 12                   | 6     | 8     | 8     | 2                 | 0     | 2     | 0     | 7                  | 9    | 11   | 6    | 3                 | 3    | 3    | 6    |
| 13                   | 10    | 8     | 10    | 5                 | 0     | 5     | 5     | 11                 | 12   | 14   | 9    | 7                 | 3    | 4    | 5    |
| 6                    | 4     | 3     | 5     | 0                 | 0     | 0     | 0     | 8                  | 7    | 9    | 4    | 0                 | 0    | 0    | 0    |
| 0                    | 3     | 0     | 0     | 8                 | 8     | 8     | 5     | 0                  | 0    | 0    | 3    | 8                 | 7    | 9    | 10   |
| 0                    | 0     | 0     | 0     | 0                 | 0     | 0     | 0     | 0                  | 0    | 0    | 0    | 0                 | 0    | 0    | 0    |
| 7                    | 4     | 9     | 8     | 4                 | 0     | 4     | 3     | 9                  | 13   | 9    | 5    | 0                 | 5    | 3    | 2    |

|    |   |   |   |   |   |   |   |    |    |    |   |   |   |   |   |
|----|---|---|---|---|---|---|---|----|----|----|---|---|---|---|---|
| 6  | 4 | 4 | 5 | 0 | 0 | 0 | 0 | 5  | 8  | 7  | 5 | 0 | 0 | 0 | 0 |
| 3  | 0 | 3 | 2 | 0 | 0 | 0 | 0 | 0  | 5  | 3  | 2 | 0 | 0 | 0 | 0 |
| 6  | 3 | 5 | 5 | 0 | 0 | 0 | 0 | 4  | 6  | 7  | 3 | 0 | 0 | 0 | 0 |
| 7  | 0 | 8 | 6 | 0 | 0 | 0 | 0 | 8  | 7  | 6  | 0 | 0 | 0 | 0 | 0 |
| 6  | 0 | 8 | 9 | 0 | 0 | 0 | 0 | 2  | 11 | 9  | 0 | 0 | 0 | 0 | 0 |
| 0  | 0 | 5 | 6 | 0 | 0 | 0 | 0 | 0  | 4  | 2  | 2 | 0 | 0 | 0 | 0 |
| 4  | 0 | 4 | 4 | 0 | 0 | 0 | 0 | 4  | 4  | 6  | 3 | 0 | 3 | 0 | 0 |
| 4  | 5 | 4 | 4 | 0 | 0 | 0 | 2 | 4  | 3  | 6  | 5 | 3 | 3 | 2 | 2 |
| 6  | 7 | 7 | 5 | 0 | 0 | 0 | 0 | 9  | 4  | 4  | 2 | 0 | 0 | 0 | 0 |
| 0  | 0 | 0 | 0 | 0 | 0 | 0 | 0 | 0  | 0  | 0  | 0 | 0 | 0 | 0 | 0 |
| 0  | 0 | 0 | 0 | 0 | 0 | 0 | 0 | 0  | 0  | 0  | 0 | 0 | 0 | 0 | 0 |
| 2  | 0 | 0 | 2 | 0 | 0 | 0 | 0 | 3  | 3  | 6  | 0 | 0 | 0 | 0 | 0 |
| 2  | 0 | 2 | 2 | 0 | 0 | 0 | 0 | 0  | 2  | 3  | 0 | 0 | 0 | 0 | 0 |
| 3  | 2 | 2 | 2 | 0 | 0 | 0 | 0 | 3  | 2  | 5  | 3 | 0 | 0 | 0 | 0 |
| 4  | 3 | 3 | 0 | 0 | 0 | 0 | 0 | 0  | 2  | 5  | 4 | 0 | 0 | 0 | 0 |
| 3  | 0 | 5 | 3 | 0 | 0 | 0 | 0 | 0  | 2  | 2  | 0 | 0 | 0 | 0 | 0 |
| 5  | 4 | 6 | 5 | 0 | 0 | 0 | 0 | 6  | 7  | 6  | 0 | 0 | 0 | 0 | 0 |
| 9  | 6 | 4 | 5 | 0 | 0 | 0 | 0 | 8  | 6  | 9  | 6 | 0 | 0 | 0 | 0 |
| 0  | 3 | 0 | 0 | 5 | 3 | 5 | 4 | 0  | 0  | 2  | 2 | 5 | 5 | 6 | 4 |
| 6  | 3 | 4 | 4 | 0 | 0 | 0 | 0 | 6  | 6  | 5  | 2 | 0 | 0 | 0 | 0 |
| 4  | 2 | 7 | 2 | 0 | 0 | 0 | 0 | 6  | 6  | 8  | 2 | 0 | 0 | 0 | 0 |
| 10 | 2 | 8 | 8 | 0 | 0 | 0 | 0 | 7  | 9  | 9  | 4 | 0 | 0 | 0 | 0 |
| 5  | 3 | 4 | 2 | 3 | 0 | 0 | 0 | 5  | 8  | 7  | 4 | 0 | 4 | 3 | 0 |
| 3  | 0 | 2 | 0 | 0 | 0 | 0 | 0 | 2  | 2  | 2  | 0 | 0 | 0 | 0 | 0 |
| 0  | 0 | 0 | 0 | 0 | 0 | 0 | 0 | 0  | 0  | 0  | 0 | 0 | 0 | 0 | 0 |
| 2  | 0 | 2 | 0 | 0 | 0 | 0 | 0 | 0  | 2  | 0  | 0 | 0 | 0 | 0 | 0 |
| 0  | 0 | 0 | 0 | 0 | 0 | 0 | 0 | 0  | 0  | 0  | 0 | 0 | 0 | 0 | 0 |
| 5  | 0 | 4 | 4 | 0 | 0 | 0 | 0 | 3  | 4  | 5  | 5 | 0 | 0 | 0 | 0 |
| 2  | 0 | 6 | 2 | 0 | 0 | 0 | 0 | 2  | 4  | 2  | 0 | 0 | 0 | 0 | 0 |
| 0  | 0 | 0 | 0 | 2 | 0 | 0 | 2 | 2  | 0  | 0  | 2 | 0 | 2 | 0 | 2 |
| 0  | 0 | 0 | 2 | 0 | 0 | 0 | 0 | 0  | 4  | 4  | 0 | 0 | 0 | 0 | 2 |
| 4  | 2 | 3 | 0 | 2 | 0 | 0 | 0 | 3  | 0  | 0  | 2 | 0 | 0 | 0 | 4 |
| 4  | 3 | 2 | 2 | 0 | 0 | 0 | 0 | 3  | 2  | 8  | 3 | 0 | 0 | 0 | 0 |
| 0  | 0 | 0 | 0 | 0 | 0 | 0 | 0 | 0  | 0  | 0  | 0 | 0 | 0 | 0 | 0 |
| 2  | 0 | 5 | 2 | 0 | 0 | 0 | 0 | 5  | 3  | 5  | 0 | 0 | 0 | 0 | 0 |
| 7  | 3 | 4 | 2 | 0 | 0 | 0 | 0 | 5  | 4  | 7  | 4 | 0 | 0 | 0 | 0 |
| 3  | 0 | 2 | 0 | 0 | 0 | 0 | 0 | 3  | 3  | 0  | 0 | 0 | 0 | 0 | 0 |
| 0  | 0 | 0 | 0 | 0 | 0 | 0 | 0 | 0  | 0  | 0  | 0 | 0 | 0 | 0 | 0 |
| 4  | 0 | 2 | 2 | 0 | 0 | 0 | 0 | 3  | 3  | 4  | 2 | 0 | 0 | 0 | 0 |
| 0  | 0 | 0 | 0 | 2 | 4 | 0 | 0 | 0  | 0  | 0  | 0 | 3 | 2 | 0 | 4 |
| 0  | 0 | 0 | 0 | 0 | 0 | 0 | 0 | 0  | 0  | 0  | 0 | 0 | 0 | 0 | 0 |
| 8  | 0 | 8 | 7 | 0 | 0 | 0 | 0 | 12 | 9  | 8  | 5 | 0 | 2 | 0 | 0 |
| 8  | 0 | 4 | 3 | 0 | 0 | 0 | 0 | 6  | 10 | 6  | 0 | 0 | 0 | 0 | 0 |
| 2  | 0 | 4 | 3 | 0 | 0 | 0 | 0 | 2  | 2  | 4  | 0 | 0 | 0 | 0 | 0 |
| 7  | 0 | 4 | 5 | 0 | 0 | 0 | 0 | 5  | 8  | 11 | 0 | 0 | 0 | 0 | 0 |
| 0  | 0 | 0 | 0 | 0 | 0 | 0 | 0 | 0  | 0  | 0  | 0 | 0 | 0 | 0 | 0 |
| 7  | 4 | 5 | 8 | 0 | 0 | 0 | 0 | 7  | 7  | 8  | 3 | 0 | 2 | 0 | 0 |
| 2  | 0 | 0 | 0 | 0 | 0 | 0 | 0 | 2  | 2  | 2  | 0 | 0 | 0 | 0 | 0 |
| 4  | 2 | 5 | 2 | 0 | 0 | 0 | 0 | 4  | 7  | 4  | 0 | 0 | 0 | 0 | 0 |

|   |   |   |   |   |   |   |   |    |   |   |   |   |   |   |   |
|---|---|---|---|---|---|---|---|----|---|---|---|---|---|---|---|
| 5 | 4 | 7 | 5 | 0 | 0 | 0 | 0 | 4  | 6 | 7 | 4 | 0 | 0 | 0 | 0 |
| 0 | 0 | 0 | 0 | 0 | 0 | 0 | 0 | 0  | 0 | 0 | 0 | 0 | 0 | 0 | 0 |
| 2 | 0 | 0 | 0 | 0 | 0 | 0 | 0 | 0  | 0 | 0 | 0 | 0 | 0 | 0 | 0 |
| 5 | 3 | 6 | 5 | 0 | 0 | 0 | 0 | 4  | 4 | 7 | 4 | 0 | 0 | 0 | 0 |
| 2 | 0 | 0 | 0 | 0 | 0 | 0 | 0 | 0  | 0 | 0 | 0 | 0 | 0 | 0 | 0 |
| 3 | 0 | 2 | 3 | 0 | 0 | 0 | 0 | 2  | 4 | 2 | 2 | 0 | 0 | 0 | 0 |
| 0 | 0 | 0 | 0 | 3 | 0 | 0 | 2 | 0  | 0 | 0 | 0 | 0 | 2 | 0 | 2 |
| 2 | 0 | 0 | 0 | 0 | 0 | 0 | 0 | 2  | 0 | 0 | 0 | 0 | 0 | 0 | 0 |
| 0 | 0 | 0 | 0 | 0 | 0 | 0 | 0 | 0  | 0 | 0 | 0 | 0 | 0 | 0 | 0 |
| 0 | 0 | 0 | 0 | 0 | 0 | 0 | 0 | 0  | 0 | 0 | 0 | 0 | 0 | 0 | 0 |
| 2 | 0 | 2 | 0 | 0 | 0 | 0 | 0 | 2  | 2 | 2 | 0 | 3 | 4 | 4 | 0 |
| 2 | 3 | 2 | 2 | 0 | 0 | 0 | 0 | 3  | 2 | 3 | 3 | 0 | 0 | 0 | 0 |
| 0 | 0 | 0 | 0 | 0 | 0 | 0 | 0 | 0  | 0 | 0 | 0 | 0 | 0 | 0 | 0 |
| 0 | 0 | 4 | 4 | 0 | 0 | 0 | 0 | 2  | 2 | 3 | 0 | 0 | 0 | 0 | 0 |
| 0 | 0 | 3 | 2 | 0 | 0 | 0 | 0 | 0  | 5 | 0 | 0 | 0 | 0 | 0 | 0 |
| 3 | 0 | 2 | 3 | 0 | 0 | 0 | 0 | 2  | 4 | 7 | 0 | 0 | 0 | 0 | 0 |
| 0 | 0 | 0 | 0 | 0 | 0 | 0 | 0 | 0  | 0 | 0 | 0 | 0 | 0 | 0 | 0 |
| 6 | 0 | 2 | 3 | 0 | 0 | 0 | 0 | 4  | 8 | 5 | 0 | 0 | 0 | 0 | 0 |
| 0 | 0 | 2 | 2 | 0 | 0 | 0 | 0 | 4  | 6 | 4 | 0 | 0 | 0 | 0 | 0 |
| 0 | 0 | 0 | 0 | 0 | 0 | 0 | 0 | 0  | 0 | 0 | 0 | 0 | 0 | 0 | 0 |
| 3 | 0 | 2 | 2 | 0 | 0 | 0 | 0 | 3  | 4 | 3 | 0 | 0 | 0 | 0 | 0 |
| 7 | 0 | 5 | 6 | 0 | 0 | 0 | 0 | 10 | 9 | 5 | 0 | 0 | 0 | 0 | 0 |
| 4 | 3 | 6 | 2 | 0 | 0 | 0 | 0 | 3  | 5 | 3 | 0 | 0 | 0 | 0 | 0 |
| 2 | 0 | 0 | 2 | 0 | 0 | 0 | 0 | 2  | 3 | 0 | 0 | 0 | 0 | 0 | 0 |
| 0 | 0 | 0 | 0 | 0 | 0 | 0 | 0 | 0  | 0 | 2 | 0 | 0 | 0 | 0 | 0 |
| 3 | 0 | 3 | 3 | 0 | 0 | 0 | 0 | 3  | 0 | 2 | 0 | 0 | 0 | 0 | 0 |
| 2 | 0 | 2 | 2 | 0 | 0 | 0 | 0 | 0  | 2 | 2 | 0 | 0 | 0 | 0 | 0 |
| 0 | 0 | 0 | 0 | 0 | 0 | 0 | 0 | 0  | 0 | 0 | 0 | 0 | 0 | 0 | 0 |
| 0 | 0 | 0 | 0 | 3 | 0 | 4 | 0 | 0  | 0 | 0 | 5 | 5 | 3 | 6 | 6 |
| 3 | 3 | 6 | 5 | 0 | 0 | 0 | 0 | 3  | 4 | 4 | 2 | 0 | 0 | 0 | 0 |
| 0 | 0 | 0 | 0 | 0 | 0 | 0 | 0 | 0  | 0 | 0 | 0 | 0 | 0 | 0 | 0 |
| 3 | 0 | 2 | 4 | 0 | 0 | 0 | 0 | 3  | 5 | 5 | 0 | 0 | 0 | 0 | 0 |
| 2 | 0 | 2 | 3 | 0 | 0 | 0 | 0 | 0  | 0 | 0 | 0 | 0 | 0 | 0 | 0 |
| 5 | 0 | 2 | 3 | 0 | 0 | 0 | 0 | 3  | 9 | 5 | 3 | 0 | 2 | 0 | 0 |
| 0 | 0 | 2 | 5 | 0 | 0 | 0 | 0 | 5  | 8 | 4 | 0 | 0 | 0 | 0 | 0 |
| 5 | 0 | 0 | 2 | 0 | 0 | 0 | 0 | 2  | 2 | 4 | 0 | 0 | 0 | 0 | 0 |
| 0 | 0 | 0 | 0 | 0 | 0 | 0 | 0 | 0  | 0 | 0 | 0 | 0 | 0 | 0 | 0 |
| 0 | 0 | 0 | 0 | 0 | 0 | 0 | 0 | 0  | 0 | 0 | 0 | 0 | 0 | 0 | 0 |
| 0 | 0 | 2 | 2 | 0 | 0 | 0 | 0 | 2  | 3 | 3 | 0 | 0 | 0 | 0 | 0 |
| 0 | 0 | 0 | 0 | 0 | 0 | 0 | 0 | 0  | 2 | 0 | 0 | 0 | 0 | 0 | 0 |
| 0 | 0 | 0 | 0 | 0 | 0 | 0 | 0 | 0  | 2 | 3 | 0 | 0 | 0 | 0 | 0 |
| 2 | 0 | 0 | 2 | 0 | 0 | 0 | 0 | 0  | 2 | 3 | 0 | 0 | 0 | 0 | 0 |
| 0 | 0 | 2 | 0 | 0 | 0 | 0 | 0 | 0  | 2 | 0 | 0 | 0 | 0 | 0 | 0 |
| 0 | 0 | 0 | 0 | 0 | 0 | 0 | 0 | 0  | 2 | 2 | 0 | 0 | 0 | 0 | 0 |
| 2 | 0 | 0 | 2 | 0 | 0 | 0 | 0 | 3  | 2 | 2 | 0 | 0 | 0 | 0 | 0 |
| 0 | 0 | 0 | 0 | 0 | 0 | 0 | 0 | 0  | 0 | 0 | 0 | 0 | 0 | 0 | 0 |
| 3 | 0 | 3 | 7 | 0 | 0 | 0 | 0 | 4  | 8 | 3 | 0 | 0 | 0 | 0 | 0 |
| 0 | 0 | 4 | 0 | 0 | 0 | 0 | 0 | 0  | 0 | 0 | 0 | 0 | 0 | 0 | 0 |
| 2 | 0 | 0 | 2 | 0 | 0 | 0 | 0 | 2  | 2 | 2 | 0 | 0 | 0 | 0 | 0 |



|   |   |   |   |   |   |   |   |   |   |   |   |   |   |   |
|---|---|---|---|---|---|---|---|---|---|---|---|---|---|---|
| 3 | 0 | 2 | 2 | 0 | 0 | 0 | 0 | 0 | 0 | 2 | 0 | 0 | 0 | 0 |
| 0 | 0 | 0 | 0 | 0 | 0 | 0 | 0 | 0 | 0 | 0 | 0 | 0 | 0 | 0 |
| 2 | 0 | 0 | 2 | 0 | 0 | 0 | 0 | 0 | 0 | 0 | 0 | 0 | 0 | 0 |
| 0 | 0 | 0 | 0 | 0 | 0 | 0 | 0 | 2 | 3 | 2 | 0 | 0 | 0 | 0 |
| 0 | 0 | 0 | 0 | 0 | 0 | 0 | 0 | 0 | 0 | 0 | 0 | 0 | 0 | 0 |
| 0 | 0 | 0 | 0 | 0 | 0 | 0 | 0 | 0 | 0 | 0 | 0 | 0 | 0 | 0 |
| 2 | 0 | 0 | 2 | 0 | 0 | 0 | 0 | 0 | 0 | 2 | 0 | 0 | 0 | 0 |
| 0 | 0 | 0 | 0 | 0 | 0 | 0 | 0 | 0 | 0 | 0 | 0 | 0 | 0 | 0 |
| 0 | 0 | 0 | 0 | 0 | 0 | 0 | 0 | 0 | 0 | 0 | 0 | 0 | 0 | 0 |
| 2 | 0 | 2 | 3 | 0 | 0 | 0 | 0 | 2 | 2 | 0 | 0 | 0 | 0 | 0 |
| 0 | 0 | 0 | 0 | 0 | 0 | 0 | 0 | 0 | 0 | 0 | 0 | 0 | 0 | 0 |
| 2 | 0 | 0 | 0 | 0 | 0 | 0 | 0 | 0 | 2 | 0 | 0 | 0 | 0 | 0 |
| 2 | 0 | 2 | 0 | 0 | 0 | 0 | 0 | 0 | 4 | 0 | 0 | 0 | 0 | 0 |
| 0 | 0 | 0 | 0 | 0 | 0 | 0 | 0 | 0 | 0 | 0 | 0 | 0 | 0 | 0 |
| 2 | 0 | 0 | 0 | 5 | 0 | 3 | 0 | 2 | 0 | 0 | 2 | 0 | 0 | 0 |
| 0 | 0 | 0 | 0 | 0 | 0 | 0 | 0 | 2 | 0 | 0 | 0 | 0 | 0 | 0 |
| 2 | 3 | 2 | 2 | 0 | 0 | 0 | 0 | 2 | 0 | 3 | 0 | 0 | 0 | 0 |
| 2 | 0 | 0 | 2 | 0 | 0 | 0 | 0 | 2 | 2 | 2 | 0 | 0 | 0 | 0 |
| 0 | 0 | 0 | 0 | 0 | 0 | 0 | 0 | 0 | 0 | 0 | 0 | 0 | 0 | 0 |
| 3 | 0 | 0 | 2 | 0 | 0 | 0 | 0 | 0 | 0 | 0 | 0 | 0 | 0 | 0 |
| 4 | 0 | 2 | 3 | 0 | 0 | 0 | 0 | 0 | 2 | 5 | 0 | 0 | 0 | 0 |
| 0 | 0 | 2 | 2 | 0 | 0 | 0 | 0 | 0 | 3 | 0 | 2 | 0 | 0 | 0 |
| 2 | 0 | 0 | 0 | 0 | 0 | 0 | 0 | 0 | 0 | 0 | 0 | 0 | 0 | 0 |
| 2 | 0 | 0 | 2 | 0 | 0 | 0 | 0 | 3 | 0 | 2 | 0 | 0 | 0 | 0 |
| 2 | 2 | 0 | 0 | 0 | 0 | 0 | 0 | 0 | 0 | 0 | 0 | 0 | 0 | 0 |
| 0 | 0 | 0 | 2 | 0 | 0 | 0 | 0 | 2 | 0 | 2 | 0 | 0 | 0 | 0 |
| 0 | 0 | 0 | 0 | 0 | 0 | 0 | 0 | 0 | 2 | 2 | 0 | 0 | 0 | 0 |
| 2 | 0 | 2 | 0 | 0 | 0 | 0 | 0 | 2 | 3 | 2 | 0 | 0 | 0 | 0 |
| 2 | 0 | 0 | 0 | 0 | 0 | 0 | 0 | 0 | 2 | 2 | 0 | 0 | 0 | 0 |
| 0 | 0 | 0 | 0 | 0 | 0 | 0 | 0 | 0 | 0 | 0 | 0 | 0 | 0 | 0 |
| 0 | 0 | 0 | 0 | 0 | 0 | 0 | 0 | 0 | 0 | 0 | 0 | 0 | 0 | 0 |
| 2 | 0 | 2 | 0 | 0 | 0 | 0 | 0 | 2 | 0 | 0 | 0 | 0 | 0 | 0 |
| 2 | 0 | 3 | 0 | 0 | 0 | 0 | 0 | 2 | 0 | 0 | 0 | 0 | 0 | 0 |
| 0 | 0 | 0 | 0 | 0 | 0 | 0 | 0 | 0 | 0 | 0 | 0 | 0 | 0 | 0 |
| 0 | 0 | 0 | 0 | 0 | 0 | 0 | 0 | 2 | 2 | 0 | 0 | 0 | 0 | 0 |
| 2 | 2 | 0 | 2 | 0 | 0 | 0 | 0 | 2 | 2 | 0 | 0 | 0 | 0 | 0 |
| 0 | 0 | 0 | 0 | 0 | 0 | 0 | 0 | 3 | 3 | 0 | 0 | 0 | 0 | 0 |
| 0 | 0 | 0 | 0 | 0 | 0 | 0 | 0 | 0 | 0 | 0 | 0 | 0 | 0 | 0 |
| 0 | 0 | 0 | 0 | 0 | 0 | 0 | 0 | 0 | 0 | 0 | 0 | 0 | 0 | 0 |
| 0 | 0 | 0 | 0 | 0 | 0 | 0 | 0 | 2 | 2 | 2 | 0 | 0 | 0 | 0 |
| 0 | 0 | 0 | 0 | 0 | 0 | 0 | 0 | 0 | 0 | 0 | 0 | 0 | 0 | 0 |
| 0 | 0 | 0 | 0 | 0 | 0 | 0 | 0 | 0 | 0 | 0 | 0 | 0 | 0 | 0 |
| 2 | 0 | 0 | 0 | 0 | 0 | 0 | 0 | 0 | 2 | 3 | 0 | 0 | 0 | 0 |
| 0 | 0 | 0 | 0 | 0 | 0 | 0 | 0 | 0 | 0 | 0 | 0 | 0 | 0 | 0 |
| 0 | 0 | 0 | 0 | 0 | 0 | 0 | 0 | 2 | 0 | 2 | 0 | 0 | 0 | 0 |
| 0 | 0 | 0 | 0 | 0 | 0 | 0 | 0 | 0 | 2 | 2 | 0 | 0 | 0 | 0 |



**Table S2. Calculation of Relative Abundance of Nail Proteins in (A) Solubilized and (B) Insoluble Fractions.** Tabulated are the numbers of unique peptides for each sample, the emPAI values derived from Mascot searching, the mean and standard deviation (SD) of the emPAI values and the values normalized to a total of 100 (Norm).

| (A) Solubilized |             |         | Unique Peptides ----- |     |     |     |     | emPAI Values ----- |       |       |       |       |      |       |  |
|-----------------|-------------|---------|-----------------------|-----|-----|-----|-----|--------------------|-------|-------|-------|-------|------|-------|--|
| Protein         | Accession   | MW      | BS                    | RRS | DS  | PMS | Sum | BS                 | DS    | MS    | RS    | Mean  | SD   | Norm  |  |
| DSP             | IPI00013933 | 332 kDa | 13                    | 10  | 15  | 26  | 64  | 0.2                | 0.13  | 0.27  | 0.1   | 0.18  | 0.08 | 0.019 |  |
| KRT86           | IPI00182655 | 53 kDa  | 82                    | 77  | 82  | 86  | 327 | 281.4              | 210.7 | 375.6 | 210.7 | 269.6 | 78.1 | 29.18 |  |
| LRRC15          | IPI00152871 | 64 kDa  | 13                    | 11  | 9   | 7   | 40  | 0.48               | 0.48  | 0.28  | 0.63  | 0.47  | 0.14 | 0.05  |  |
| KRT33B          | IPI00031423 | 46 kDa  | 51                    | 59  | 50  | 64  | 224 | 142.7              | 95.08 | 480.2 | 187   | 226.3 | 173  | 24.49 |  |
| KRT84           | IPI00300052 | 65 kDa  | 28                    | 20  | 25  | 28  | 101 | 7.02               | 5.6   | 7.41  | 2.69  | 5.68  | 2.14 | 0.61  |  |
| KRT34           | IPI00917731 | 45 kDa  | 21                    | 21  | 20  | 16  | 78  | 81.99              | 53.84 | 164.5 | 57.22 | 89.4  | 51.6 | 9.67  |  |
| KRTAP13-4       | IPI00373947 | 18 kDa  | 5                     | 5   | 4   | 8   | 22  | 0.63               | 1.27  | 2.7   | 1.27  | 1.47  | 0.88 | 0.16  |  |
| KRT85           | IPI00032541 | 56 kDa  | 44                    | 38  | 38  | 45  | 165 | 94.56              | 75.5  | 89.39 | 71.37 | 82.7  | 11   | 8.95  |  |
| KRT14           | IPI00384444 | 52 kDa  | 29                    | 23  | 23  | 30  | 105 | 8.68               | 4.57  | 10.63 | 3.93  | 6.95  | 3.23 | 0.75  |  |
| KRTAP13-2       | IPI00373959 | 19 kDa  | 5                     | 4   | 10  | 7   | 26  | 1.55               | 3.75  | 1.97  | 1.55  | 2.2   | 1.05 | 0.24  |  |
| KRTAP13-1       | IPI00328109 | 21 kDa  | 5                     | 5   | 6   | 5   | 21  | 0.77               | 2.59  | 2.59  | 1.7   | 1.91  | 0.87 | 0.21  |  |
| KRT6A           | IPI00300725 | 60 kDa  | 32                    | 13  | 30  | 31  | 106 | 3.89               | 5.04  | 4.73  | 1.21  | 3.72  | 1.74 | 0.4   |  |
| KRT39           | IPI00741855 | 56 kDa  | 6                     | 9   | 8   | 7   | 30  | 0.48               | 0.32  | 0.4   | 0.56  | 0.44  | 0.1  | 0.056 |  |
| KRT5            | IPI00009867 | 62 kDa  | 11                    | 9   | 11  | 12  | 43  | 1.33               | 2.04  | 1.63  | 0.79  | 1.45  | 0.53 | 0.16  |  |
| KRTAP2-4        | IPI00013265 | 13 kDa  | 4                     | 7   | 6   | 6   | 23  | 0.49               | 0.81  | 1.2   | 1.21  | 0.93  | 0.35 | 0.1   |  |
| KRTAP11-1       | IPI00216711 | 17 kDa  | 3                     | 4   | 3   | 3   | 13  | 0.4                | 0.65  | 0.4   | 0.95  | 0.6   | 0.26 | 0.06  |  |
| KRT36           | IPI00008692 | 52 kDa  | 17                    | 14  | 16  | 24  | 71  | 9.21               | 3.18  | 11.21 | 4     | 6.9   | 3.92 | 0.75  |  |
| KRT81           | IPI00760863 | 55 kDa  | 5                     | 8   | 7   | 6   | 26  | 172.3              | 114   | 223.7 | 130   | 160   | 49.1 | 17.31 |  |
| KRT16           | IPI00217963 | 51 kDa  | 21                    | 14  | 19  | 23  | 77  | 11.5               | 8.19  | 11.5  | 4.28  | 8.87  | 3.43 | 0.96  |  |
| KRT83           | IPI00297795 | 54 kDa  | 9                     | 9   | 8   | 7   | 33  | 49.36              | 55.42 | 58.71 | 36.91 | 50.1  | 9.61 | 5.42  |  |
| KRT32           | IPI00291540 | 50 kDa  | 5                     | 4   | 5   | 9   | 23  | 0                  | 0     | 1.51  | 0     | 0.38  | 0.76 | 0.04  |  |
| KRT1            | IPI00220327 | 66 kDa  | 5                     | 3   | 8   | 10  | 26  | 0.47               | 0.62  | 0.78  | 0.21  | 0.52  | 0.24 | 0.06  |  |
| KRT17           | IPI00450768 | 48 kDa  | 12                    | 6   | 13  | 18  | 49  | 4.16               | 2.48  | 5.71  | 0.93  | 3.32  | 2.07 | 0.36  |  |
| (B) Insoluble   |             |         | Unique peptides ----- |     |     |     |     | emPAI values ----- |       |       |       |       |      |       |  |
| Protein         | Accession   | MW      | BP                    | DP  | PMP | RRP | Sum | BP                 | DP    | PMP   | RRP   | Mean  | SD   | Norm  |  |
| DSP             | IPI00013933 | 332 kDa | 91                    | 101 | 101 | 55  | 348 | 1.55               | 1.7   | 1.84  | 0.62  | 1.43  | 0.55 | 1.03  |  |
| KRT86           | IPI00182655 | 53 kDa  | 42                    | 46  | 37  | 47  | 172 | 9.6                | 24.15 | 10.9  | 13.98 | 14.66 | 6.59 | 10.6  |  |
| LRRC15          | IPI00152871 | 64 kDa  | 41                    | 33  | 33  | 29  | 136 | 6.42               | 3.55  | 3.34  | 2.39  | 3.92  | 1.74 | 2.84  |  |
| JUP             | IPI00554711 | 82 kDa  | 33                    | 30  | 27  | 22  | 112 | 2.75               | 2.6   | 2.75  | 1.44  | 2.38  | 0.63 | 1.72  |  |
| KRT33B          | IPI00031423 | 46 kDa  | 31                    | 25  | 27  | 26  | 109 | 11.82              | 8.17  | 10.21 | 7.01  | 9.3   | 2.14 | 6.72  |  |
| PKP1            | IPI00218528 | 80 kDa  | 26                    | 23  | 23  | 16  | 88  | 1.76               | 1.02  | 1.27  | 0.66  | 1.18  | 0.46 | 0.85  |  |
| SELENBP1        | IPI00012303 | 57 kDa  | 27                    | 16  | 21  | 21  | 85  | 4.27               | 1.46  | 1.95  | 1.06  | 2.18  | 1.44 | 1.58  |  |
| EPPK1           | IPI00010951 | 556 kDa | 20                    | 11  | 27  | 8   | 66  | 0.1                | 0.05  | 0.17  | 0.01  | 0.08  | 0.07 | 0.06  |  |
| KRT84           | IPI00300052 | 65 kDa  | 25                    | 19  | 14  | 5   | 63  | 2.52               | 1.9   | 1.07  | 0.34  | 1.46  | 0.95 | 1.05  |  |
| VSIG8           | IPI00376274 | 44 kDa  | 14                    | 16  | 19  | 13  | 62  | 1.02               | 1.68  | 2.09  | 1.33  | 1.53  | 0.46 | 1.11  |  |
| DSG1            | IPI00025753 | 114 kDa | 13                    | 20  | 18  | 11  | 62  | 0.36               | 0.7   | 0.52  | 0.25  | 0.46  | 0.2  | 0.33  |  |
| KRT34           | IPI00917731 | 45 kDa  | 14                    | 15  | 13  | 19  | 61  | 14.83              | 5.95  | 7.38  | 6.4   | 8.64  | 4.17 | 6.25  |  |
| KRTAP13-4       | IPI00373947 | 18 kDa  | 16                    | 14  | 12  | 11  | 53  | 5.05               | 4.13  | 3.36  | 2.7   | 3.81  | 1.01 | 2.75  |  |
| ACTB            | IPI00021439 | 42 kDa  | 10                    | 16  | 11  | 14  | 51  | 0.55               | 1.12  | 0.69  | 0.69  | 0.76  | 0.25 | 0.55  |  |

|           |             |         |    |    |    |    |    |      |      |      |      |      |      |      |
|-----------|-------------|---------|----|----|----|----|----|------|------|------|------|------|------|------|
| KRT85     | IPI00032541 | 56 kDa  | 13 | 10 | 12 | 15 | 50 | 3.02 | 5.27 | 3.74 | 4.61 | 4.16 | 0.98 | 3.01 |
| KRT14     | IPI00384444 | 52 kDa  | 15 | 14 | 10 | 7  | 46 | 1.51 | 1.51 | 0.96 | 0.44 | 1.1  | 0.51 | 0.8  |
| KRTAP13-2 | IPI00373959 | 19 kDa  | 14 | 16 | 7  | 9  | 46 | 9.34 | 9.34 | 1.97 | 2.48 | 5.78 | 4.11 | 4.18 |
| LAP3      | IPI00419237 | 56 kDa  | 15 | 9  | 9  | 13 | 46 | 2.12 | 1.05 | 1.05 | 1.05 | 1.32 | 0.54 | 0.95 |
| PRDX6     | IPI00220301 | 25 kDa  | 12 | 11 | 11 | 11 | 45 | 2.93 | 2.47 | 4.71 | 2.47 | 3.14 | 1.07 | 2.27 |
| KPRP      | IPI00514908 | 64 kDa  | 10 | 15 | 14 | 6  | 45 | 0.27 | 0.77 | 0.61 | 0.15 | 0.45 | 0.29 | 0.33 |
| SFN       | IPI00013890 | 28 kDa  | 13 | 11 | 10 | 10 | 44 | 2.86 | 2.45 | 2.86 | 1.75 | 2.48 | 0.52 | 1.79 |
| KRT31     | IPI00032513 | 47 kDa  | 9  | 10 | 11 | 12 | 42 | 9.5  | 7.09 | 7.09 | 5.65 | 7.33 | 1.6  | 5.3  |
| HSPB1     | IPI00025512 | 23 kDa  | 11 | 8  | 11 | 10 | 40 | 1.97 | 1.26 | 1.97 | 2.4  | 1.9  | 0.47 | 1.37 |
| KRTAP13-1 | IPI00328109 | 21 kDa  | 11 | 11 | 10 | 6  | 38 | 7.42 | 8.71 | 3.14 | 3.77 | 5.76 | 2.73 | 4.16 |
| EEF1A1    | IPI00396485 | 50 kDa  | 11 | 7  | 11 | 8  | 37 | 1.13 | 0.55 | 1.13 | 0.55 | 0.84 | 0.33 | 0.61 |
| PKP3      | IPI00026952 | 87 kDa  | 6  | 11 | 10 | 9  | 36 | 0.12 | 0.35 | 0.2  | 0.2  | 0.22 | 0.1  | 0.16 |
| PPL       | IPI00298057 | 205 kDa | 11 | 6  | 17 | 2  | 36 | 0.13 | 0.08 | 0.29 | 0.02 | 0.13 | 0.12 | 0.09 |
| KRT6A     | IPI00300725 | 60 kDa  | 7  | 17 | 8  | 3  | 35 | 0.45 | 0.89 | 0.45 | 0.25 | 0.51 | 0.27 | 0.37 |
| FABP4     | IPI00215746 | 15 kDa  | 12 | 6  | 10 | 6  | 34 | 0.84 | 1.26 | 5.33 | 1.79 | 2.3  | 2.05 | 1.67 |
| GAPDH     | IPI00219018 | 36 kDa  | 10 | 9  | 8  | 7  | 34 | 0.84 | 1.74 | 0.96 | 1    | 1.14 | 0.41 | 0.82 |
| HIST1H2AH | IPI00081836 | 14 kDa  | 11 | 5  | 5  | 11 | 32 | 0    | 1.94 | 2.65 | 2.65 | 1.81 | 1.25 | 1.31 |
| EEF2      | IPI00186290 | 95 kDa  | 13 | 5  | 10 | 4  | 32 | 0.54 | 0.18 | 0.22 | 0.14 | 0.27 | 0.18 | 0.2  |
| HSPA5     | IPI00003362 | 72 kDa  | 12 | 11 | 6  | 2  | 31 | 0.36 | 0.42 | 0.19 | 0.09 | 0.26 | 0.15 | 0.19 |
| ANXA2     | IPI00418169 | 40 kDa  | 8  | 8  | 8  | 7  | 31 | 0.77 | 0.37 | 0.86 | 0.66 | 0.66 | 0.21 | 0.48 |
| KRT39     | IPI00741855 | 56 kDa  | 6  | 12 | 9  | 3  | 30 | 0.4  | 0.56 | 0.32 | 0.32 | 0.4  | 0.11 | 0.29 |
| ANXA1     | IPI00218918 | 39 kDa  | 6  | 8  | 9  | 7  | 30 | 0.76 | 0.91 | 0.91 | 0.5  | 0.77 | 0.19 | 0.56 |
| KRT5      | IPI00009867 | 62 kDa  | 4  | 11 | 9  | 5  | 29 | 0.45 | 0.75 | 0.84 | 0.36 | 0.6  | 0.23 | 0.43 |
| KRTAP2-4  | IPI00013265 | 13 kDa  | 6  | 9  | 6  | 8  | 29 | 0.81 | 1.21 | 1.2  | 0.81 | 1.01 | 0.23 | 0.73 |
| DSG4      | IPI00515022 | 114 kDa | 7  | 12 | 4  | 6  | 29 | 0.15 | 0.25 | 0.09 | 0.15 | 0.16 | 0.07 | 0.12 |
| TAGLN2    | IPI00550363 | 22 kDa  | 10 | 7  | 6  | 6  | 29 | 2.73 | 3.32 | 1.79 | 1.41 | 2.31 | 0.87 | 1.67 |
| ENO1      | IPI00465248 | 47 kDa  | 9  | 6  | 7  | 6  | 28 | 0.49 | 0.4  | 0.22 | 0.31 | 0.36 | 0.12 | 0.26 |
| LGALS7    | IPI00219221 | 15 kDa  | 5  | 9  | 6  | 7  | 27 | 2.36 | 3.12 | 2.36 | 2.36 | 2.55 | 0.38 | 1.84 |
| HIST1H4D  | IPI00453473 | 11 kDa  | 6  | 6  | 8  | 7  | 27 | 1.21 | 3.89 | 2.75 | 5.37 | 3.3  | 1.76 | 2.39 |
| PKM1/M2   | IPI00910979 | 56 kDa  | 6  | 8  | 7  | 6  | 27 | 0.31 | 0.31 | 0.31 | 0.24 | 0.29 | 0.04 | 0.21 |
| PGK1      | IPI00169383 | 45 kDa  | 5  | 7  | 9  | 6  | 27 | 0.42 | 0.42 | 0.76 | 0.64 | 0.56 | 0.17 | 0.4  |
| KRTAP11-1 | IPI00216711 | 17 kDa  | 0  | 15 | 0  | 8  | 23 | 1.73 | 7.81 | 2.81 | 1.31 | 3.42 | 3    | 2.47 |
| TGM3      | IPI00300376 | 77 kDa  | 10 | 4  | 6  | 3  | 23 | 0.28 | 0.18 | 0.23 | 0.09 | 0.2  | 0.08 | 0.14 |
| SERPINB5  | IPI00783625 | 42 kDa  | 7  | 6  | 6  | 4  | 23 | 0.56 | 0.27 | 0.25 | 0.34 | 0.36 | 0.14 | 0.26 |
| DSC3      | IPI00031549 | 100 kDa | 5  | 12 | 4  | 2  | 23 | 0.15 | 0.37 | 0.11 | 0.03 | 0.16 | 0.15 | 0.12 |
| TUBA1A    | IPI00180675 | 50 kDa  | 5  | 4  | 8  | 4  | 21 | 0    | 0.24 | 0.55 | 0    | 0.2  | 0.26 | 0.14 |
| CALML3    | IPI00216984 | 17 kDa  | 5  | 4  | 6  | 5  | 20 | 1.47 | 1.47 | 1.47 | 1.47 | 1.47 | 0    | 1.06 |
| FABP5     | IPI00007797 | 15 kDa  | 4  | 6  | 5  | 5  | 20 | 1.67 | 1.67 | 1.67 | 1.2  | 1.55 | 0.24 | 1.12 |
| LDHA      | IPI00217966 | 40 kDa  | 7  | 4  | 5  | 4  | 20 | 0.82 | 0.53 | 0.53 | 0.67 | 0.64 | 0.14 | 0.46 |
| PPIA-like | IPI00887678 | 24 kDa  | 7  | 5  | 5  | 3  | 20 | 0    | 0    | 0.18 | 0    | 0.04 | 0.09 | 0.03 |
| CALML5    | IPI00021536 | 16 kDa  | 3  | 5  | 6  | 6  | 20 | 0    | 0.78 | 1.62 | 0.78 | 0.8  | 0.66 | 0.57 |
| KRT36     | IPI00008692 | 52 kDa  | 4  | 5  | 6  | 4  | 19 | 0.71 | 0.71 | 0.81 | 0.52 | 0.69 | 0.12 | 0.5  |
| CRYAB     | IPI00021369 | 20 kDa  | 6  | 6  | 4  | 3  | 19 | 1.35 | 0.67 | 1.52 | 0.19 | 0.93 | 0.62 | 0.67 |
| TUBB2A    | IPI00013475 | 50 kDa  | 5  | 2  | 7  | 5  | 19 | 0    | 0.21 | 0.55 | 0.29 | 0.26 | 0.23 | 0.19 |
| YWHAZ     | IPI00021263 | 28 kDa  | 3  | 5  | 6  | 5  | 19 | 0.75 | 1    | 1.25 | 0.4  | 0.85 | 0.36 | 0.61 |
| TPI1      | IPI00465028 | 31 kDa  | 5  | 5  | 5  | 4  | 19 | 0.79 | 0.79 | 0.73 | 0.73 | 0.76 | 0.03 | 0.55 |

|                |                      |   |   |   |   |    |      |      |      |       |       |      |       |
|----------------|----------------------|---|---|---|---|----|------|------|------|-------|-------|------|-------|
| 29 kDa protein | IPI00453476 ( 29 kDa | 5 | 3 | 5 | 5 | 18 | 0.38 | 0.13 | 0.72 | 0.38  | 0.4   | 0.24 | 0.29  |
| AHNAK          | IPI00021812 629 kDa  | 2 | 2 | 9 | 4 | 17 | 0    | 0.02 | 0.03 | 0.02  | 0.018 | 0.01 | 0.015 |
| ALDOC          | IPI00418262 48 kDa   | 2 | 6 | 4 | 5 | 17 | 0    | 0.27 | 0.27 | 0.17  | 0.18  | 0.13 | 0.13  |
| POF1B          | IPI00103242 ( 69 kDa | 5 | 3 | 6 | 3 | 17 | 0.15 | 0.15 | 0.32 | 0.1   | 0.18  | 0.1  | 0.13  |
| LGALS3         | IPI00465431 26 kDa   | 6 | 4 | 2 | 4 | 16 | 0.43 | 0.13 | 0    | 0.13  | 0.17  | 0.18 | 0.12  |
| EZR            | IPI00843975 ( 69 kDa | 4 | 3 | 4 | 4 | 15 | 0.15 | 0.1  | 0.15 | 0.1   | 0.12  | 0.03 | 0.09  |
| S100A11        | IPI00013895 12 kDa   | 4 | 2 | 5 | 4 | 15 | 1.14 | 0    | 0.29 | 0.66  | 0.52  | 0.49 | 0.38  |
| KRT81          | IPI00760863 55 kDa   | 4 | 4 | 2 | 4 | 14 | 6.95 | 21.3 | 9.43 | 10.13 | 11.95 | 6.38 | 8.64  |
| HIST1H2BB      | IPI00220403 14 kDa   | 4 | 3 | 4 | 3 | 14 | 1.96 | 0.55 | 0    | 0.55  | 0.76  | 0.84 | 0.55  |
| H3F3B;H3F3A    | IPI00219038 15 kDa   | 5 | 3 | 3 | 3 | 14 | 1.21 | 0.81 | 0    | 0.81  | 0.71  | 0.51 | 0.51  |
| HSPA2          | IPI00007702 70 kDa   | 5 | 3 | 2 | 3 | 13 | 0.26 | 0.26 | 0.2  | 0.2   | 0.23  | 0.03 | 0.17  |
| SERPINB2       | IPI00007117 47 kDa   | 4 | 2 | 4 | 3 | 13 | 0.23 | 0.15 | 0.31 | 0.23  | 0.23  | 0.07 | 0.17  |
| EEF1G          | IPI00000875 ( 56 kDa | 5 | 2 | 3 | 3 | 13 | 0.29 | 0.13 | 0.13 | 0.21  | 0.19  | 0.08 | 0.14  |
| EIF4A1         | IPI00025491 ( 46 kDa | 2 | 3 | 4 | 2 | 11 | 0.15 | 0.2  | 0.2  | 0.15  | 0.18  | 0.03 | 0.13  |
| KRT83          | IPI00297795 54 kDa   | 2 | 3 | 2 | 3 | 10 | 3.91 | 0.07 | 3.14 | 5.16  | 3.07  | 2.17 | 2.22  |
| PLCD1          | IPI00016461 ( 88 kDa | 3 | 3 | 2 | 2 | 10 | 0    | 0.08 | 0.07 | 0.12  | 0.07  | 0.05 | 0.05  |
| H2AFY          | IPI00059366 ( 39 kDa | 3 | 2 | 3 | 2 | 10 | 0.5  | 0.38 | 0.49 | 0.27  | 0.41  | 0.11 | 0.3   |
| RNH1           | IPI00550069 50 kDa   | 3 | 2 | 2 | 2 | 9  | 0.06 | 0.13 | 0.13 | 0.2   | 0.13  | 0.06 | 0.09  |
| GNB2L1         | IPI00641950 ( 38 kDa | 2 | 2 | 2 | 3 | 9  | 0.23 | 0.23 | 0.37 | 0     | 0.21  | 0.15 | 0.15  |
| RPS10          | IPI00008438 19 kDa   | 2 | 3 | 2 | 2 | 9  | 0.59 | 0.22 | 0    | 0.22  | 0.26  | 0.24 | 0.19  |
| CBR1           | IPI00295386 30 kDa   | 2 | 2 | 3 | 2 | 9  | 0.13 | 0    | 0.23 | 0     | 0.09  | 0.11 | 0.07  |
| DUSP14         | IPI00013031 22 kDa   | 2 | 2 | 2 | 2 | 8  | 0.32 | 0.15 | 0.15 | 0.32  | 0.24  | 0.14 | 0.17  |

**Table S3A. Hair samples from Mongolia (unique peptides)**

| Proteins                                         | Accession   | MW      | High arsenic, insoluble |       |       |       |
|--------------------------------------------------|-------------|---------|-------------------------|-------|-------|-------|
|                                                  |             |         | HA3P                    | HA15P | HA24P | HA25P |
| KRT86 Keratin, type II cuticular Hb6             | IPI00182655 | 53 kDa  | 60                      | 44    | 49    | 85    |
| KRT33B Keratin, type I cuticular Ha3-II          | IPI00031423 | 46 kDa  | 29                      | 24    | 31    | 55    |
| KRT85 Keratin, type II cuticular Hb5             | IPI00032541 | 56 kDa  | 23                      | 23    | 27    | 33    |
| DSP Isoform DPI of Desmoplakin                   | IPI00013933 | 332 kDa | 53                      | 68    | 75    | 43    |
| KRT31 Keratin, type I cuticular Ha1              | IPI00032513 | 47 kDa  | 16                      | 12    | 11    | 25    |
| KRT34 45 kDa protein                             | IPI00917731 | 45 kDa  | 15                      | 14    | 19    | 22    |
| KRT84 Keratin, type II cuticular Hb4             | IPI00300052 | 65 kDa  | 0                       | 0     | 10    | 0     |
| LRRC15 Leucine-rich repeat-containing protein 1  | IPI00152871 | 64 kDa  | 10                      | 11    | 13    | 4     |
| KRT81 Keratin, type II cuticular Hb1             | IPI00760863 | 55 kDa  | 4                       | 0     | 2     | 4     |
| JUP Junction plakoglobin                         | IPI00554711 | 82 kDa  | 17                      | 22    | 26    | 19    |
| PKP1 Isoform 1 of Plakophilin-1                  | IPI00218528 | 80 kDa  | 24                      | 22    | 24    | 16    |
| KRT36 Isoform 1 of Keratin, type I cuticular Ha6 | IPI00008692 | 52 kDa  | 0                       | 3     | 3     | 4     |
| KRT82 Keratin, type II cuticular Hb2             | IPI00300053 | 57 kDa  | 45                      | 51    | 48    | 29    |
| VSIG8 Isoform 1 of V-set and immunoglobulin do   | IPI00376274 | 44 kDa  | 15                      | 16    | 16    | 8     |
| KRT32 Keratin, type I cuticular Ha2              | IPI00291540 | 50 kDa  | 28                      | 23    | 23    | 16    |
| KRT83 Keratin, type II cuticular Hb3             | IPI00297795 | 54 kDa  | 7                       | 6     | 7     | 13    |
| KRTAP2-4;LOC728934;KAP2.1B;LOC644350;LOC7        | IPI00013265 | 13 kDa  | 5                       | 5     | 4     | 8     |
| FABP4 Fatty acid-binding protein, adipocyte      | IPI00215746 | 15 kDa  | 5                       | 3     | 4     | 0     |
| KRTAP13-2 Keratin-associated protein 13-2        | IPI00373959 | 19 kDa  | 0                       | 3     | 0     | 2     |
| HIST1H2BB Histone H2B type 1-B                   | IPI00220403 | 14 kDa  | 9                       | 9     | 9     | 4     |
| SELENBP1 cDNA FLJ55757, highly similar to Selen  | IPI00012303 | 57 kDa  | 18                      | 23    | 20    | 22    |
| LGALS7;LGALS7B Galectin-7                        | IPI00219221 | 15 kDa  | 5                       | 4     | 5     | 0     |
| KRT35 Keratin, type I cuticular Ha5              | IPI00790172 | 50 kDa  | 18                      | 21    | 16    | 15    |
| SFN Isoform 1 of 14-3-3 protein sigma            | IPI00013890 | 28 kDa  | 10                      | 13    | 14    | 9     |
| KRTAP11-1 Keratin-associated protein 11-1        | IPI00216711 | 17 kDa  | 14                      | 11    | 17    | 7     |
| HSPB1 Heat shock protein beta-1                  | IPI00025512 | 23 kDa  | 0                       | 0     | 0     | 0     |
| GAPDH Glyceraldehyde-3-phosphate dehydroger      | IPI00219018 | 36 kDa  | 7                       | 7     | 4     | 4     |
| ACTB Actin, cytoplasmic 1                        | IPI00021439 | 42 kDa  | 8                       | 6     | 10    | 7     |
| KRT39 Keratin, type I cytoskeletal 39            | IPI00741855 | 56 kDa  | 13                      | 14    | 14    | 9     |
| KRTAP13-1 21 kDa protein                         | IPI00328109 | 21 kDa  | 0                       | 0     | 0     | 0     |
| KRT35 46 kDa protein                             | IPI00798228 | 46 kDa  | 3                       | 0     | 3     | 7     |
| HIST1H2AH Histone H2A type 1-H                   | IPI00081836 | 14 kDa  | 7                       | 9     | 11    | 6     |
| DSG4 Isoform 1 of Desmoglein-4                   | IPI00515022 | 114 kDa | 11                      | 12    | 14    | 9     |
| PRDX6 Peroxiredoxin-6                            | IPI00220301 | 25 kDa  | 8                       | 7     | 9     | 4     |
| KRTAP3-1;LOC100132802 Keratin-associated pro     | IPI00011212 | 11 kDa  | 0                       | 0     | 0     | 3     |
| HIST1H4D;HIST1H4K;HIST1H4B;HIST1H4A;HIST1f       | IPI00453473 | 11 kDa  | 9                       | 13    | 9     | 5     |
| EEF1A1 Elongation factor 1-alpha 1               | IPI00396485 | 50 kDa  | 5                       | 8     | 7     | 5     |
| TAGLN2 Transgelin-2                              | IPI00550363 | 22 kDa  | 0                       | 5     | 3     | 2     |
| HSPA5 HSPA5 protein                              | IPI00003362 | 72 kDa  | 4                       | 6     | 7     | 3     |
| LAP3 Isoform 1 of Cytosol aminopeptidase         | IPI00419237 | 56 kDa  | 8                       | 7     | 6     | 0     |
| EEF2 Elongation factor 2                         | IPI00186290 | 95 kDa  | 2                       | 11    | 9     | 0     |
| AHNAK Neuroblast differentiation-associated prc  | IPI00021812 | 629 kDa | 0                       | 4     | 2     | 2     |
| ANXA2 annexin A2 isoform 1                       | IPI00418169 | 40 kDa  | 4                       | 4     | 6     | 3     |
| CALML3 Calmodulin-like protein 3                 | IPI00216984 | 17 kDa  | 4                       | 3     | 6     | 5     |
| PKP3 Plakophilin-3                               | IPI00026952 | 87 kDa  | 9                       | 4     | 4     | 2     |
| PPL Periplakin                                   | IPI00298057 | 205 kDa | 3                       | 3     | 6     | 0     |
| ANXA1 Annexin A1                                 | IPI00218918 | 39 kDa  | 0                       | 2     | 3     | 0     |

|                                                               |             |          |    |    |    |   |
|---------------------------------------------------------------|-------------|----------|----|----|----|---|
| CRYAB Alpha-crystallin B chain                                | IPI00021369 | 20 kDa   | 3  | 2  | 5  | 3 |
| ENO1 Isoform alpha-enolase of Alpha-enolase                   | IPI00465248 | 47 kDa   | 0  | 2  | 5  | 4 |
| FLJ54554, highly similar to Pyruvate kinase isozyme I         | IPI00910979 | 56 kDa   | 0  | 2  | 2  | 0 |
| S100A3 Protein S100-A3                                        | IPI00016752 | 12 kDa   | 6  | 7  | 6  | 0 |
| TUBA1A Tubulin alpha-1A chain                                 | IPI00180675 | 50 kDa   | 8  | 6  | 9  | 6 |
| KRT33A Keratin, type I cuticular Ha3-I                        | IPI00297632 | 46 kDa   | 0  | 0  | 2  | 2 |
| LGALS3 Galectin-3                                             | IPI00465431 | 26 kDa   | 6  | 6  | 5  | 2 |
| HSPA2 Heat shock-related 70 kDa protein 2                     | IPI00007702 | 70 kDa   | 6  | 6  | 8  | 2 |
| TUBB2A Tubulin beta-2A chain                                  | IPI00013475 | 50 kDa   | 7  | 9  | 9  | 4 |
| TGM3 Protein-glutamine gamma-glutamyltransferase 3            | IPI00300376 | 77 kDa   | 5  | 8  | 7  | 4 |
| PGK1 Phosphoglycerate kinase 1                                | IPI00169383 | 45 kDa   | 2  | 2  | 2  | 0 |
| YWHAZ 14-3-3 protein zeta/delta                               | IPI00021263 | 28 kDa   | 0  | 2  | 0  | 0 |
| TPI1 Isoform 1 of Triosephosphate isomerase                   | IPI00465028 | 31 kDa   | 3  | 4  | 5  | 5 |
| LDHA cDNA FLJ55792, highly similar to L-lactate dehydrogenase | IPI00217966 | 40 kDa   | 2  | 4  | 2  | 0 |
| KRTAP3-3;LOC100132276 Keratin-associated protein 3            | IPI00013267 | 10 kDa   | 2  | 0  | 0  | 2 |
| KRT80 Isoform 2 of Keratin, type II cytoskeletal 8            | IPI00431749 | 47 kDa   | 0  | 4  | 4  | 0 |
| LOC440926;H3F3B;H3F3A Histone H3.3                            | IPI00219038 | 15 kDa   | 3  | 0  | 0  | 2 |
| LMNA Isoform A of Lamin-A/C                                   | IPI00021405 | 74 kDa   | 3  | 2  | 8  | 3 |
| 29 kDa protein                                                | IPI00453476 | (29 kDa) | 5  | 3  | 5  | 0 |
| PLCD1 phospholipase C, delta 1 isoform 1                      | IPI00016461 | (88 kDa) | 5  | 4  | 7  | 4 |
| LOC654188 similar to peptidylprolyl isomerase A               | IPI00887678 | 24 kDa   | 3  | 3  | 0  | 0 |
| SERPINB5 Serpin B5                                            | IPI00783625 | 42 kDa   | 3  | 3  | 4  | 2 |
| KRTAP3-2;LOC100128819 Keratin-associated protein 3            | IPI00011214 | 10 kDa   | 0  | 0  | 0  | 0 |
| LOC100131696 Putative keratin-associated protein 6            | IPI00791014 | 54 kDa   | 12 | 9  | 8  | 5 |
| PLEC1 Isoform 3 of Plectin-1                                  | IPI00398002 | 518 kDa  | 6  | 10 | 6  | 0 |
| EZR Ezrin                                                     | IPI00843975 | (69 kDa) | 2  | 2  | 4  | 0 |
| CTNNB1 Isoform 1 of Catenin beta-1                            | IPI00017292 | (85 kDa) | 5  | 8  | 11 | 0 |
| KRT40 Keratin, type I cytoskeletal 40                         | IPI00552959 | 48 kDa   | 7  | 7  | 8  | 3 |
| HIST2H2AA3;HIST2H2AA4 Histone H2A type 2-A                    | IPI00216457 | (14 kDa) | 2  | 2  | 2  | 0 |
| PABPC1 Isoform 1 of Polyadenylate-binding protein 1           | IPI00008524 | (71 kDa) | 4  | 7  | 4  | 0 |
| HIST1H1E Histone H1.4                                         | IPI00217467 | 22 kDa   | 4  | 6  | 7  | 4 |
| CALML5 Calmodulin-like protein 5                              | IPI00021536 | 16 kDa   | 0  | 0  | 0  | 0 |
| HIST1H1B Histone H1.5                                         | IPI00217468 | 23 kDa   | 4  | 4  | 7  | 4 |
| S100A11 Protein S100-A11                                      | IPI00013895 | 12 kDa   | 0  | 0  | 0  | 0 |
| RPSA 33 kDa protein                                           | IPI00413108 | (33 kDa) | 2  | 4  | 2  | 2 |
| Keratin-81-like protein                                       | IPI00008669 | 53 kDa   | 0  | 0  | 0  | 0 |
| RNH1 Ribonuclease inhibitor                                   | IPI00550069 | 50 kDa   | 2  | 0  | 0  | 0 |
| DUSP14 Dual specificity protein phosphatase 14                | IPI00013031 | 22 kDa   | 2  | 2  | 2  | 0 |
| UBA52 ubiquitin and ribosomal protein L40 precursor           | IPI00456429 | 15 kDa   | 3  | 2  | 3  | 3 |
| EEF1G cDNA FLJ56389, highly similar to EEF1G                  | IPI00000875 | (56 kDa) | 2  | 2  | 3  | 0 |
| RPS3 40S ribosomal protein S3                                 | IPI00011253 | 27 kDa   | 0  | 5  | 0  | 0 |
| EIF4A1 Eukaryotic initiation factor 4A-I                      | IPI00025491 | (46 kDa) | 2  | 4  | 7  | 0 |
| TXNRD1 Isoform 5 of Thioredoxin reductase 1, cytosolic        | IPI00554786 | 55 kDa   | 4  | 8  | 5  | 0 |
| KRTAP24-1 Keratin-associated protein 24-1                     | IPI00414750 | 28 kDa   | 4  | 6  | 4  | 0 |
| HSP90AB1 Heat shock protein HSP 90-beta                       | IPI00414676 | 83 kDa   | 3  | 4  | 3  | 0 |
| ATP5B ATP synthase subunit beta, mitochondrial                | IPI00303476 | 57 kDa   | 10 | 9  | 5  | 0 |
| HIST2H3D;HIST2H3A;HIST2H3C Histone H3.2                       | IPI00171611 | 15 kDa   | 0  | 2  | 0  | 0 |
| YWHAE 14-3-3 protein epsilon                                  | IPI00000816 | 29 kDa   | 3  | 5  | 3  | 0 |
| RPLP2 60S acidic ribosomal protein P2                         | IPI00008529 | 12 kDa   | 2  | 3  | 0  | 0 |

|                                                  |             |          |   |   |   |   |
|--------------------------------------------------|-------------|----------|---|---|---|---|
| CFL1 Cofilin-1                                   | IPI00012011 | 19 kDa   | 0 | 0 | 2 | 0 |
| RPL4 60S ribosomal protein L4                    | IPI00003918 | 48 kDa   | 3 | 0 | 2 | 0 |
| RPLP0 60S acidic ribosomal protein P0            | IPI00008530 | 34 kDa   | 0 | 2 | 2 | 0 |
| KRT38 Keratin, type I cuticular Ha8              | IPI00297641 | 50 kDa   | 0 | 0 | 0 | 5 |
| HSD17B4 Peroxisomal multifunctional enzyme ty    | IPI00019912 | 80 kDa   | 3 | 4 | 4 | 2 |
| AIM1 Absent in melanoma 1 protein                | IPI00294840 | 189 kDa  | 3 | 5 | 5 | 0 |
| HSPA1A Heat shock 70 kDa protein 1               | IPI00304925 | (70 kDa  | 0 | 0 | 0 | 0 |
| HEPHL1 Hephaestin-like protein 1                 | IPI00848044 | 132 kDa  | 3 | 9 | 5 | 3 |
| MDH2 Malate dehydrogenase, mitochondrial         | IPI00291006 | 36 kDa   | 5 | 8 | 4 | 0 |
| H2AFY H2A histone family, member Y isoform 2     | IPI00059366 | (39 kDa  | 2 | 2 | 4 | 0 |
| GDI2 cDNA FLJ60299, highly similar to Rab GDP d  | IPI00031461 | 51 kDa   | 2 | 3 | 3 | 0 |
| RPS8 40S ribosomal protein S8                    | IPI00216587 | (24 kDa  | 0 | 2 | 0 | 0 |
| KRTAP9-9 Isoform 2 of Keratin-associated protei  | IPI00788020 | (18 kDa  | 0 | 0 | 0 | 0 |
| PRDX2 Peroxiredoxin-2                            | IPI00027350 | (22 kDa  | 0 | 2 | 3 | 0 |
| EFHD1 EF-hand domain-containing protein D1       | IPI00031091 | 27 kDa   | 0 | 2 | 3 | 0 |
| RPL3 60S ribosomal protein L3                    | IPI00550021 | 46 kDa   | 0 | 2 | 0 | 0 |
| Putative uncharacterized protein ENSP00000260    | IPI00871908 | 32 kDa   | 0 | 2 | 2 | 0 |
| HSPA8 Isoform 1 of Heat shock cognate 71 kDa p   | IPI00003865 | 71 kDa   | 3 | 2 | 2 | 0 |
| FASN Fatty acid synthase                         | IPI00026781 | 273 kDa  | 4 | 8 | 3 | 0 |
| ALDOA Fructose-bisphosphate aldolase A           | IPI00465439 | 39 kDa   | 0 | 0 | 0 | 0 |
| TUBA1B cDNA FLJ60097, highly similar to Tubulir  | IPI00792677 | 46 kDa   | 2 | 2 | 2 | 0 |
| NACA nascent polypeptide-associated complex a    | IPI00797126 | 95 kDa   | 2 | 2 | 2 | 0 |
| LYG2 Lysozyme g-like protein 2                   | IPI00328398 | (23 kDa  | 4 | 5 | 3 | 0 |
| FAM26D Isoform 1 of Protein FAM26D               | IPI00065530 | 35 kDa   | 4 | 5 | 4 | 2 |
| CLTC Isoform 1 of Clathrin heavy chain 1         | IPI00024067 | (192 kDa | 3 | 3 | 0 | 0 |
| GNB2L1 38 kDa protein                            | IPI00641950 | (38 kDa  | 2 | 3 | 0 | 0 |
| DYNC1H1 Cytoplasmic dynein 1 heavy chain 1       | IPI00456969 | 532 kDa  | 0 | 0 | 0 | 0 |
| ACADVL cDNA FLJ56425, highly similar to Very-lo  | IPI00028031 | (75 kDa  | 3 | 6 | 7 | 0 |
| HNRNPA1 Isoform A1-B of Heterogeneous nuclea     | IPI00215965 | (39 kDa  | 3 | 2 | 3 | 0 |
| TRIM29 Isoform Alpha of Tripartite motif-contair | IPI00073096 | (66 kDa  | 0 | 0 | 0 | 0 |
| RPL6 60S ribosomal protein L6                    | IPI00329389 | (33 kDa  | 0 | 3 | 0 | 0 |
| RPS2P5 hypothetical protein isoform 1            | IPI00165486 | (31 kDa  | 2 | 2 | 0 | 0 |
| PADI3 Protein-arginine deiminase type-3          | IPI00008486 | 75 kDa   | 3 | 9 | 3 | 0 |
| RPL14 Ribosomal protein L14 variant              | IPI00555744 | 24 kDa   | 0 | 2 | 0 | 0 |
| GARS Glycyl-tRNA synthetase                      | IPI00783097 | (83 kDa  | 0 | 2 | 0 | 0 |
| H2AFV Histone H2A.V                              | IPI00018278 | (14 kDa  | 0 | 0 | 0 | 2 |
| ME1 NADP-dependent malic enzyme                  | IPI00008215 | 64 kDa   | 0 | 2 | 0 | 0 |
| TUBA4A Tubulin alpha-4A chain                    | IPI00007750 | (50 kDa  | 0 | 2 | 3 | 2 |
| RPS9 40S ribosomal protein S9                    | IPI00221088 | 23 kDa   | 0 | 2 | 0 | 0 |
| TGM1 Protein-glutamine gamma-glutamyltransfe     | IPI00305622 | 90 kDa   | 3 | 5 | 4 | 0 |
| KRTAP10-12 Keratin-associated protein 10-12      | IPI00394683 | 25 kDa   | 0 | 4 | 7 | 0 |
| RPL15 21 kDa protein                             | IPI00927715 | 21 kDa   | 0 | 2 | 0 | 0 |
| KRTAP4-4 Keratin-associated protein 4-4          | IPI00000143 | 18 kDa   | 0 | 5 | 0 | 0 |
| EEF1D eukaryotic translation elongation factor 1 | IPI00642971 | (71 kDa  | 2 | 0 | 2 | 0 |
| Polypyrimidine tract-binding protein 1           | IPI00179964 | (57 kDa  | 2 | 2 | 2 | 0 |
| PA2G4 Proliferation-associated protein 2G4       | IPI00299000 | (44 kDa  | 0 | 3 | 0 | 0 |
| LY6G6D;LY6G6F Lymphocyte antigen 6 complex,      | IPI00168619 | (19 kDa  | 4 | 3 | 3 | 2 |
| RPL11 Isoform 1 of 60S ribosomal protein L11     | IPI00376798 | (20 kDa  | 0 | 2 | 0 | 0 |
| RPLP1 60S acidic ribosomal protein P1            | IPI00008527 | 12 kDa   | 0 | 2 | 2 | 0 |

|                                                     |             |          |   |   |   |   |
|-----------------------------------------------------|-------------|----------|---|---|---|---|
| VCP Transitional endoplasmic reticulum ATPase       | IPI00022774 | 89 kDa   | 2 | 2 | 2 | 0 |
| PDCD6IP PDCD6IP protein                             | IPI00246058 | 97 kDa   | 0 | 2 | 0 | 0 |
| MIF;LOC284889 Macrophage migration inhibitor        | IPI00293276 | 12 kDa   | 0 | 2 | 2 | 0 |
| NEU2 Sialidase-2                                    | IPI00022482 | 42 kDa   | 2 | 2 | 4 | 0 |
| RTN4 Isoform 2 of Reticulon-4                       | IPI00298289 | 40 kDa   | 0 | 0 | 0 | 2 |
| RPS15A 40S ribosomal protein S15a                   | IPI00221091 | 15 kDa   | 0 | 0 | 2 | 0 |
| GSTP1 Glutathione S-transferase P                   | IPI00219757 | 23 kDa   | 0 | 0 | 2 | 0 |
| RPS4X 40S ribosomal protein S4, X isoform           | IPI00217030 | 30 kDa   | 0 | 0 | 2 | 0 |
| RAB11A cDNA FLJ61136, highly similar to Ras-rel     | IPI00429190 | 29 kDa   | 0 | 2 | 0 | 0 |
| CRAT Isoform 1 of Carnitine O-acetyltransferase     | IPI00016457 | (71 kDa  | 0 | 6 | 4 | 0 |
| PHGDH Phosphoglycerate dehydrogenase                | IPI00642548 | 53 kDa   | 0 | 0 | 0 | 0 |
| ACTN4 Alpha-actinin-4                               | IPI00013808 | 105 kDa  | 0 | 0 | 0 | 0 |
| PCBP1 Poly(rC)-binding protein 1                    | IPI00016610 | 37 kDa   | 0 | 0 | 2 | 0 |
| HIST1H2BF;HIST1H2BC;HIST1H2BI;HIST1H2BG;HI          | IPI00020101 | (14 kDa  | 0 | 0 | 0 | 0 |
| NME1;NME2 Isoform 1 of Nucleoside diphosphat        | IPI00026260 | (17 kDa  | 2 | 3 | 2 | 0 |
| cDNA FLJ51392, highly similar to Keratin, type II c | IPI00922826 | 32 kDa   | 0 | 0 | 0 | 0 |
| CTSD Cathepsin D                                    | IPI00011229 | 45 kDa   | 0 | 0 | 2 | 0 |
| ATP5A1 ATP synthase subunit alpha, mitochondr       | IPI00440493 | 60 kDa   | 2 | 2 | 0 | 0 |
| RPS14 40S ribosomal protein S14                     | IPI00026271 | 16 kDa   | 0 | 2 | 0 | 0 |
| HSP90AA1 heat shock 90kDa protein 1, alpha iso      | IPI00382470 | (98 kDa  | 0 | 4 | 0 | 0 |
| KRTAP4-3 Keratin-associated protein 4-3             | IPI00457200 | 21 kDa   | 2 | 0 | 0 | 2 |
| RPS16 40S ribosomal protein S16                     | IPI00221092 | 16 kDa   | 2 | 0 | 0 | 0 |
| LMNB1 Lamin-B1                                      | IPI00217975 | (66 kDa  | 2 | 0 | 3 | 0 |
| cDNA FLJ56429, highly similar to Glucose-6-phos     | IPI00910781 | 64 kDa   | 0 | 0 | 2 | 0 |
| IL1F10 Isoform 1 of Interleukin-1 family member     | IPI00103482 | (17 kDa  | 2 | 2 | 2 | 0 |
| RPS18;LOC100130553 40S ribosomal protein S18        | IPI00013296 | 18 kDa   | 0 | 0 | 3 | 0 |
| HNRNPC Isoform C1 of Heterogeneous nuclear ri       | IPI00216592 | (32 kDa  | 0 | 0 | 0 | 0 |
| KRTAP10-11 Keratin-associated protein 10-11         | IPI00394674 | 30 kDa   | 0 | 2 | 5 | 0 |
| TUBB2C Tubulin beta-2C chain                        | IPI00007752 | 50 kDa   | 0 | 2 | 0 | 2 |
| CA2 Carbonic anhydrase 2                            | IPI00218414 | 29 kDa   | 0 | 0 | 0 | 0 |
| HNRNPH1 Heterogeneous nuclear ribonucleopro         | IPI00013881 | (49 kDa  | 3 | 0 | 2 | 0 |
| DST dystonin isoform 3                              | IPI00008756 | (634 kDa | 2 | 0 | 0 | 0 |
| H1FO Histone H1.0                                   | IPI00550239 | 21 kDa   | 0 | 0 | 0 | 0 |
| SFPQ Isoform Long of Splicing factor, proline- an   | IPI00010740 | 76 kDa   | 2 | 0 | 2 | 0 |
| cDNA FLJ60029, highly similar to Keratin, type II c | IPI00910810 | 29 kDa   | 2 | 0 | 0 | 0 |
| ATP6V1B2 V-type proton ATPase subunit B, brair      | IPI00007812 | 57 kDa   | 0 | 2 | 2 | 0 |
| CSNK1E Casein kinase I isoform epsilon              | IPI00027729 | 47 kDa   | 2 | 3 | 2 | 0 |
| EIF3M Eukaryotic translation initiation factor 3 s  | IPI00102069 | 43 kDa   | 0 | 2 | 0 | 0 |
| RNPEP Putative uncharacterized protein RNPEP        | IPI00647400 | 68 kDa   | 0 | 2 | 2 | 0 |
| RPS20 40S ribosomal protein S20                     | IPI00012493 | (13 kDa  | 2 | 0 | 0 | 0 |
| ACTBL2 Beta-actin-like protein 2                    | IPI00003269 | 42 kDa   | 2 | 0 | 0 | 0 |
| DYNLL1 Dynein light chain 1, cytoplasmic            | IPI00019329 | 10 kDa   | 0 | 2 | 0 | 0 |
| RAN GTP-binding nuclear protein Ran                 | IPI00643041 | (24 kDa  | 2 | 0 | 0 | 0 |
| RAB1C Putative Ras-related protein Rab-1C           | IPI00374519 | 22 kDa   | 0 | 0 | 0 | 0 |
| ATG9B Isoform 1 of Autophagy-related protein 9      | IPI00465328 | 101 kDa  | 0 | 2 | 0 | 0 |
| CTNNA1 Isoform 1 of Catenin alpha-1                 | IPI00215948 | (100 kDa | 0 | 0 | 0 | 0 |
| TXN Thioredoxin                                     | IPI00216298 | (12 kDa  | 0 | 0 | 0 | 0 |
| TARS Threonyl-tRNA synthetase, cytoplasmic          | IPI00329633 | (83 kDa  | 2 | 2 | 0 | 0 |
| cDNA FLJ51495, highly similar to ADP-ribosylatio    | IPI00909515 | 25 kDa   | 0 | 3 | 0 | 0 |

|                                                   |             |           |   |   |   |   |
|---------------------------------------------------|-------------|-----------|---|---|---|---|
| ALDH2 Aldehyde dehydrogenase, mitochondrial       | IPI00006663 | 56 kDa    | 2 | 2 | 0 | 0 |
| BAT1 Isoform 2 of Spliceosome RNA helicase BAT1   | IPI00641829 | ( 51 kDa  | 3 | 3 | 0 | 0 |
| RTN3 Isoform 2 of Reticulon-3                     | IPI00398795 | ( 111 kDa | 0 | 2 | 0 | 0 |
| G6PD Isoform Long of Glucose-6-phosphate 1-de     | IPI00216008 | ( 64 kDa  | 0 | 3 | 0 | 0 |
| Protein                                           | IPI00902893 | 27 kDa    | 0 | 0 | 2 | 0 |
| GPNMB Isoform 2 of Transmembrane glycoprote       | IPI00001592 | ( 63 kDa  | 0 | 0 | 0 | 0 |
| RPS25 40S ribosomal protein S25                   | IPI00012750 | ( 14 kDa  | 0 | 0 | 0 | 0 |
| HIP1R Huntingtin-interacting protein 1-related pr | IPI00024417 | 119 kDa   | 2 | 2 | 2 | 0 |
| KRTAP4-9 hypothetical protein                     | IPI00880032 | 24 kDa    | 0 | 0 | 0 | 0 |
| LAMP1 Lysosome-associated membrane glycopro       | IPI00884105 | 45 kDa    | 2 | 0 | 0 | 0 |
| CLIC3 Chloride intracellular channel 3            | IPI00644062 | 19 kDa    | 0 | 0 | 0 | 0 |
| VPS35 Vacuolar protein sorting-associated protei  | IPI00018931 | 92 kDa    | 0 | 0 | 0 | 0 |
| KRT83 similar to Keratin 83, partial              | IPI00888663 | 20 kDa    | 0 | 0 | 0 | 0 |
| HSD17B10 Isoform 1 of 3-hydroxyacyl-CoA dehyd     | IPI00017726 | 27 kDa    | 0 | 2 | 3 | 0 |
| HNRNPM Isoform 1 of Heterogeneous nuclear rib     | IPI00171903 | ( 78 kDa  | 0 | 0 | 0 | 0 |
| COL1A2 Collagen alpha-2(I) chain                  | IPI00304962 | 129 kDa   | 0 | 0 | 2 | 0 |
| PREP Prolyl endopeptidase                         | IPI00008164 | 81 kDa    | 0 | 2 | 0 | 0 |
| UNC84B UNC84B protein                             | IPI00878697 | 83 kDa    | 0 | 2 | 0 | 0 |
| ACIN1 Isoform 1 of Apoptotic chromatin condens    | IPI00007334 | 152 kDa   | 0 | 0 | 2 | 0 |
| SLC25A6 ADP/ATP translocase 3                     | IPI00291467 | ( 33 kDa  | 0 | 2 | 0 | 0 |
| LMNB2 Lamin-B2                                    | IPI00009771 | 70 kDa    | 0 | 0 | 0 | 0 |
| GJA1 Gap junction alpha-1 protein                 | IPI00218487 | ( 43 kDa  | 2 | 0 | 0 | 0 |
| HADHB Trifunctional enzyme subunit beta, mitoc    | IPI00022793 | 51 kDa    | 4 | 0 | 0 | 0 |
| ENGASE Isoform 1 of Cytosolic endo-beta-N-acet    | IPI00168838 | 84 kDa    | 0 | 0 | 3 | 0 |
| HSP90B1 Endoplasmic                               | IPI00027230 | 92 kDa    | 2 | 0 | 0 | 0 |
| PPIB Peptidyl-prolyl cis-trans isomerase B        | IPI00646304 | 24 kDa    | 2 | 0 | 0 | 0 |
| NPC1 Niemann-Pick C1 protein                      | IPI00005107 | ( 142 kDa | 0 | 0 | 2 | 0 |
| HSPE1 10 kDa heat shock protein, mitochondrial    | IPI00220362 | 11 kDa    | 2 | 0 | 2 | 0 |
| C1QBP Complement component 1 Q subcompon          | IPI00014230 | 31 kDa    | 0 | 0 | 0 | 0 |
| PROCR Endothelial protein C receptor precursor    | IPI00009276 | 31 kDa    | 0 | 0 | 0 | 0 |
| SLC40A1 Solute carrier family 40 member 1         | IPI00005547 | 63 kDa    | 0 | 2 | 0 | 0 |
| DBI Isoform 1 of Acyl-CoA-binding protein         | IPI00010182 | ( 10 kDa  | 0 | 4 | 0 | 0 |
| COMT Isoform Membrane-bound of Catechol O-m       | IPI00011284 | ( 30 kDa  | 0 | 3 | 0 | 0 |
| CS Citrate synthase, mitochondrial                | IPI00025366 | ( 52 kDa  | 2 | 0 | 0 | 0 |
| TKT cDNA FLJ54957, highly similar to Transketola  | IPI00643920 | 69 kDa    | 2 | 0 | 0 | 0 |
| RPS23 40S ribosomal protein S23                   | IPI00218606 | ( 16 kDa  | 0 | 2 | 0 | 0 |
| RPS28P9 similar to 40S ribosomal protein S28      | IPI00787692 | ( 10 kDa  | 0 | 0 | 0 | 0 |
| PLD3 Phospholipase D3                             | IPI00328243 | ( 55 kDa  | 0 | 2 | 0 | 0 |
| GOT2 Aspartate aminotransferase, mitochondria     | IPI00018206 | ( 47 kDa  | 0 | 0 | 0 | 0 |
| ATP5O ATP synthase subunit O, mitochondrial       | IPI00007611 | 23 kDa    | 0 | 2 | 2 | 0 |
| HEXB Beta-hexosaminidase subunit beta             | IPI00012585 | 63 kDa    | 0 | 2 | 0 | 0 |
| TYRP1 5,6-dihydroxyindole-2-carboxylic acid oxid  | IPI00015913 | 61 kDa    | 0 | 0 | 0 | 0 |
| SLC27A6 Long-chain fatty acid transport protein   | IPI00470637 | 70 kDa    | 0 | 0 | 0 | 0 |
| LEMD3 Inner nuclear membrane protein Man1         | IPI00032491 | 100 kDa   | 0 | 0 | 0 | 0 |
| C10orf140 Protein DLN-1                           | IPI00166533 | 90 kDa    | 2 | 0 | 0 | 0 |
| SETDB2 Isoform 1 of Histone-lysine N-methyltran   | IPI00045922 | ( 82 kDa  | 0 | 0 | 0 | 0 |



| High arsenic, solubilized |       |       |       | Low arsenic, insoluble |        |        |        | Low arsenic, solubilized |        |        |        |
|---------------------------|-------|-------|-------|------------------------|--------|--------|--------|--------------------------|--------|--------|--------|
| HA3S                      | HA15S | HA24S | HA25S | HC128P                 | HC129P | HC130P | HC133P | HC128S                   | HC129S | HC130S | HC133S |
| 91                        | 82    | 93    | 80    | 48                     | 64     | 44     | 47     | 92                       | 72     | 76     | 78     |
| 66                        | 61    | 64    | 64    | 29                     | 40     | 21     | 26     | 59                       | 55     | 57     | 57     |
| 35                        | 38    | 37    | 34    | 19                     | 27     | 21     | 16     | 34                       | 34     | 34     | 33     |
| 9                         | 5     | 10    | 7     | 66                     | 46     | 58     | 58     | 9                        | 3      | 12     | 2      |
| 23                        | 23    | 26    | 24    | 14                     | 16     | 10     | 11     | 26                       | 21     | 21     | 17     |
| 20                        | 25    | 25    | 15    | 15                     | 17     | 10     | 15     | 23                       | 12     | 19     | 16     |
| 0                         | 0     | 0     | 0     | 4                      | 0      | 0      | 2      | 0                        | 0      | 0      | 0      |
| 0                         | 0     | 0     | 0     | 10                     | 0      | 7      | 10     | 0                        | 0      | 0      | 0      |
| 7                         | 5     | 9     | 5     | 3                      | 3      | 2      | 2      | 7                        | 6      | 6      | 7      |
| 0                         | 0     | 3     | 0     | 25                     | 13     | 18     | 16     | 4                        | 0      | 4      | 0      |
| 0                         | 0     | 0     | 0     | 21                     | 14     | 18     | 20     | 0                        | 0      | 0      | 0      |
| 0                         | 0     | 0     | 0     | 2                      | 0      | 2      | 2      | 0                        | 0      | 0      | 0      |
| 0                         | 5     | 2     | 0     | 47                     | 16     | 45     | 47     | 3                        | 0      | 3      | 0      |
| 2                         | 7     | 5     | 3     | 14                     | 0      | 13     | 13     | 3                        | 0      | 0      | 0      |
| 0                         | 3     | 2     | 0     | 27                     | 14     | 18     | 22     | 3                        | 0      | 2      | 0      |
| 14                        | 13    | 14    | 14    | 3                      | 8      | 0      | 0      | 11                       | 12     | 12     | 12     |
| 10                        | 9     | 8     | 6     | 6                      | 7      | 4      | 6      | 11                       | 9      | 9      | 5      |
| 0                         | 2     | 2     | 3     | 0                      | 3      | 4      | 4      | 2                        | 0      | 0      | 0      |
| 6                         | 9     | 8     | 8     | 3                      | 0      | 2      | 2      | 6                        | 8      | 7      | 7      |
| 2                         | 3     | 0     | 2     | 7                      | 4      | 10     | 6      | 0                        | 0      | 2      | 0      |
| 3                         | 7     | 9     | 10    | 22                     | 8      | 11     | 13     | 4                        | 0      | 0      | 0      |
| 0                         | 0     | 0     | 0     | 5                      | 2      | 5      | 5      | 0                        | 0      | 0      | 0      |
| 19                        | 22    | 19    | 20    | 12                     | 6      | 12     | 15     | 26                       | 18     | 15     | 15     |
| 0                         | 4     | 3     | 5     | 14                     | 10     | 13     | 9      | 6                        | 0      | 4      | 0      |
| 4                         | 5     | 5     | 3     | 10                     | 5      | 7      | 11     | 3                        | 4      | 0      | 3      |
| 0                         | 0     | 0     | 0     | 3                      | 0      | 2      | 3      | 0                        | 0      | 0      | 0      |
| 0                         | 6     | 0     | 3     | 4                      | 2      | 6      | 3      | 0                        | 0      | 0      | 0      |
| 0                         | 0     | 0     | 0     | 12                     | 3      | 6      | 7      | 0                        | 0      | 0      | 0      |
| 10                        | 11    | 6     | 10    | 11                     | 6      | 7      | 10     | 14                       | 6      | 5      | 6      |
| 0                         | 3     | 3     | 3     | 0                      | 0      | 0      | 0      | 4                        | 2      | 3      | 4      |
| 6                         | 10    | 6     | 4     | 4                      | 8      | 2      | 3      | 8                        | 8      | 7      | 8      |
| 3                         | 3     | 3     | 6     | 12                     | 6      | 8      | 8      | 2                        | 0      | 2      | 0      |
| 7                         | 3     | 4     | 5     | 13                     | 10     | 8      | 10     | 5                        | 0      | 5      | 5      |
| 0                         | 0     | 0     | 0     | 6                      | 4      | 3      | 5      | 0                        | 0      | 0      | 0      |
| 8                         | 7     | 9     | 10    | 0                      | 3      | 0      | 0      | 8                        | 8      | 8      | 5      |
| 0                         | 5     | 3     | 2     | 7                      | 4      | 9      | 8      | 4                        | 0      | 4      | 3      |
| 0                         | 0     | 0     | 0     | 6                      | 4      | 4      | 5      | 0                        | 0      | 0      | 0      |
| 0                         | 0     | 0     | 0     | 3                      | 0      | 3      | 2      | 0                        | 0      | 0      | 0      |
| 0                         | 0     | 0     | 0     | 6                      | 3      | 5      | 5      | 0                        | 0      | 0      | 0      |
| 0                         | 0     | 0     | 0     | 7                      | 0      | 8      | 6      | 0                        | 0      | 0      | 0      |
| 0                         | 0     | 0     | 0     | 6                      | 0      | 8      | 9      | 0                        | 0      | 0      | 0      |
| 0                         | 0     | 0     | 0     | 0                      | 0      | 5      | 6      | 0                        | 0      | 0      | 0      |
| 0                         | 3     | 0     | 0     | 4                      | 0      | 4      | 4      | 0                        | 0      | 0      | 0      |
| 3                         | 3     | 2     | 2     | 4                      | 5      | 4      | 4      | 0                        | 0      | 0      | 2      |
| 0                         | 0     | 0     | 0     | 6                      | 7      | 7      | 5      | 0                        | 0      | 0      | 0      |
| 0                         | 0     | 0     | 0     | 2                      | 0      | 0      | 2      | 0                        | 0      | 0      | 0      |
| 0                         | 0     | 0     | 0     | 2                      | 0      | 2      | 2      | 0                        | 0      | 0      | 0      |

|   |   |   |   |    |   |   |   |   |   |   |   |
|---|---|---|---|----|---|---|---|---|---|---|---|
| 0 | 0 | 0 | 0 | 3  | 2 | 2 | 2 | 0 | 0 | 0 | 0 |
| 0 | 0 | 0 | 0 | 4  | 3 | 3 | 0 | 0 | 0 | 0 | 0 |
| 0 | 0 | 0 | 0 | 3  | 0 | 5 | 3 | 0 | 0 | 0 | 0 |
| 0 | 0 | 0 | 0 | 5  | 4 | 6 | 5 | 0 | 0 | 0 | 0 |
| 0 | 0 | 0 | 0 | 9  | 6 | 4 | 5 | 0 | 0 | 0 | 0 |
| 5 | 5 | 6 | 4 | 0  | 3 | 0 | 0 | 5 | 3 | 5 | 4 |
| 0 | 0 | 0 | 0 | 6  | 3 | 4 | 4 | 0 | 0 | 0 | 0 |
| 0 | 0 | 0 | 0 | 4  | 2 | 7 | 2 | 0 | 0 | 0 | 0 |
| 0 | 0 | 0 | 0 | 10 | 2 | 8 | 8 | 0 | 0 | 0 | 0 |
| 0 | 4 | 3 | 0 | 5  | 3 | 4 | 2 | 3 | 0 | 0 | 0 |
| 0 | 0 | 0 | 0 | 3  | 0 | 2 | 0 | 0 | 0 | 0 | 0 |
| 0 | 0 | 0 | 0 | 2  | 0 | 2 | 0 | 0 | 0 | 0 | 0 |
| 0 | 0 | 0 | 0 | 5  | 0 | 4 | 4 | 0 | 0 | 0 | 0 |
| 0 | 0 | 0 | 0 | 2  | 0 | 6 | 2 | 0 | 0 | 0 | 0 |
| 0 | 2 | 0 | 2 | 0  | 0 | 0 | 0 | 2 | 0 | 0 | 2 |
| 0 | 0 | 0 | 2 | 0  | 0 | 0 | 2 | 0 | 0 | 0 | 0 |
| 0 | 0 | 0 | 4 | 4  | 2 | 3 | 0 | 2 | 0 | 0 | 0 |
| 0 | 0 | 0 | 0 | 4  | 3 | 2 | 2 | 0 | 0 | 0 | 0 |
| 0 | 0 | 0 | 0 | 2  | 0 | 5 | 2 | 0 | 0 | 0 | 0 |
| 0 | 0 | 0 | 0 | 7  | 3 | 4 | 2 | 0 | 0 | 0 | 0 |
| 0 | 0 | 0 | 0 | 3  | 0 | 2 | 0 | 0 | 0 | 0 | 0 |
| 0 | 0 | 0 | 0 | 4  | 0 | 2 | 2 | 0 | 0 | 0 | 0 |
| 3 | 2 | 0 | 4 | 0  | 0 | 0 | 0 | 2 | 4 | 0 | 0 |
| 0 | 2 | 0 | 0 | 8  | 0 | 8 | 7 | 0 | 0 | 0 | 0 |
| 0 | 0 | 0 | 0 | 8  | 0 | 4 | 3 | 0 | 0 | 0 | 0 |
| 0 | 0 | 0 | 0 | 2  | 0 | 4 | 3 | 0 | 0 | 0 | 0 |
| 0 | 0 | 0 | 0 | 7  | 0 | 4 | 5 | 0 | 0 | 0 | 0 |
| 0 | 2 | 0 | 0 | 7  | 4 | 5 | 8 | 0 | 0 | 0 | 0 |
| 0 | 0 | 0 | 0 | 2  | 0 | 0 | 0 | 0 | 0 | 0 | 0 |
| 0 | 0 | 0 | 0 | 4  | 2 | 5 | 2 | 0 | 0 | 0 | 0 |
| 0 | 0 | 0 | 0 | 5  | 4 | 7 | 5 | 0 | 0 | 0 | 0 |
| 0 | 0 | 0 | 0 | 2  | 0 | 0 | 0 | 0 | 0 | 0 | 0 |
| 0 | 0 | 0 | 0 | 5  | 3 | 6 | 5 | 0 | 0 | 0 | 0 |
| 0 | 0 | 0 | 0 | 2  | 0 | 0 | 0 | 0 | 0 | 0 | 0 |
| 0 | 0 | 0 | 0 | 3  | 0 | 2 | 3 | 0 | 0 | 0 | 0 |
| 0 | 2 | 0 | 2 | 0  | 0 | 0 | 0 | 3 | 0 | 0 | 2 |
| 0 | 0 | 0 | 0 | 2  | 0 | 0 | 0 | 0 | 0 | 0 | 0 |
| 3 | 4 | 4 | 0 | 2  | 0 | 2 | 0 | 0 | 0 | 0 | 0 |
| 0 | 0 | 0 | 0 | 2  | 3 | 2 | 2 | 0 | 0 | 0 | 0 |
| 0 | 0 | 0 | 0 | 0  | 0 | 4 | 4 | 0 | 0 | 0 | 0 |
| 0 | 0 | 0 | 0 | 0  | 0 | 3 | 2 | 0 | 0 | 0 | 0 |
| 0 | 0 | 0 | 0 | 3  | 0 | 2 | 3 | 0 | 0 | 0 | 0 |
| 0 | 0 | 0 | 0 | 6  | 0 | 2 | 3 | 0 | 0 | 0 | 0 |
| 0 | 0 | 0 | 0 | 0  | 0 | 2 | 2 | 0 | 0 | 0 | 0 |
| 0 | 0 | 0 | 0 | 3  | 0 | 2 | 2 | 0 | 0 | 0 | 0 |
| 0 | 0 | 0 | 0 | 7  | 0 | 5 | 6 | 0 | 0 | 0 | 0 |
| 0 | 0 | 0 | 0 | 0  | 0 | 0 | 0 | 0 | 0 | 0 | 0 |
| 0 | 0 | 0 | 0 | 4  | 3 | 6 | 2 | 0 | 0 | 0 | 0 |
| 0 | 0 | 0 | 0 | 2  | 0 | 0 | 2 | 0 | 0 | 0 | 0 |





|   |   |   |   |   |   |   |   |   |   |   |   |
|---|---|---|---|---|---|---|---|---|---|---|---|
| 0 | 0 | 0 | 0 | 2 | 2 | 0 | 2 | 0 | 0 | 0 | 0 |
| 0 | 0 | 0 | 0 | 0 | 0 | 0 | 0 | 0 | 0 | 0 | 0 |
| 0 | 0 | 0 | 0 | 0 | 0 | 0 | 0 | 0 | 0 | 0 | 0 |
| 0 | 0 | 0 | 0 | 0 | 0 | 0 | 0 | 0 | 0 | 0 | 0 |
| 0 | 0 | 0 | 0 | 0 | 0 | 2 | 0 | 0 | 0 | 0 | 0 |
| 0 | 0 | 0 | 0 | 0 | 2 | 0 | 0 | 0 | 0 | 0 | 0 |
| 0 | 0 | 0 | 0 | 0 | 0 | 0 | 0 | 0 | 0 | 0 | 0 |
| 0 | 0 | 0 | 0 | 0 | 0 | 0 | 2 | 0 | 0 | 0 | 0 |
| 0 | 0 | 0 | 0 | 0 | 0 | 0 | 0 | 0 | 0 | 0 | 0 |
| 0 | 0 | 0 | 0 | 0 | 3 | 0 | 0 | 0 | 0 | 0 | 0 |
| 0 | 0 | 0 | 0 | 0 | 0 | 0 | 2 | 0 | 0 | 0 | 0 |
| 0 | 0 | 0 | 0 | 2 | 0 | 0 | 0 | 0 | 0 | 0 | 0 |
| 0 | 0 | 0 | 2 | 0 | 0 | 0 | 0 | 0 | 0 | 0 | 0 |
| 0 | 0 | 0 | 0 | 2 | 0 | 0 | 0 | 0 | 0 | 0 | 0 |
| 0 | 0 | 0 | 0 | 0 | 0 | 0 | 2 | 0 | 0 | 0 | 0 |
| 0 | 0 | 0 | 0 | 0 | 0 | 0 | 0 | 0 | 0 | 0 | 0 |
| 0 | 0 | 0 | 0 | 0 | 0 | 0 | 0 | 0 | 0 | 0 | 0 |
| 0 | 0 | 0 | 0 | 0 | 0 | 0 | 0 | 0 | 0 | 0 | 0 |
| 0 | 0 | 0 | 0 | 0 | 0 | 0 | 0 | 0 | 0 | 0 | 0 |
| 0 | 0 | 0 | 0 | 0 | 0 | 0 | 0 | 0 | 0 | 0 | 0 |
| 0 | 0 | 0 | 0 | 0 | 0 | 0 | 0 | 0 | 0 | 0 | 0 |
| 0 | 0 | 0 | 0 | 0 | 0 | 0 | 0 | 0 | 0 | 0 | 0 |
| 0 | 0 | 0 | 0 | 0 | 0 | 0 | 2 | 0 | 0 | 0 | 0 |
| 0 | 0 | 0 | 0 | 0 | 0 | 0 | 0 | 0 | 0 | 0 | 0 |
| 0 | 0 | 0 | 0 | 0 | 0 | 0 | 0 | 0 | 0 | 0 | 0 |
| 0 | 0 | 0 | 0 | 0 | 0 | 0 | 0 | 0 | 0 | 0 | 0 |
| 0 | 0 | 0 | 0 | 0 | 0 | 0 | 0 | 0 | 0 | 0 | 0 |
| 0 | 0 | 0 | 0 | 0 | 0 | 0 | 0 | 0 | 0 | 0 | 0 |
| 0 | 0 | 0 | 0 | 0 | 0 | 0 | 0 | 0 | 0 | 0 | 0 |
| 0 | 0 | 0 | 0 | 0 | 0 | 0 | 0 | 0 | 0 | 0 | 0 |
| 0 | 0 | 0 | 0 | 0 | 0 | 0 | 0 | 0 | 0 | 0 | 0 |
| 0 | 0 | 0 | 0 | 0 | 0 | 0 | 0 | 0 | 0 | 0 | 0 |
| 0 | 0 | 0 | 0 | 0 | 0 | 0 | 0 | 0 | 0 | 0 | 0 |
| 0 | 0 | 0 | 0 | 0 | 0 | 0 | 0 | 0 | 0 | 0 | 0 |
| 0 | 0 | 0 | 0 | 0 | 0 | 0 | 0 | 0 | 0 | 0 | 0 |
| 0 | 0 | 0 | 0 | 0 | 0 | 0 | 0 | 0 | 0 | 0 | 0 |
| 0 | 0 | 0 | 0 | 0 | 0 | 0 | 2 | 0 | 0 | 0 | 0 |
| 0 | 0 | 0 | 0 | 0 | 0 | 0 | 0 | 0 | 0 | 0 | 0 |
| 0 | 0 | 0 | 0 | 0 | 0 | 0 | 2 | 0 | 0 | 0 | 0 |
| 0 | 0 | 0 | 0 | 0 | 0 | 0 | 0 | 0 | 0 | 0 | 0 |
| 0 | 0 | 0 | 0 | 0 | 0 | 0 | 0 | 0 | 0 | 0 | 0 |
| 0 | 0 | 0 | 0 | 0 | 0 | 0 | 0 | 0 | 0 | 0 | 0 |
| 0 | 0 | 0 | 0 | 0 | 0 | 0 | 2 | 0 | 0 | 0 | 0 |
| 0 | 0 | 0 | 0 | 2 | 0 | 0 | 0 | 0 | 0 | 0 | 0 |
| 0 | 0 | 0 | 0 | 0 | 2 | 0 | 0 | 0 | 0 | 0 | 0 |
| 0 | 0 | 0 | 0 | 0 | 0 | 0 | 0 | 0 | 0 | 0 | 0 |
| 0 | 0 | 0 | 0 | 0 | 0 | 0 | 2 | 0 | 0 | 0 | 0 |

**Table S3B. Nail samples from Mongolia (unique peptides)**

| Proteins                                             | Accession   | MW      | High arsenic, insoluble |       |       |       |
|------------------------------------------------------|-------------|---------|-------------------------|-------|-------|-------|
|                                                      |             |         | Na24p                   | Na28p | Na29p | Na30p |
| DSP Isoform DPI of Desmoplakin                       | IPI00013933 | 332 kDa | 41                      | 78    | 143   | 129   |
| KRT86 Keratin, type II cuticular Hb6                 | IPI00182655 | 53 kDa  | 47                      | 50    | 50    | 53    |
| KRT33B Keratin, type I cuticular Ha3-II              | IPI00031423 | 46 kDa  | 39                      | 29    | 31    | 31    |
| EPPK1 epiplakin 1                                    | IPI00010951 | 556 kDa | 6                       | 9     | 44    | 32    |
| JUP Junction plakoglobin                             | IPI00554711 | 82 kDa  | 9                       | 24    | 39    | 28    |
| LRRC15 Leucine-rich repeat-containing protein 15     | IPI00152871 | 64 kDa  | 8                       | 21    | 26    | 28    |
| PKP1 Isoform 1 of Plakophilin-1                      | IPI00218528 | 80 kDa  | 8                       | 18    | 23    | 24    |
| SELENBP1 cDNA FLJ55757, highly similar to Selenium   | IPI00012303 | 57 kDa  | 0                       | 7     | 22    | 14    |
| KRT84 Keratin, type II cuticular Hb4                 | IPI00300052 | 65 kDa  | 11                      | 19    | 34    | 25    |
| KRT85 Keratin, type II cuticular Hb5                 | IPI00032541 | 56 kDa  | 21                      | 17    | 21    | 17    |
| KRT14 Keratin, type I cytoskeletal 14                | IPI00384444 | 52 kDa  | 10                      | 15    | 24    | 19    |
| DSG1 Desmoglein-1                                    | IPI00025753 | 114 kDa | 3                       | 5     | 19    | 16    |
| KRT6A Keratin, type II cytoskeletal 6A               | IPI00300725 | 60 kDa  | 5                       | 10    | 19    | 24    |
| SFN Isoform 1 of 14-3-3 protein sigma                | IPI00013890 | 28 kDa  | 3                       | 9     | 18    | 12    |
| KRT34 45 kDa protein                                 | IPI00917731 | 45 kDa  | 14                      | 13    | 16    | 18    |
| ACTB Actin, cytoplasmic 1                            | IPI00021439 | 42 kDa  | 2                       | 9     | 15    | 14    |
| KPRP Keratinocyte proline-rich protein               | IPI00514908 | 64 kDa  | 5                       | 7     | 19    | 22    |
| KRTAP13-2 Keratin-associated protein 13-2            | IPI00373959 | 19 kDa  | 7                       | 11    | 15    | 12    |
| KRT5 Keratin, type II cytoskeletal 5                 | IPI00009867 | 62 kDa  | 8                       | 12    | 18    | 14    |
| HSPB1 Heat shock protein beta-1                      | IPI00025512 | 23 kDa  | 4                       | 10    | 12    | 13    |
| KRTAP13-4 Keratin-associated protein 13-4            | IPI00373947 | 18 kDa  | 7                       | 10    | 14    | 10    |
| FLJ54554, highly similar to Pyruvate kinase isozymes | IPI00910979 | 56 kDa  | 0                       | 6     | 9     | 14    |
| KRT31 Keratin, type I cuticular Ha1                  | IPI00032513 | 47 kDa  | 16                      | 16    | 13    | 13    |
| EEF2 Elongation factor 2                             | IPI00186290 | 95 kDa  | 0                       | 3     | 14    | 10    |
| PPL Perioplakin                                      | IPI00298057 | 205 kDa | 0                       | 8     | 22    | 12    |
| VSIG8 Isoform 1 of V-set and immunoglobulin domain   | IPI00376274 | 44 kDa  | 2                       | 10    | 10    | 11    |
| GAPDH Glyceraldehyde-3-phosphate dehydrogenase       | IPI00219018 | 36 kDa  | 0                       | 7     | 14    | 13    |
| DSG4 Isoform 1 of Desmoglein-4                       | IPI00515022 | 114 kDa | 0                       | 8     | 6     | 8     |
| PKP3 Plakophilin-3                                   | IPI00026952 | 87 kDa  | 3                       | 4     | 12    | 9     |
| PRDX6 Peroxiredoxin-6                                | IPI00220301 | 25 kDa  | 0                       | 5     | 12    | 11    |
| HSPA5 HSPA5 protein                                  | IPI00003362 | 72 kDa  | 0                       | 4     | 21    | 15    |
| LAP3 Isoform 1 of Cytosol aminopeptidase             | IPI00419237 | 56 kDa  | 0                       | 0     | 11    | 17    |
| EEF1A1 Elongation factor 1-alpha 1                   | IPI00396485 | 50 kDa  | 3                       | 5     | 12    | 12    |
| KRT39 Keratin, type I cytoskeletal 39                | IPI00741855 | 56 kDa  | 2                       | 5     | 10    | 9     |
| FABP4 Fatty acid-binding protein, adipocyte          | IPI00215746 | 15 kDa  | 3                       | 10    | 10    | 10    |
| ENO1 Isoform alpha-enolase of Alpha-enolase          | IPI00465248 | 47 kDa  | 0                       | 5     | 9     | 10    |
| SERPINB2 Plasminogen activator inhibitor 2           | IPI00007117 | 47 kDa  | 0                       | 7     | 11    | 13    |
| KRT17 Keratin, type I cytoskeletal 17                | IPI00450768 | 48 kDa  | 2                       | 7     | 11    | 11    |
| KRTAP11-1 Keratin-associated protein 11-1            | IPI00216711 | 17 kDa  | 14                      | 11    | 5     | 7     |
| TAGLN2 Transgelin-2                                  | IPI00550363 | 22 kDa  | 2                       | 5     | 10    | 11    |
| ANXA2 annexin A2 isoform 1                           | IPI00418169 | 40 kDa  | 3                       | 7     | 8     | 13    |
| KRTAP2-4;LOC728934;KAP2.1B;LOC644350;LOC7307         | IPI00013265 | 13 kDa  | 8                       | 11    | 7     | 7     |

|                                                                         |             |         |   |   |    |    |
|-------------------------------------------------------------------------|-------------|---------|---|---|----|----|
| LGALS7;LGALS7B Galectin-7                                               | IPI00219221 | 15 kDa  | 5 | 6 | 9  | 10 |
| ANXA1 Annexin A1                                                        | IPI00218918 | 39 kDa  | 2 | 5 | 13 | 8  |
| CKB Creatine kinase B-type                                              | IPI00022977 | 43 kDa  | 0 | 2 | 7  | 8  |
| KRT36 Isoform 1 of Keratin, type I cuticular Ha6                        | IPI00008692 | 52 kDa  | 6 | 8 | 14 | 9  |
| LMNA Isoform A of Lamin-A/C                                             | IPI00021405 | 74 kDa  | 2 | 7 | 7  | 2  |
| KRTAP13-1 21 kDa protein                                                | IPI00328109 | 21 kDa  | 3 | 6 | 9  | 6  |
| CRYAB Alpha-crystallin B chain                                          | IPI00021369 | 20 kDa  | 0 | 4 | 7  | 7  |
| PGK1 Phosphoglycerate kinase 1                                          | IPI00169383 | 45 kDa  | 0 | 2 | 8  | 9  |
| DSC3 Isoform 3A of Desmocollin-3                                        | IPI00031549 | 100 kDa | 0 | 0 | 6  | 5  |
| KRT16 Keratin, type I cytoskeletal 16                                   | IPI00217963 | 51 kDa  | 4 | 2 | 6  | 11 |
| RNH1 Ribonuclease inhibitor                                             | IPI00550069 | 50 kDa  | 0 | 0 | 7  | 4  |
| AHNAK Neuroblast differentiation-associated protein                     | IPI00021812 | 629 kDa | 0 | 6 | 12 | 4  |
| HSPA2 Heat shock-related 70 kDa protein 2                               | IPI00007702 | 70 kDa  | 0 | 5 | 10 | 10 |
| KRT80 Isoform 2 of Keratin, type II cytoskeletal 80                     | IPI00431749 | 47 kDa  | 2 | 4 | 9  | 4  |
| IVL cDNA FLJ61407, highly similar to Involucrin                         | IPI00011692 | 70 kDa  | 0 | 6 | 5  | 7  |
| PLEC1 Isoform 3 of Plectin-1                                            | IPI00398002 | 518 kDa | 0 | 0 | 4  | 5  |
| HIST1H4D;HIST1H4K;HIST1H4B;HIST1H4A;HIST1H4L;IPI00453473                | IPI00453473 | 11 kDa  | 0 | 6 | 9  | 6  |
| LDHA cDNA FLJ55792, highly similar to L-lactate dehydrogenase           | IPI00217966 | 40 kDa  | 3 | 4 | 6  | 7  |
| ALDOC cDNA FLJ56450, highly similar to Fructose-bisphosphate aldolase C | IPI00418262 | 48 kDa  | 0 | 4 | 7  | 5  |
| 29 kDa protein                                                          | IPI00453476 | 29 kDa  | 0 | 0 | 3  | 5  |
| TGM3 Protein-glutamine gamma-glutamyltransferase 3                      | IPI00300376 | 77 kDa  | 2 | 3 | 8  | 5  |
| HIST1H2AH Histone H2A type 1-H                                          | IPI00081836 | 14 kDa  | 0 | 3 | 6  | 6  |
| TUBA1A Tubulin alpha-1A chain                                           | IPI00180675 | 50 kDa  | 0 | 0 | 8  | 8  |
| YWHAZ 14-3-3 protein zeta/delta                                         | IPI00021263 | 28 kDa  | 3 | 5 | 10 | 5  |
| TPI1 Isoform 1 of Triosephosphate isomerase                             | IPI00465028 | 31 kDa  | 0 | 3 | 8  | 9  |
| POF1B Isoform 1 of Protein POF1B                                        | IPI00103242 | 69 kDa  | 0 | 0 | 10 | 3  |
| SERPINB5 Serpin B5                                                      | IPI00783625 | 42 kDa  | 0 | 2 | 5  | 4  |
| EZR Ezrin                                                               | IPI00843975 | 69 kDa  | 0 | 2 | 7  | 5  |
| PABPC1 Isoform 1 of Polyadenylate-binding protein 1                     | IPI00008524 | 71 kDa  | 0 | 0 | 4  | 0  |
| CALML5 Calmodulin-like protein 5                                        | IPI00021536 | 16 kDa  | 0 | 0 | 6  | 5  |
| EEF1G cDNA FLJ56389, highly similar to Elongation factor 1 gamma        | IPI00000875 | 56 kDa  | 0 | 0 | 2  | 5  |
| EVPL Envoplakin                                                         | IPI00023711 | 232 kDa | 0 | 0 | 12 | 4  |
| HIST1H2BB Histone H2B type 1-B                                          | IPI00220403 | 14 kDa  | 3 | 4 | 5  | 4  |
| TUBB2A Tubulin beta-2A chain                                            | IPI00013475 | 50 kDa  | 0 | 0 | 6  | 3  |
| PLCD1 phospholipase C, delta 1 isoform 1                                | IPI00016461 | 88 kDa  | 0 | 2 | 6  | 3  |
| CALML3 Calmodulin-like protein 3                                        | IPI00216984 | 17 kDa  | 3 | 4 | 4  | 6  |
| FABP5;FABP5L7 Fatty acid-binding protein, epidermal                     | IPI00007797 | 15 kDa  | 0 | 3 | 7  | 6  |
| LGALS3 Galectin-3                                                       | IPI00465431 | 26 kDa  | 0 | 3 | 4  | 4  |
| LOC654188 similar to peptidylprolyl isomerase A-like 1                  | IPI00887678 | 24 kDa  | 0 | 0 | 6  | 4  |
| RPSA 33 kDa protein                                                     | IPI00413108 | 33 kDa  | 0 | 0 | 3  | 7  |
| RPLP0 60S acidic ribosomal protein P0                                   | IPI00008530 | 34 kDa  | 0 | 0 | 5  | 2  |
| S100A11 Protein S100-A11                                                | IPI00013895 | 12 kDa  | 0 | 0 | 4  | 4  |
| DSC1 Isoform 1A of Desmocollin-1                                        | IPI00216099 | 100 kDa | 0 | 3 | 4  | 0  |
| HSPA1A Heat shock 70 kDa protein 1                                      | IPI00304925 | 70 kDa  | 0 | 3 | 6  | 2  |

|                                                        |             |         |   |   |   |   |
|--------------------------------------------------------|-------------|---------|---|---|---|---|
| EIF4A1 Eukaryotic initiation factor 4A-I               | IPI00025491 | 46 kDa  | 0 | 3 | 4 | 2 |
| SERPINB13 Isoform 2 of Serpin B13                      | IPI00220494 | 38 kDa  | 0 | 0 | 8 | 2 |
| RPLP2 60S acidic ribosomal protein P2                  | IPI00008529 | 12 kDa  | 0 | 0 | 3 | 0 |
| CFL1 Cofilin-1                                         | IPI00012011 | 19 kDa  | 0 | 0 | 4 | 3 |
| EFHD1 EF-hand domain-containing protein D1             | IPI00031091 | 27 kDa  | 0 | 0 | 0 | 0 |
| S100A3 Protein S100-A3                                 | IPI00016752 | 12 kDa  | 0 | 4 | 0 | 4 |
| RPS3 40S ribosomal protein S3                          | IPI00011253 | 27 kDa  | 2 | 3 | 2 | 4 |
| KRT81 Keratin, type II cuticular Hb1                   | IPI00760863 | 55 kDa  | 6 | 4 | 3 | 3 |
| HSP90AB1 Heat shock protein HSP 90-beta                | IPI00414676 | 83 kDa  | 0 | 5 | 6 | 4 |
| RPS8 40S ribosomal protein S8                          | IPI00216587 | 24 kDa  | 0 | 0 | 2 | 3 |
| ALDOA Fructose-bisphosphate aldolase A                 | IPI00465439 | 39 kDa  | 0 | 3 | 3 | 4 |
| KRTAP3-1;LOC100132802 Keratin-associated protein       | IPI00011212 | 11 kDa  | 4 | 2 | 0 | 2 |
| FLNA Isoform 2 of Filamin-A                            | IPI00302592 | 280 kDa | 0 | 0 | 2 | 4 |
| FLG Filaggrin                                          | IPI00026256 | 435 kDa | 0 | 0 | 0 | 8 |
| DSC2 cDNA FLJ55716, highly similar to Desmocollin-1    | IPI00025846 | 101 kDa | 0 | 0 | 0 | 2 |
| RPL3 60S ribosomal protein L3                          | IPI00550021 | 46 kDa  | 0 | 0 | 5 | 0 |
| RPL4 60S ribosomal protein L4                          | IPI00003918 | 48 kDa  | 0 | 0 | 3 | 2 |
| GNB2L1 38 kDa protein                                  | IPI00641950 | 38 kDa  | 0 | 0 | 0 | 0 |
| KRT32 Keratin, type I cuticular Ha2                    | IPI00291540 | 50 kDa  | 0 | 2 | 0 | 2 |
| RPL6 60S ribosomal protein L6                          | IPI00329389 | 33 kDa  | 0 | 0 | 3 | 3 |
| RPS9 40S ribosomal protein S9                          | IPI00221088 | 23 kDa  | 0 | 0 | 3 | 2 |
| RPS7 40S ribosomal protein S7                          | IPI00013415 | 22 kDa  | 0 | 0 | 0 | 2 |
| GSTP1 Glutathione S-transferase P                      | IPI00219757 | 23 kDa  | 0 | 0 | 0 | 0 |
| KRTAP3-3;LOC100132276 Keratin-associated protein       | IPI00013267 | 10 kDa  | 3 | 2 | 2 | 0 |
| HIST2H2AA3;HIST2H2AA4 Histone H2A type 2-A             | IPI00216457 | 14 kDa  | 0 | 0 | 2 | 0 |
| HIST1H1B Histone H1.5                                  | IPI00217468 | 23 kDa  | 0 | 0 | 3 | 2 |
| NACA nascent polypeptide-associated complex alpha      | IPI00797126 | 95 kDa  | 0 | 0 | 2 | 0 |
| GARS Glycyl-tRNA synthetase                            | IPI00783097 | 83 kDa  | 0 | 0 | 3 | 3 |
| PDCD6IP PDCD6IP protein                                | IPI00246058 | 97 kDa  | 0 | 0 | 6 | 0 |
| RPS4X 40S ribosomal protein S4, X isoform              | IPI00217030 | 30 kDa  | 0 | 0 | 0 | 0 |
| HIST1H1E Histone H1.4                                  | IPI00217467 | 22 kDa  | 0 | 0 | 4 | 0 |
| PRDX2 Peroxiredoxin-2                                  | IPI00027350 | 22 kDa  | 0 | 0 | 0 | 2 |
| FASN Fatty acid synthase                               | IPI00026781 | 273 kDa | 0 | 0 | 0 | 0 |
| S100A16 Protein S100-A16                               | IPI00062120 | 12 kDa  | 0 | 0 | 3 | 0 |
| MYH9 Isoform 1 of Myosin-9                             | IPI00019502 | 227 kDa | 0 | 2 | 0 | 4 |
| EEF1D eukaryotic translation elongation factor 1 delta | IPI00642971 | 71 kDa  | 0 | 0 | 2 | 0 |
| PEBP1 Phosphatidylethanolamine-binding protein 1       | IPI00219446 | 21 kDa  | 0 | 2 | 4 | 2 |
| EEF1B2 Elongation factor 1-beta                        | IPI00178440 | 25 kDa  | 0 | 0 | 2 | 0 |
| RPS15 40S ribosomal protein S15                        | IPI00479058 | 17 kDa  | 0 | 0 | 2 | 6 |
| YOD1 Isoform 1 of Ubiquitin thioesterase OTU1          | IPI00183503 | 38 kDa  | 0 | 0 | 3 | 0 |
| KRT83 Keratin, type II cuticular Hb3                   | IPI00297795 | 54 kDa  | 4 | 4 | 0 | 0 |
| KRT35 Keratin, type I cuticular Ha5                    | IPI00790172 | 50 kDa  | 0 | 2 | 0 | 0 |
| LOC440926;H3F3B;H3F3A Histone H3.3                     | IPI00219038 | 15 kDa  | 0 | 0 | 0 | 0 |
| HSPA8 Isoform 1 of Heat shock cognate 71 kDa protein   | IPI00003865 | 71 kDa  | 0 | 0 | 5 | 3 |



|                                                                        |             |         |   |   |   |   |
|------------------------------------------------------------------------|-------------|---------|---|---|---|---|
| TUBA1B cDNA FLJ60097, highly similar to Tubulin alpha                  | IPI00792677 | 46 kDa  | 0 | 0 | 2 | 2 |
| HNRNPA1 Isoform A1-B of Heterogeneous nuclear ribonucleoprotein A1     | IPI00215965 | 39 kDa  | 0 | 0 | 0 | 0 |
| RPL14 Ribosomal protein L14 variant                                    | IPI00555744 | 24 kDa  | 0 | 0 | 3 | 0 |
| SPRR2G Small proline-rich protein 2G                                   | IPI00000849 | 8 kDa   | 0 | 2 | 2 | 2 |
| RPLP1 60S acidic ribosomal protein P1                                  | IPI00008527 | 12 kDa  | 0 | 0 | 2 | 2 |
| PKM2 Isoform M1 of Pyruvate kinase isozymes M1/II                      | IPI00220644 | 58 kDa  | 0 | 0 | 2 | 0 |
| ACTN4 Alpha-actinin-4                                                  | IPI00013808 | 105 kDa | 0 | 0 | 3 | 2 |
| TPM4 Isoform 2 of Tropomyosin alpha-4 chain                            | IPI00216975 | 33 kDa  | 0 | 0 | 0 | 0 |
| TPPP3 Tubulin polymerization-promoting protein family 3 member 3       | IPI00306413 | 19 kDa  | 0 | 0 | 4 | 2 |
| LOC728946;KRTAP1-1 Keratin-associated protein 1-1                      | IPI00008915 | 18 kDa  | 0 | 0 | 0 | 0 |
| ALB Isoform 1 of Serum albumin                                         | IPI00745872 | 69 kDa  | 0 | 0 | 0 | 0 |
| UBA52 ubiquitin and ribosomal protein L40 precursor                    | IPI00456429 | 15 kDa  | 0 | 0 | 0 | 3 |
| YWHAE 14-3-3 protein epsilon                                           | IPI00000816 | 29 kDa  | 0 | 2 | 2 | 2 |
| AIM1 Absent in melanoma 1 protein                                      | IPI00294840 | 189 kDa | 0 | 3 | 4 | 3 |
| SPRR1A Cornifin-A                                                      | IPI00017987 | 10 kDa  | 0 | 3 | 0 | 0 |
| RPS2P5 hypothetical protein isoform 1                                  | IPI00165486 | 31 kDa  | 0 | 0 | 2 | 3 |
| EIF4G1 Isoform B of Eukaryotic translation initiation factor 4G        | IPI00479262 | 176 kDa | 0 | 0 | 0 | 2 |
| RPS16 40S ribosomal protein S16                                        | IPI00221092 | 16 kDa  | 0 | 0 | 0 | 0 |
| KRT1 Keratin, type II cytoskeletal 1                                   | IPI00220327 | 66 kDa  | 0 | 0 | 0 | 0 |
| HSD17B4 Peroxisomal multifunctional enzyme type 4                      | IPI00019912 | 80 kDa  | 0 | 0 | 0 | 0 |
| GDI2 cDNA FLJ60299, highly similar to Rab GDP dissociation inhibitor 2 | IPI00031461 | 51 kDa  | 0 | 0 | 0 | 0 |
| Putative uncharacterized protein ENSP00000260536                       | IPI00871908 | 32 kDa  | 0 | 0 | 2 | 2 |
| DYNC1H1 Cytoplasmic dynein 1 heavy chain 1                             | IPI00456969 | 532 kDa | 0 | 0 | 0 | 3 |
| CSTB Cystatin-B                                                        | IPI00021828 | 11 kDa  | 0 | 0 | 2 | 0 |
| PERP p53 apoptosis effector related to PMP-22                          | IPI00293189 | 21 kDa  | 0 | 2 | 0 | 0 |
| RPL7A 60S ribosomal protein L7a                                        | IPI00299573 | 30 kDa  | 0 | 2 | 0 | 0 |
| Polypyrimidine tract-binding protein 1                                 | IPI00179964 | 57 kDa  | 0 | 0 | 2 | 0 |
| VCP Transitional endoplasmic reticulum ATPase                          | IPI00022774 | 89 kDa  | 0 | 0 | 0 | 0 |
| LDHB L-lactate dehydrogenase B chain                                   | IPI00219217 | 37 kDa  | 0 | 0 | 0 | 0 |
| PCBP1 Poly(rC)-binding protein 1                                       | IPI00016610 | 37 kDa  | 0 | 0 | 0 | 0 |
| RPS24 Isoform 1 of 40S ribosomal protein S24                           | IPI00029750 | 15 kDa  | 0 | 0 | 0 | 2 |
| RPS14 40S ribosomal protein S14                                        | IPI00026271 | 16 kDa  | 0 | 0 | 0 | 2 |
| VCL Isoform 1 of Vinculin                                              | IPI00291175 | 117 kDa | 0 | 0 | 0 | 0 |
| CALM2;CALM3;CALM1 Calmodulin                                           | IPI00075248 | 17 kDa  | 0 | 0 | 3 | 0 |
| MYL12B Myosin regulatory light chain MRLC2                             | IPI00033494 | 20 kDa  | 0 | 0 | 0 | 0 |
| KRT4 cDNA FLJ55805, highly similar to Keratin, type II cytoskeletal 4  | IPI00797452 | 52 kDa  | 0 | 0 | 2 | 0 |
| KRT9 Keratin, type I cytoskeletal 9                                    | IPI00019359 | 62 kDa  | 0 | 0 | 0 | 0 |
| KRTAP3-2;LOC100128819 Keratin-associated protein 3-2                   | IPI00011214 | 10 kDa  | 5 | 2 | 0 | 0 |
| KRT6C Keratin, type II cytoskeletal 6C                                 | IPI00299145 | 60 kDa  | 0 | 0 | 0 | 0 |
| KRT10 Keratin, type I cytoskeletal 10                                  | IPI00009865 | 60 kDa  | 0 | 0 | 0 | 0 |
| Keratin-81-like protein                                                | IPI00008669 | 53 kDa  | 0 | 0 | 0 | 0 |
| 48 kDa protein                                                         | IPI00798387 | 48 kDa  | 0 | 0 | 0 | 0 |
| CBR1 Carbonyl reductase [NADPH] 1                                      | IPI00295386 | 30 kDa  | 0 | 0 | 2 | 3 |

Low arsenic, insoluble

High arsenic, solubilized

Low Arsenic, solubilized

| Nc127p | Nc129p | Nc130p | Nc134p | Na24s | Na28s | Na29s | Na30s | Nc127s | Nc129s | Nc130s | Nc134s |
|--------|--------|--------|--------|-------|-------|-------|-------|--------|--------|--------|--------|
| 126    | 121    | 124    | 137    | 25    | 40    | 28    | 25    | 16     | 41     | 35     | 22     |
| 49     | 62     | 56     | 51     | 83    | 83    | 90    | 76    | 84     | 87     | 73     | 72     |
| 31     | 44     | 35     | 34     | 63    | 59    | 58    | 46    | 59     | 58     | 53     | 55     |
| 32     | 29     | 36     | 34     | 6     | 4     | 8     | 5     | 0      | 7      | 10     | 7      |
| 34     | 32     | 32     | 30     | 3     | 6     | 3     | 3     | 3      | 8      | 5      | 6      |
| 30     | 30     | 27     | 28     | 14    | 9     | 10    | 9     | 9      | 9      | 10     | 7      |
| 31     | 27     | 25     | 28     | 0     | 0     | 0     | 0     | 0      | 0      | 0      | 0      |
| 27     | 24     | 20     | 20     | 0     | 0     | 2     | 0     | 5      | 2      | 2      | 3      |
| 10     | 18     | 28     | 27     | 55    | 44    | 54    | 51    | 24     | 38     | 41     | 44     |
| 16     | 25     | 20     | 18     | 41    | 36    | 40    | 34    | 30     | 35     | 34     | 29     |
| 18     | 18     | 24     | 19     | 33    | 35    | 33    | 30    | 26     | 42     | 36     | 35     |
| 17     | 20     | 18     | 16     | 5     | 6     | 4     | 4     | 0      | 7      | 5      | 3      |
| 10     | 12     | 29     | 18     | 35    | 50    | 35    | 45    | 30     | 50     | 57     | 45     |
| 18     | 14     | 19     | 17     | 4     | 0     | 2     | 3     | 0      | 3      | 0      | 0      |
| 13     | 17     | 18     | 15     | 28    | 21    | 22    | 27    | 19     | 26     | 19     | 25     |
| 14     | 16     | 16     | 12     | 0     | 6     | 3     | 5     | 0      | 7      | 5      | 0      |
| 6      | 17     | 16     | 19     | 3     | 3     | 4     | 9     | 0      | 0      | 4      | 4      |
| 16     | 15     | 12     | 14     | 16    | 10    | 16    | 17    | 15     | 17     | 14     | 15     |
| 9      | 14     | 17     | 15     | 21    | 23    | 20    | 21    | 22     | 30     | 26     | 29     |
| 11     | 13     | 17     | 13     | 3     | 11    | 5     | 6     | 0      | 9      | 9      | 5      |
| 13     | 11     | 14     | 15     | 10    | 5     | 12    | 12    | 8      | 15     | 12     | 13     |
| 13     | 13     | 13     | 14     | 0     | 0     | 0     | 0     | 0      | 0      | 3      | 0      |
| 13     | 13     | 13     | 13     | 21    | 20    | 21    | 19    | 22     | 25     | 19     | 22     |
| 13     | 14     | 11     | 14     | 0     | 0     | 0     | 0     | 0      | 0      | 0      | 0      |
| 20     | 9      | 10     | 11     | 0     | 0     | 0     | 0     | 0      | 0      | 0      | 0      |
| 13     | 14     | 11     | 10     | 3     | 0     | 0     | 5     | 7      | 5      | 4      | 5      |
| 11     | 11     | 13     | 12     | 4     | 5     | 6     | 8     | 6      | 6      | 8      | 5      |
| 13     | 11     | 14     | 9      | 0     | 0     | 0     | 0     | 0      | 0      | 0      | 0      |
| 10     | 11     | 13     | 13     | 0     | 0     | 0     | 0     | 0      | 0      | 0      | 0      |
| 12     | 11     | 13     | 10     | 0     | 0     | 0     | 0     | 0      | 0      | 0      | 0      |
| 10     | 12     | 12     | 12     | 0     | 0     | 0     | 0     | 0      | 0      | 0      | 0      |
| 13     | 12     | 9      | 12     | 0     | 0     | 0     | 0     | 0      | 0      | 0      | 0      |
| 10     | 11     | 11     | 12     | 0     | 0     | 0     | 0     | 0      | 0      | 0      | 0      |
| 11     | 11     | 9      | 12     | 4     | 4     | 4     | 6     | 4      | 6      | 4      | 4      |
| 12     | 9      | 9      | 11     | 6     | 5     | 6     | 3     | 4      | 6      | 5      | 4      |
| 9      | 10     | 11     | 9      | 0     | 0     | 0     | 0     | 0      | 3      | 3      | 0      |
| 4      | 14     | 9      | 12     | 0     | 0     | 0     | 0     | 0      | 0      | 0      | 0      |
| 0      | 9      | 17     | 12     | 18    | 29    | 19    | 26    | 9      | 26     | 29     | 22     |
| 13     | 10     | 5      | 10     | 5     | 5     | 5     | 5     | 7      | 5      | 5      | 4      |
| 9      | 10     | 10     | 9      | 0     | 0     | 0     | 0     | 0      | 0      | 0      | 0      |
| 10     | 12     | 9      | 7      | 0     | 0     | 0     | 0     | 0      | 3      | 3      | 2      |
| 9      | 12     | 5      | 11     | 8     | 8     | 10    | 11    | 15     | 9      | 12     | 12     |

|    |    |    |    |    |    |    |    |    |    |    |    |
|----|----|----|----|----|----|----|----|----|----|----|----|
| 10 | 8  | 7  | 10 | 3  | 3  | 4  | 0  | 4  | 4  | 2  | 3  |
| 6  | 11 | 9  | 9  | 0  | 0  | 0  | 0  | 0  | 0  | 0  | 0  |
| 5  | 10 | 9  | 9  | 0  | 0  | 0  | 0  | 0  | 0  | 0  | 0  |
| 3  | 9  | 8  | 12 | 25 | 21 | 24 | 23 | 19 | 21 | 21 | 21 |
| 9  | 6  | 6  |    | 0  | 0  | 0  | 0  | 0  | 0  | 2  | 0  |
| 8  | 6  | 8  | 9  | 8  | 7  | 9  | 8  | 7  | 10 | 7  | 9  |
| 7  | 6  | 8  | 10 | 0  | 0  | 0  | 0  | 0  | 0  | 0  | 0  |
| 10 | 6  | 8  | 7  | 0  | 0  | 0  | 0  | 0  | 0  | 0  | 0  |
| 12 | 6  | 8  | 5  | 0  | 0  | 0  | 0  | 0  | 0  | 0  | 0  |
| 4  | 4  | 12 | 10 | 15 | 23 | 18 | 22 | 6  | 28 | 23 | 24 |
| 11 | 5  | 7  | 6  | 0  | 0  | 0  | 0  | 0  | 0  | 0  | 0  |
| 8  | 8  | 6  | 6  | 0  | 0  | 0  | 0  | 0  | 0  | 0  | 0  |
| 5  | 6  | 9  | 8  | 0  | 0  | 0  | 0  | 0  | 0  | 0  | 0  |
| 5  | 8  | 5  | 9  | 0  | 4  | 4  | 0  | 0  | 6  | 2  | 0  |
| 5  | 7  | 8  | 7  | 0  | 0  | 0  | 0  | 0  | 0  | 0  | 0  |
| 7  | 6  | 7  | 6  | 0  | 0  | 0  | 0  | 0  | 0  | 0  | 0  |
| 6  | 5  | 7  | 7  | 0  | 2  | 0  | 0  | 0  | 0  | 0  | 0  |
| 4  | 6  | 7  | 8  | 0  | 0  | 0  | 0  | 0  | 0  | 0  | 0  |
| 4  | 6  | 8  | 7  | 0  | 0  | 0  | 0  | 0  | 0  | 0  | 0  |
| 6  | 5  | 7  | 6  | 0  | 0  | 0  | 0  | 0  | 0  | 0  | 0  |
| 5  | 9  | 4  | 5  | 3  | 0  | 0  | 4  | 0  | 0  | 3  | 0  |
| 8  | 5  | 4  | 5  | 0  | 0  | 0  | 0  | 0  | 0  | 0  | 0  |
| 3  | 7  | 7  | 5  | 0  | 2  | 0  | 0  | 0  | 3  | 0  | 0  |
| 4  | 6  | 6  | 6  | 0  | 0  | 0  | 0  | 0  | 3  | 6  | 0  |
| 5  | 5  | 6  | 6  | 0  | 0  | 0  | 0  | 0  | 0  | 0  | 0  |
| 6  | 2  | 3  | 11 | 0  | 0  | 0  | 0  | 0  | 0  | 0  | 0  |
| 6  | 5  | 5  | 5  | 0  | 0  | 0  | 0  | 0  | 0  | 0  | 0  |
| 6  | 3  | 6  | 5  | 0  | 0  | 0  | 0  | 0  | 0  | 0  | 0  |
| 5  | 4  | 5  | 6  | 0  | 0  | 0  | 0  | 0  | 0  | 0  | 0  |
| 5  | 5  | 4  | 5  | 0  | 0  | 0  | 0  | 0  | 0  | 0  | 0  |
| 3  | 6  | 4  | 6  | 0  | 0  | 0  | 0  | 0  | 0  | 0  | 0  |
| 4  | 4  | 6  | 5  | 0  | 0  | 0  | 0  | 0  | 0  | 0  | 0  |
| 5  | 5  | 3  | 5  | 0  | 0  | 0  | 0  | 0  | 0  | 2  | 0  |
| 4  | 4  | 5  | 5  | 0  | 0  | 0  | 0  | 0  | 0  | 0  | 0  |
| 5  | 4  | 6  | 3  | 0  | 0  | 0  | 0  | 0  | 0  | 0  | 0  |
| 5  | 4  | 5  | 3  | 3  | 2  | 0  | 0  | 0  | 0  | 3  | 0  |
| 4  | 3  | 6  | 4  | 6  | 6  | 4  | 5  | 3  | 5  | 4  | 5  |
| 5  | 4  | 4  | 4  | 0  | 0  | 0  | 0  | 0  | 0  | 0  | 0  |
| 3  | 4  | 5  | 5  | 0  | 0  | 0  | 0  | 0  | 0  | 0  | 0  |
| 4  | 4  | 3  | 6  | 0  | 0  | 0  | 0  | 0  | 0  | 0  | 0  |
| 6  | 4  | 3  | 4  | 0  | 0  | 0  | 0  | 0  | 0  | 0  | 0  |
| 5  | 4  | 3  | 4  | 0  | 0  | 0  | 0  | 0  | 0  | 0  | 0  |
| 6  | 4  | 4  | 2  | 0  | 0  | 0  | 0  | 0  | 0  | 0  | 0  |
| 4  | 3  | 5  | 4  | 0  | 0  | 0  | 0  | 0  | 0  | 0  | 0  |

|   |   |   |   |   |   |   |   |   |   |   |   |
|---|---|---|---|---|---|---|---|---|---|---|---|
| 4 | 6 | 3 | 2 | 0 | 0 | 0 | 0 | 0 | 0 | 0 | 0 |
| 3 | 3 | 4 | 5 | 0 | 0 | 0 | 0 | 0 | 0 | 0 | 0 |
| 5 | 4 | 3 | 3 | 0 | 0 | 0 | 0 | 0 | 0 | 0 | 0 |
| 3 | 4 | 4 | 4 | 0 | 0 | 0 | 0 | 0 | 0 | 0 | 0 |
| 5 | 3 | 3 | 4 | 0 | 0 | 0 | 0 | 0 | 0 | 0 | 0 |
| 5 | 4 | 5 | 0 | 0 | 0 | 0 | 0 | 0 | 0 | 0 | 0 |
| 5 | 2 | 4 | 3 | 0 | 0 | 0 | 0 | 0 | 0 | 0 | 0 |
| 3 | 4 | 3 | 3 | 6 | 6 | 6 | 6 | 6 | 6 | 5 | 6 |
| 3 | 2 | 4 | 4 | 0 | 0 | 0 | 0 | 0 | 0 | 0 | 0 |
| 3 | 4 | 4 | 2 | 0 | 0 | 0 | 0 | 0 | 0 | 0 | 0 |
| 3 | 3 | 3 | 4 | 0 | 0 | 0 | 0 | 0 | 0 | 0 | 0 |
| 4 | 2 | 3 | 3 | 5 | 2 | 3 | 3 | 4 | 3 | 3 | 2 |
| 0 | 3 | 6 | 3 | 0 | 0 | 0 | 0 | 0 | 0 | 0 | 0 |
| 0 | 0 | 4 | 7 | 0 | 4 | 0 | 3 | 0 | 6 | 3 | 3 |
| 2 | 3 | 4 | 2 | 0 | 0 | 0 | 0 | 0 | 0 | 0 | 0 |
| 2 | 2 | 4 | 3 | 0 | 0 | 0 | 0 | 0 | 0 | 0 | 0 |
| 3 | 5 | 2 | 0 | 0 | 0 | 0 | 0 | 0 | 0 | 0 | 0 |
| 3 | 0 | 3 | 4 | 0 | 0 | 0 | 0 | 0 | 0 | 0 | 0 |
| 0 | 3 | 3 | 3 | 3 | 5 | 4 | 4 | 6 | 7 | 4 | 5 |
| 2 | 3 | 2 | 2 | 0 | 0 | 0 | 0 | 0 | 0 | 0 | 0 |
| 2 | 0 | 3 | 4 | 0 | 0 | 0 | 0 | 0 | 0 | 0 | 0 |
| 2 | 2 | 3 | 2 | 0 | 0 | 0 | 0 | 0 | 0 | 0 | 0 |
| 3 | 0 | 4 | 2 | 0 | 0 | 0 | 0 | 0 | 0 | 0 | 0 |
| 2 | 2 | 2 | 2 | 0 | 0 | 0 | 0 | 0 | 0 | 2 | 0 |
| 2 | 2 | 2 | 2 | 0 | 0 | 0 | 0 | 0 | 0 | 0 | 0 |
| 2 | 2 | 2 | 2 | 0 | 0 | 0 | 0 | 0 | 0 | 0 | 0 |
| 2 | 2 | 2 | 2 | 0 | 0 | 0 | 0 | 0 | 0 | 0 | 0 |
| 3 | 0 | 2 | 3 | 0 | 0 | 0 | 0 | 0 | 0 | 0 | 0 |
| 0 | 2 | 4 | 2 | 0 | 0 | 0 | 0 | 0 | 0 | 0 | 0 |
| 0 | 2 | 2 | 4 | 0 | 0 | 0 | 0 | 0 | 0 | 0 | 0 |
| 0 | 0 | 2 | 5 | 0 | 0 | 0 | 0 | 0 | 0 | 0 | 0 |
| 0 | 0 | 4 | 3 | 0 | 0 | 0 | 0 | 0 | 0 | 0 | 0 |
| 2 | 3 | 2 | 0 | 0 | 0 | 0 | 0 | 0 | 0 | 0 | 0 |
| 3 | 0 | 2 | 2 | 0 | 0 | 0 | 0 | 0 | 0 | 0 | 0 |
| 0 | 0 | 7 | 0 | 0 | 0 | 0 | 0 | 0 | 0 | 0 | 0 |
| 3 | 2 | 2 | 0 | 0 | 0 | 0 | 0 | 0 | 0 | 0 | 0 |
| 2 | 3 | 2 | 0 | 0 | 0 | 0 | 0 | 0 | 0 | 0 | 0 |
| 3 | 4 | 0 | 0 | 0 | 0 | 0 | 0 | 0 | 0 | 0 | 0 |
| 3 | 2 | 0 | 2 | 0 | 0 | 0 | 0 | 0 | 0 | 0 | 0 |
| 0 | 2 | 3 | 2 | 0 | 0 | 0 | 0 | 0 | 0 | 0 | 0 |
| 0 | 3 | 3 | 0 | 9 | 7 | 8 | 8 | 7 | 7 | 7 | 6 |
| 0 | 4 | 2 | 0 | 5 | 4 | 5 | 4 | 3 | 4 | 4 | 3 |
| 2 | 0 | 2 | 2 | 0 | 0 | 0 | 0 | 0 | 0 | 0 | 0 |
| 0 | 0 | 2 | 4 | 0 | 0 | 0 | 0 | 0 | 0 | 0 | 0 |
